1 **The meiotic LINC complex component KASH5 is an activating adaptor for cytoplasmic**  
2 **dynein**

3

4

5 Kirsten E. L. Garner<sup>1\*</sup>, Anna Salter<sup>1,2\*</sup>, Clinton K. Lau<sup>3</sup>, Manickam Gurusaran<sup>4</sup>, Cécile  
6 Villemant<sup>1</sup>, Elizabeth P. Granger<sup>1</sup>, Gavin McNee<sup>1</sup>, Philip G. Woodman<sup>1</sup>, Owen R. Davies<sup>4</sup>,  
7 Brian E. Burke<sup>2\*</sup>, and Victoria J. Allan<sup>1,2\*</sup>

8

9 \*: equal contributions

10

11 1: School of Biological Sciences, Faculty of Biology, Medicine and Health, University of  
12 Manchester, The Michael Smith Building, Rumford St, Manchester M13 9PT.

13 2: A\*STAR Institute of Medical Biology, 8A Biomedical Grove, #06-06 Immunos, Singapore  
14 138648.

15 3: MRC Laboratory of Molecular Biology, Francis Crick Avenue, Cambridge Biomedical  
16 Campus, Cambridge CB2 0QH, UK

17 4: Wellcome Centre for Cell Biology, Institute of Cell Biology, University of Edinburgh,  
18 Michael Swann Building, Max Born Crescent, Edinburgh EH9 3BF, UK

19

20

21 Present addresses: Brian Burke, A\*STAR Skin Research Labs (A\*SRL), Biopolis, 8A Biomedical  
22 Grove, #06-06 Immunos, Singapore; Elizabeth Granger, University of Central Lancashire,  
23 Preston, PR1 2HE, UK; Gavin McNee, University of Birmingham, Edgbaston, Birmingham B15  
24 2TT; Anna Salter, Immunocore Ltd, 92 Park Drive, Milton Park, OX14 4RY, UK; Cécile  
25 Villemant, The Automation Partnership, (Cambridge) Limited, York Way, Royston,  
26 Hertfordshire, SG8 5WY, UK

27

28

29 Corresponding author: Viki Allan ([wiki.allan@manchester.ac.uk](mailto:wiki.allan@manchester.ac.uk)), ORCID 0000-0003-4583-  
30 0836

31 **Abstract**

32

33 Cytoplasmic dynein-driven movement of chromosomes during prophase I of meiosis is  
34 essential for synapsis and genetic exchange. Dynein connects to chromosome telomeres via  
35 KASH5 and SUN1/2, which span the outer and inner nuclear envelopes, respectively. Here,  
36 we show that KASH5 promotes dynein motility in vitro, and cytosolic KASH5 inhibits dynein's  
37 interphase functions. KASH5 interacts with either dynein light intermediate chain (DYNC1LI1  
38 or DYNC1LI2) via a conserved linker-helix in the LIC C-terminal, and this region is also  
39 needed for dynein's recruitment to other cellular membranes. KASH5's N-terminal EF-hands  
40 are essential, as the interaction with dynein is disrupted by mutation of key calcium-binding  
41 residues, although it is not regulated by cellular calcium levels. Dynein can be recruited to  
42 KASH5 at the nuclear envelope independently of dynactin, while LIS1 is essential for  
43 dynactin incorporation into the KASH5-dynein complex. Altogether, we show that the trans-  
44 membrane protein KASH5 is an activating adaptor for dynein, and shed light on the  
45 hierarchy of assembly of KASH5-dynein-dynactin complexes.

## 46 Introduction

47 To conceive healthy offspring, a paternal sperm and maternal egg must be created, which  
48 requires the specialised form of cell division, meiosis. During the long meiotic prophase I,  
49 sister chromatids attach to the nuclear envelope via their telomeres, and move along the  
50 inner nuclear membrane (INM) to transiently cluster in a 'meiotic bouquet' (Fig. S1 A) which  
51 enables the formation of the synaptonemal complex in zygotene (Chikashige et al., 2006;  
52 Koszul et al., 2008; Trelles-Sticken et al., 2005). This facilitates synapsis and recombination  
53 between homologous chromosomes, which is essential for meiotic progression and the  
54 generation of two genetically distinct haploid daughter cells (Hamer et al., 2008; Liu et al.,  
55 2019; Zhang et al., 2019). These dynamic chromosome movements require force generated  
56 by the microtubule motor cytoplasmic dynein-1 (Burke, 2018; Horn et al., 2013; Lee et al.,  
57 2015; Lee and Burke, 2018; Morimoto et al., 2012; Rog and Dernburg, 2015; Sato et al.,  
58 2009; Wynne et al., 2012). Crucially, the force must be transmitted from the cytoplasm to  
59 the chromosomes on the other side of the nuclear envelope. This is achieved by Linkers of  
60 Nucleoplasm and Cytoplasm (LINC complexes) which span the nuclear envelope to  
61 physically connect the cytoskeleton and nucleus (Burke, 2018; Lee and Burke, 2018; Sato et  
62 al., 2009; Spindler et al., 2019) (Fig. S1 A).

63  
64 LINC complexes consist of SUN (Sad1, Unc-84) domain proteins that span the INM, binding  
65 nuclear lamins and chromatin associated proteins in the nucleoplasm, and interacting with  
66 KASH (Klarsicht, ANC-1, Syne Homology) domain proteins. KASH proteins have large  
67 cytosolic domains that bind cytoskeleton-associated proteins and are anchored in the ONM  
68 by a C-terminal transmembrane domain (Bone and Starr, 2016; Burke, 2018). Inside the  
69 nuclear envelope lumen, the 50-60 amino acid C terminal KASH-domain sequence associates  
70 with SUN proteins, restricting the KASH protein localisation to the nuclear membrane  
71 (Morimoto et al., 2012; Starr, 2011; Starr and Han, 2002). The meiotic LINC complex  
72 contains SUN1 and SUN2, which have largely redundant roles (Ding et al., 2007; Link et al.,  
73 2014; Schmitt et al., 2007). They bind to a meiotic telomere complex (Dunce et al., 2018;  
74 Shibuya et al., 2014), and to KASH5 in vertebrates, which recruits dynein in the cytoplasm to  
75 transmit the mechanical force required for synapsis to telomeres (Horn et al., 2013;  
76 Morimoto et al., 2012) (Fig. S1 A). The critical importance of KASH5 during meiosis is  
77 exemplified by the *KASH5*<sup>-/-</sup> null mouse, which is completely sterile due to impaired synapsis

78 and resulting meiotic arrest (Horn et al., 2013). Human mutations in the transmembrane  
79 domain that cause mistargeting of KASH5 to mitochondria lead to male sterility (Bentebbal  
80 et al., 2021). KASH5 shares sequence homology with the N-terminal region of the protein  
81 encoded by the zebrafish gene *futile cycle* which is required for pronuclear migration  
82 (Dekens et al., 2003; Lindeman and Pelegri, 2012), another dynein-dependent function in  
83 which the female pronucleus uses dynein to migrate towards the male pronucleus along  
84 microtubules nucleated from the male centrosome (Gönczy et al., 1999; Payne et al., 2003;  
85 Reinsch and Karsenti, 1997; Robinson et al., 1999). The KASH protein responsible for  
86 pronuclear migration in mammals is not yet known.

87

88 Cytoplasmic dynein-1 (dynein, hereafter) transports a diverse range of cargo to the minus  
89 end of microtubules (Reck-Peterson et al., 2018). It is a large 1.6 MDa holoenzyme  
90 comprised of two heavy chains (DHC: DYNC1H1) containing the globular motor domains,  
91 which are the site of ATP hydrolysis. Its cargo binding tail domain contains the intermediate  
92 chains (ICs: DYNC1I1 and 2) which bind directly to the DHCs; three light chains (LCs), which  
93 bind to the ICs; and two light intermediate chains (LICs: DYNC1LI1 and 2) (Pfister et al.,  
94 2005; Reck-Peterson et al., 2018). The LICs bind to DHC via their N terminal GTPase-like  
95 domain, although they are not thought to exhibit GTPase activity (Schroeder et al., 2014).  
96 The LICs have an unstructured carboxy terminus which protrudes from the motor complex  
97 (Celestino et al., 2019; Lee et al., 2018; Schroeder et al., 2014). While the GTPase-like  
98 domain sequence is highly conserved between LIC1 and 2, there is less homology in the C  
99 terminus apart from two regions of predicted alpha-helix (Celestino et al., 2019; Kumari et  
100 al., 2021b; Lee et al., 2020; Lee et al., 2018). As described below, this C-terminal domain  
101 mediates the interaction between dynein and the recently identified activating cargo  
102 adaptors.

103

104 Dynein requires the multi-component dynactin complex for function (Feng et al., 2020; Gill  
105 et al., 1991; King et al., 2003; McKenney et al., 2014; Schlager et al., 2014a; Schroer and  
106 Sheetz, 1991), although dynein and dynactin alone interact weakly (Baumbach et al., 2017;  
107 Chowdhury et al., 2015; Jha et al., 2017; Splinter et al., 2012; Urnavicius et al., 2015). A third  
108 component is needed for optimum motility and force generation *in vitro*, the 'activating  
109 adaptors' (Belyy et al., 2016; McKenney et al., 2014; Schlager et al., 2014a), and many have

110 been identified (for reviews see (Canty and Yildiz, 2020; Olenick and Holzbaur, 2019; Reck-  
111 Peterson et al., 2018)), which promote dynein function in several ways. Firstly, they  
112 strengthen the interaction between dynein and dynactin (Schroeder and Vale, 2016; Splinter  
113 et al., 2012) by forming extensive interactions with both components to generate a  
114 tripartite dynein-dynactin-adaptor (DDA) complex, or complexes with two dyneins per  
115 dynactin and adaptor (D<sub>2</sub>DA) (Chowdhury et al., 2015; Grotjahn et al., 2018; Lau et al., 2021;  
116 Lee et al., 2020; Urnavicius et al., 2018; Urnavicius et al., 2015). Secondly, they release the  
117 dynein motor domains from the autoinhibited Phi conformation (Torisawa et al., 2014;  
118 Zhang et al., 2017), helping to align them for microtubule interaction (Chowdhury et al.,  
119 2015; Zhang et al., 2017). Finally, they recruit dynein and dynactin to cargo (for example  
120 (Horgan et al., 2010b; Schroeder and Vale, 2016; Splinter et al., 2012; Wang et al., 2019)).

121

122 The assembly and function of dynein adaptor complexes is promoted by the dynein  
123 regulator Lissencephaly-1 (LIS1). LIS1 is needed for many dynein functions (reviewed in  
124 (Markus et al., 2020) and is mutated in the neurodevelopmental disorder, Type-1  
125 lissencephaly (Reiner et al., 1993), which results from defective neural migration and  
126 progenitor proliferation (Hirotsune et al., 1998; Markus et al., 2020). LIS1 enhances the  
127 formation of DDA complexes (Baumbach et al., 2017; Dix et al., 2013) and increases the  
128 frequency, velocity and duration of dynein complex movement (Baumbach et al., 2017; Dix  
129 et al., 2013; Fenton et al., 2021; Gutierrez et al., 2017). Recent mechanistic studies have  
130 shown that LIS1 binding to the dynein motor domain promotes the opening of the Phi  
131 complex ((Elshenawy et al., 2020; Gillies et al., 2022; Htet et al., 2020; Marzo et al., 2020;  
132 Qiu et al., 2019) reviewed in (Canty and Yildiz, 2020; Markus et al., 2020; Olenick and  
133 Holzbaur, 2019)), a conformation that may assemble more readily with adaptors as well as  
134 being more active. This may be how LIS1 increases the proportion of D<sub>2</sub>DA complexes  
135 containing two dyneins (Elshenawy et al., 2020; Htet et al., 2020) which generate more  
136 force, move faster and are more processive than single dynein DDA complexes (Elshenawy  
137 et al., 2019; Sladewski et al., 2018; Urnavicius et al., 2018). Furthermore, LIS1 also  
138 contributes to the recruitment of dynein, dynactin and/or adaptors to cellular cargoes  
139 ranging from ribonucleoprotein particles (RNPs) (Dix et al., 2013), to membranes (Lam et al.,  
140 2010), Rab6-positive vesicles (Splinter et al., 2012), the nuclear envelope (Cockell et al.,

141 2004; Sitaram et al., 2012; Splinter et al., 2012), spindle poles (Sitaram et al., 2012; Wang et  
142 al., 2013) and kinetochores (Dzhindzhev et al., 2005; Siller et al., 2005).

143

144 Activating adaptor proteins share little sequence homology, but generally contain a long  
145 coiled coil domain, and a site for cargo binding (Lee et al., 2020; McKenney et al., 2014;  
146 Redwine et al., 2017; Schlager et al., 2014a; Schlager et al., 2014b; Urnavicius et al., 2015).  
147 They all interact with the C-terminal domain of LICs via at least three distinct types of  
148 sequence motif: the CC1 box; the Hook domain; or EF hands (Celestino et al., 2019; Gama et  
149 al., 2017; Lee et al., 2020; Lee et al., 2018; Schroeder and Vale, 2016), and the motility of all  
150 three types of DDA complex is promoted by LIS1 (Htet et al., 2020). Other adaptors may not  
151 activate dynein, but still serve to link the motor to cargoes (Olenick and Holzbaaur, 2019;  
152 Reck-Peterson et al., 2018). An example is Rab7-interacting lysosomal protein (RILP), which  
153 recruits dynein and dynactin to Rab7 positive late endosomes/lysosomes (Johansson et al.,  
154 2007; Jordens et al., 2001; Scherer et al., 2014; Tan et al., 2011) via its RILP homology  
155 domains, but lacks a long coiled coil. KASH5 is a good candidate to be an activating adaptor,  
156 because it contains an N-terminal EF-hand domain that binds dynein, followed by a long  
157 coiled coil (Horn et al., 2013; Morimoto et al., 2012). However, unlike other activating  
158 adaptors characterised so far, it is a trans-membrane protein.

159

160 Mammalian dynein contains either two LIC1 subunits, or two LIC2 subunits (Tynan et al.,  
161 2000a), thus providing the potential for differential interactions with adaptors. However,  
162 both LICs bind to the adaptors Rab11-FIP3 (Celestino et al., 2019; Horgan et al., 2010a;  
163 Horgan et al., 2010b), RILP (Celestino et al., 2019; Scherer et al., 2014), BICD2, spindly,  
164 Hook3, ninein and TRAK1 (Celestino et al., 2019), via the highly conserved helix 1 in the LIC  
165 C-terminus. This shared binding ability suggests that LICs may act redundantly, as has been  
166 reported in the endocytic pathway (Horgan et al., 2010a; Horgan et al., 2010b; Tan et al.,  
167 2011). However, other endocytic functions may be isoform-specific (Bielli et al., 2001; Hunt  
168 et al., 2013; Palmer et al., 2009). Likewise, although LIC1 and 2 act redundantly for some  
169 mitotic functions (Jones et al., 2014; Raaijmakers et al., 2013), isoform-specific functions  
170 and localisations have been reported during mitosis (Horgan et al., 2011; Mahale et al.,  
171 2016a; Mahale et al., 2016b; Palmer et al., 2009; Raaijmakers et al., 2013; Sharma et al.,  
172 2020; Sivaram et al., 2009), at the centrosome (Tynan et al., 2000b), during neuronal

173 nuclear migration (Goncalves et al., 2019) and cell migration (Even et al., 2019; Schmoranzer  
174 et al., 2009). In addition, mitotic phosphorylation of the LIC1 C-terminal domain may  
175 provide temporal control of adaptor selection (Kumari et al., 2021a). The degree of specific  
176 and shared functions for LICs is an important issue that is not fully resolved.

177

178 How the dynein motor interacts with KASH5 to drive the dynamic chromosome movements  
179 essential for meiosis has remained unknown. Here, we reveal the transmembrane protein  
180 KASH5 to be a novel member of the dynein activating adaptor class that interacts with the  
181 LIC helix 1 region. We demonstrate that this region in the LIC is also key for dynein's  
182 function at the Golgi apparatus and throughout the endocytic pathway, with LICs 1 and 2  
183 acting redundantly in these locations. Analysis of the hierarchy of adaptor complex  
184 assembly reveals that dynein can be recruited to KASH5 independently of dynactin, and that  
185 LIS1 is essential for full complex assembly. The interaction between KASH5 and dynein is  
186 disrupted by mutation of the KASH5 EF hand domain, although dynein recruitment to KASH5  
187 in cells is calcium independent. Since defective synapsis can lead to genetic abnormalities  
188 and infertility, the characterisation of the KASH5-dynein interaction is an important step  
189 forward in understanding the complex mechanism of chromosome movement during  
190 meiotic prophase I.

191

## 192 **Results**

### 193 **KASH5 forms a complex with dynein, dynactin and LIS1**

194 To investigate the interaction between dynein and KASH5 (Horn et al., 2013; Morimoto et  
195 al., 2012), we generated a stable HeLa cell line in which expression of GFP-KASH5 was  
196 induced by addition of doxycycline. This was used to examine the recruitment of  
197 endogenous dynein to the nuclei of KASH5-expressing cells by immunofluorescence. Since  
198 dynein requires the multi-subunit dynactin complex for function, we also probed for  
199 dynactin components. LIC1 and dynactin p50 were both recruited to KASH5-expressing  
200 nuclei (Fig. 1 A), in addition to dynactin p150 and IC (Horn et al., 2013). In contrast, neither  
201 dynein nor dynactin (Fig. 1 A) were recruited to the nuclei of cells transiently expressing a  
202 different KASH containing protein, nesprin-2 $\alpha$ 2 (GFP-N2 $\alpha$ 2).

203

204 We confirmed the recruitment of dynein and dynactin to KASH5 biochemically. HeLaM cells  
205 were transiently transfected with GFP-KASH5ΔK (Fig. 1 B) or GFP-N2α2ΔK, which lack their  
206 KASH and transmembrane domains, and so are cytosolic. LIC1, LIC2, IC and p150 all  
207 associated with GFP-KASH5ΔK and not with GFP-N2α2ΔK (Fig. 1 C). The KASH5 N-terminal  
208 166 amino acids (GFP-KASH5ND), containing the EF-hands, were sufficient to pull down  
209 dynein IC and dynactin from cell lysates as efficiently as GFP-KASH5ΔK (Horn et al., 2013),  
210 and the same is true for LIC1 (Fig. 1 D).

211

212 LIS1 plays a key role in the assembly of DDA and D<sub>2</sub>DA complexes (reviewed in (Canty and  
213 Yildiz, 2020; Markus et al., 2020; Olenick and Holzbaur, 2019), and co-precipitates with  
214 BICD2N along with dynein and dynactin (Splinter et al., 2012). In accordance with previous  
215 biochemical analysis (Horn et al., 2013), GFP-KASH5ΔK pulled down LIS1 as well as dynein  
216 and dynactin, but this complex excluded the dynein adaptor BICD2 (Fig. 1 C).

217 Immunofluorescence analysis revealed that endogenous LIS1 was detected at the nuclear  
218 envelope in 99.8% of KASH5-expressing cells (Fig. S1 A), whereas the LIS1 and dynein  
219 interactor Nde1 was not, even though it could be detected at the nuclear envelope in late  
220 G2 cells (Fig. 1 A).

221

### 222 **Hierarchy of dynein, dynactin and LIS1 recruitment to KASH5**

223 We next sought to identify which dynein subunits mediate the KASH5 interaction, and the  
224 roles played by dynactin and LIS1. We used RNA interference to deplete individual dynein  
225 subunits in the GFP-KASH5 cell line (Fig. S2 A) and assessed the effect on recruitment to  
226 KASH5. Depletion of dynein IC2 (the only form expressed in HeLa cells: (Palmer et al., 2009))  
227 did not prevent dynein recruitment (Fig. 2 A), with 100% of KASH5-positive nuclei being  
228 labelled with anti-LIC1 (Fig. S1 A). Cytosolic levels of LIC1 were reduced following IC2  
229 depletion, making the nuclear envelope pool particularly distinct. This is likely due to a  
230 modest reduction in total dynein levels when IC2 is depleted, as seen by immunoblotting  
231 with anti-LIC1 and 2 (Fig. S2 A). LIS1 recruitment to KASH5 at the nuclear envelope was also  
232 unaffected by depletion of IC2 (Fig. 2 A and S1 B). Strikingly, dynactin was only rarely  
233 detected at the nuclear envelope in IC2-depleted cells using antibodies to p150 or p50 (Fig.  
234 2 A and S2 A), even though p150 was still readily observed at microtubule plus ends. These  
235 data suggest that while the interaction between IC and p150 (Karki and Holzbaur, 1995; King



236 et al., 2003; Vaughan and Vallee, 1995) is not needed for dynein and LIS1 recruitment to  
237 KASH5, it is essential for the association of dynactin with KASH5.

238

239 Since IC2 depletion reduced total cellular dynactin p150 levels by ~25% (Fig. S1 A), we used  
240 a dominant negative approach as another way of testing the effect of disrupting IC2-p150  
241 interactions on recruitment to KASH5, using over-expression of the coiled coil 1 region of  
242 p150 (CC1) (King et al., 2003; Quinyne et al., 1999). Because the stable GFP-KASH5 cell line  
243 was resistant to transient transfection, we co-transfected HeLa cells with GFP-KASH5 and  
244 myc-SUN2 (to ensure efficient localisation of KASH5 to the nuclear envelope) along with  
245 RFP-tagged CC1. Strikingly, while CC1 expression had no effect on dynein or LIS1  
246 recruitment to KASH5, it prevented dynactin accumulation at the nuclear envelope (Fig. 2  
247 B). These data confirm that dynein and LIS1 can associate with KASH5 independently of  
248 dynactin.

249

250 As the LICs have recently been recognised as having important interactions with cargo  
251 adaptors, we used RNAi to investigate their involvement in the dynein-KASH5 interaction.  
252 There was no reduction in the proportion of cells with detectable dynein, dynactin or LIS1  
253 recruited to KASH5 after depleting LIC2 alone (Fig. 3 B, D). LIC1 depletion also had very little  
254 effect on dynactin or LIS1 recruitment in a binary scoring assay, but had a variable effect on  
255 dynein intermediate chain, with  $80.8 \pm 24.3\%$  of cells ( $n=3$  experiments,  $\pm$ SD) showing IC  
256 signal at the nuclear envelope (Fig. 3 A, D). However, when both LIC1 and LIC2 were  
257 depleted simultaneously, the proportion of cells with detectable dynein and dynactin at the  
258 nuclear envelope was reduced by nearly 75% (Fig. 3 C, D). LIS1 recruitment was also  
259 reduced, but to a lesser extent than dynein or dynactin, with ~60% of KASH5 expressing cells  
260 showing LIS1 signal at the nuclear envelope. We were not able to deplete endogenous LIC1  
261 completely using RNAi (Fig. S2 B) which may explain why in some cells a residual level of  
262 dynein, dynactin and LIS1 remained with KASH5 at the nuclear envelope. In addition, GFP-  
263 KASH5 $\Delta$ K pull-downs from LIC1 and 2 depleted HeLa cells contained very little dynein and  
264 dynactin (Fig. 3 E). Thus, LIC1 and 2 act redundantly to recruit dynein and LIS1 to KASH5 at  
265 the nuclear envelope, with dynactin being recruited downstream, by a mechanism requiring  
266 the interaction between IC and p150.

267

268 We next used RNAi depletion of LIS1 in the GFP-KASH5 cell line to test if it is required for  
269 KASH5 to associate with dynein and dynactin. Interestingly, the proportion of cells with LIC1  
270 detectable at the nuclear envelope was virtually unaffected by LIS1 knock-down (Fig. S1 C,  
271 D) whereas p150 recruitment was seen in only 20% of cells (Fig. S1 C, F). Dynein IC detection  
272 at KASH5-positive nuclei was highly variable between experiments (Fig. S1 C, E), with a  
273 mean of 57.1% of cells scoring positive for IC74 antibody labelling. The discrepancy between  
274 the anti-LIC1 and IC scoring most likely reflects the generally weaker nuclear envelope  
275 labelling seen with the IC74 antibody compared to anti-LIC1 antibodies in control cells. We  
276 interpret these data to mean that LIS1 depletion reduces dynein levels at the nuclear  
277 envelope somewhat, to levels that are still detectable by anti-LIC1 but sometimes not by  
278 IC74. Altogether, these data reveal that LIS1 is vital for the dynactin complex to be recruited  
279 to KASH5 downstream of dynein and suggest that LIS1 may also promote the formation of,  
280 or stabilise, the KASH5-dynein complex.

281

### 282 **Dynein LIC1 residues 388-458 are essential for KASH5 binding and for dynein's function on** 283 **multiple membrane cargoes**

284 We next wanted to ascertain the LIC1 region responsible for the dynein-KASH5 interaction,  
285 focussing on the C-terminal domain that contains the cargo-binding helix 1 (residues 440-  
286 456) and helix 2 (residues 493-502) (Celestino et al., 2019; Lee et al., 2020; Lee et al., 2018).  
287 While helix 1 and some preceding amino acids (433-458) forms the minimal region needed  
288 for interaction with Hooks, BICD2 and Spindly (Lee et al., 2018), additional interactions  
289 between LIC1 and Spindly, BICD2 and Hook3 have been seen in helix 2 and the linker region  
290 upstream of helix 1 (Celestino et al., 2019). In contrast, RILP only requires helix 1 (LIC1 440-  
291 455) (Celestino et al., 2019). We generated a series of GFP-tagged human LIC1 constructs  
292 (Fig. 4 A): full length LIC1 (GFP-LIC1-FL: amino acids 1-523); a truncation which contains helix  
293 1 but not helix 2 (GFP-LIC1-CT2: amino acids 1-456); and a construct which terminates  
294 shortly after the Ras-like domain and lacks both helix 1 and 2, as well as the linker  
295 sequences (GFP-LIC1-CT3: amino acids 1-388). We first examined the recruitment of the  
296 different LIC1 truncations to full length KASH5 at the nuclear envelope by  
297 immunofluorescence in HeLaM cells co-expressing HA-KASH5, myc-SUN2 and GFP-LIC1  
298 constructs. Full-length GFP-LIC1 was efficiently recruited to KASH5, as expected (Fig. 4 B).  
299 The mid-length LIC1 CT2 construct was also strongly recruited to the nuclear envelope in

300 KASH5-SUN2 expressing cells. However, LIC1 1-388 (GFP-LIC1-CT3) was not recruited to  
301 KASH5 at all (Fig. 4 B). To verify these findings biochemically, cells depleted of LIC1 and 2 by  
302 RNAi were co-transfected with myc-tagged LIC1 truncations and the soluble GFP-KASHND  
303 construct. GFP trap immunoprecipitation revealed that while dynein containing FL-LIC1 and  
304 LIC1-CT2 was recruited to the KASH5 N-terminal domain, dynein with LIC1-CT3 was not (Fig.  
305 4 C). These results indicate the LIC1 residues 388-456, containing helix 1 and its upstream  
306 linker sequence, are essential for the interaction with KASH5.

307

308 The importance of the LIC helix 1 in cargo binding prompted us to use these tools to assess  
309 the role of the LICs on a variety of endogenous membrane cargoes, for which the adaptors  
310 have not been fully defined (see discussion). First, we tested if LIC1 and 2 functioned  
311 redundantly in Golgi apparatus positioning, as there is conflicting evidence for the effects of  
312 depleting LICs on Golgi apparatus morphology and position (Kumari et al., 2021a; Palmer et  
313 al., 2009; Tan et al., 2011). RNAi depletion of LIC1 or 2 individually led to break-up of the  
314 Golgi ribbon in ~60% of HeLaM cells, with the Golgi fragments remaining centrally located  
315 (Fig. 5 A-C; Fig. S3 A). In contrast, depletion of both LICs simultaneously led to complete  
316 fragmentation and scattering of the Golgi apparatus (Fig. 5 B, C), suggesting that the LICs  
317 indeed act redundantly in Golgi positioning. This was confirmed by expressing RNAi-  
318 resistant LIC1-mKate or LIC2-mKate in cells depleted of both LICs (Fig. 5 D), as either LIC was  
319 able to fully restore Golgi apparatus clustering.

320

321 The endocytic pathway also relies heavily on dynein activity, which drives the movement of  
322 endocytic organelles towards the centrosome (Flores-Rodriguez et al., 2011; Granger et al.,  
323 2014; Reck-Peterson et al., 2018; Wang et al., 2019). This motility contributes to the sorting  
324 of endocytic cargo in the early endosome (Driskell et al., 2007). Depletion of both LICs  
325 profoundly altered the distribution of early endosomes, recycling endosomes and lysosomes  
326 (Fig. 6 A) while only minimal effects were seen with single depletions (not shown).

327 Moreover, expression of either LIC1-mKate or LIC2-GFP restored the position of early  
328 endosomes, recycling endosomes and lysosomes (Fig. 6 B), confirming that LICs act  
329 redundantly in the general context of endocytic organelle motility, even though there are  
330 isoform-specific roles in SNX tubule dynamics (Hunt et al., 2013). We investigated if the  
331 same effects were observed with dynein recruitment to RILP. The presence of either LIC1 or

332 LIC2 was sufficient to recruit dynein and dynactin to HA-RILP-positive late endosomes,  
333 whereas recruitment of both complexes was significantly reduced when both LICs were  
334 depleted (Fig. S4 A-D).

335

336 To examine if the LIC1 region 388-456 that contains helix 1 is needed for Golgi apparatus  
337 positioning and in dynein's endocytic functions, we used the same knock-down and rescue  
338 approach (Figs. 5 E; 6 C, D; S4 E). Both the full length GFP-LIC1 and GFP-LIC1-CT2 rescued  
339 Golgi apparatus, early endosome, and lysosome clustering. In contrast, GFP-LIC1-CT3 did not  
340 restore retrograde transport, with EEA1-positive early endosomes (Fig. 6 C) and LAMP1-  
341 positive late endosomes/lysosomes (Fig. 6 D) remaining localised in the cell periphery, and  
342 the Golgi apparatus being fragmented and scattered (Fig. 5 E). Moreover, GFP-LIC1-CT3 did  
343 not interact with RILP, whereas GFP-LIC1-CT2 or full-length GFP-LIC1 were robustly recruited  
344 to RILP positive organelles (Fig. S4 E).

345

346 Altogether, these data provide clear *in cellulo* evidence that the LIC adaptor binding helix 1  
347 is needed for dynein's interaction with KASH5 and RILP, and is also crucial for dynein's  
348 function on the Golgi apparatus, early endosomes and lysosomes. Furthermore, we  
349 demonstrate that LIC1 and LIC2 act redundantly in these situations.

350

### 351 **KASH5 is a novel activating dynein adaptor**

352 KASH5 shares key characteristics with other activating dynein adaptors: interaction with LIC  
353 helix 1; ability to recruit dynactin; and presence of an N-terminal dynein binding domain  
354 (containing EF-hands) followed by an extended coiled coil (Horn et al., 2013). In addition,  
355 KASH5's biological function in telomere clustering in prophase of meiosis I (Horn et al.,  
356 2013; Lee et al., 2015) strongly suggest that it recruits active dynein. When expressed out of  
357 its meiotic context, in HeLa cells, we quite often observed clusters of KASH5 and dynein  
358 around discrete points close to or on top of the nucleus (red arrowheads and arrows in Fig.  
359 1 A), suggestive of clustering around the centrosome via active dynein. In addition,  
360 asymmetric distribution of KASH5 in the NE with enrichment towards the MTOC has been  
361 noted (Horn et al., 2013).

362

363 Overexpression of activating dynein adaptor proteins lacking their cargo binding domain  
364 disrupts dynein functions by sequestering dynein and preventing its binding to endogenous  
365 adaptors (e.g. (Hoogenraad et al., 2001; Hoogenraad et al., 2003; Horgan et al., 2010a;  
366 Horgan et al., 2010b; Splinter et al., 2012)). As KASH5 demonstrates the characteristics of a  
367 cargo adaptor that interacts with LIC helix 1, we hypothesised that it would compete with  
368 other adaptors for binding to dynein. Indeed, overexpression of cytosolic GFP-KASH5ΔK in  
369 HeLaM cells resulted in complete fragmentation of the Golgi apparatus, and redistribution  
370 of lysosomes to the cell periphery; phenotypes indicative of a loss of dynein function (Fig. 7  
371 A). In contrast, expression of a cytoplasmic KASH5 construct lacking its N terminal dynein  
372 binding domain (Fig. 1 B, GFP-KASH5ΔNDΔK (Horn et al., 2013)) had no effect on Golgi  
373 apparatus or lysosome distribution and morphology (Fig. 7 A). The effects of GFP-KASH5ΔK  
374 are therefore due to KASH5 binding and sequestering dynein, preventing its recruitment to  
375 other membrane cargoes. We also tested whether GFP-KASH5ΔK expression had dominant  
376 negative effects on spindle integrity in mitosis, since this is compromised in cells depleted of  
377 both LICs (Jones et al., 2014). Interestingly, neither GFP-KASH5ΔK nor GFP-KASH5ΔNDΔK  
378 expression affected bipolar spindle assembly (Fig. S5 A, B) whereas expression of mCherry-  
379 p50 caused profound defects leading to almost complete loss of bipolar spindles (Fig. S5 C).  
380 Furthermore, although BICD2N expression is highly disruptive for dynein's interphase  
381 function (Hoogenraad et al., 2001; Hoogenraad et al., 2003; Splinter et al., 2012), it had only  
382 minor effects on spindle assembly (Fig. S5 B). These data suggest that there may be cell  
383 cycle regulation of dynein adaptor binding.

384

385 We next determined if KASH5 competes with established dynein adaptors for dynein  
386 binding. To test this possibility, we co-transfected HeLaM cells with HA-tagged full-length  
387 KASH5, myc-tagged SUN2 and dominant negative versions of the activating adaptors BICD2  
388 (GFP-BICD2N: (Hoogenraad et al., 2001; Splinter et al., 2012)) and Rab11-FIP3 (GFP-Rab11-  
389 FIP3 I737E, which retains its LIC binding domain but is unable to interact with Rab11 (Wilson  
390 et al., 2005)). Endogenous dynein was recruited to KASH5 at the nuclear envelope in control  
391 cells, but this was prevented when dominant negative dynein adaptors BICD2N and Rab11-  
392 FIP3 I737E were expressed (Fig. 7 B). We investigated if the same was true for dynein  
393 recruitment to RILP, even though RILP is not thought to be able to activate dynein/dynactin  
394 motility (Lee et al., 2020; Reck-Peterson et al., 2018). Dynein was recruited to RILP-positive

395 organelles following overexpression of HA-tagged RILP (Fig. 7 C). However, when GFP-  
396 BICD2N or GFP-Rab11-FIP3 I737E were co expressed, recruitment of dynein LIC1 to RILP was  
397 abrogated (Fig. 7 C). Taken together, these findings show that established dynein adaptor  
398 proteins compete with KASH5 and RILP for dynein binding.

399

400 To test directly if KASH5 could act as an activating adaptor and form motile complexes with  
401 dynein and dynactin, we used single molecule in vitro motility assays consisting of purified  
402 bacterially expressed KASH5 mixed with purified fluorescently-labelled dynein, dynactin and  
403 LIS1. We generated three KASH5 constructs encoding amino acids 1-407, 1-460, 1-507, all of  
404 which contain the N-terminal EF-hand dynein binding domain plus the predicted coiled coil  
405 region (amino acids 166-350), plus a variable amount of the C-terminal domain. SEC-MALS  
406 analysis showed that all three purified proteins formed dimers (shown for KASH5<sub>1-460</sub> in Fig.  
407 8 B). Of these, KASH5<sub>1-460</sub> was the most active in preliminary motility assays. Purified dynein,  
408 dynactin and LIS1 alone displayed very little motility (Fig. 8 C). The inclusion of KASH5<sub>1-460</sub>  
409 promoted processive dynein movements (Fig. 8 D), although a lesser number than seen with  
410 purified Hook3<sub>1-522</sub> (Sf9/baculovirus expressed (Urnavicius et al., 2018)). Importantly, the  
411 velocity of processive dynein movements was the same for KASH5<sub>1-460</sub> and Hook3<sub>1-522</sub> (Fig. 8  
412 E). KASH5, a transmembrane protein, is therefore a novel activating dynein adaptor.

413

#### 414 **KASH5's EF hand is critical for dynein and dynactin complex assembly**

415 A common feature of several dynein adaptor proteins is the presence of an N terminal pair  
416 of EF hands in the dynein-binding domain, as seen in Rab11-FIP3, CRACR2a, Rab45/RASEF  
417 and ninein (Celestino et al., 2019; Lee et al., 2020; Reck-Peterson et al., 2018; Wang et al.,  
418 2019). KASH5 contains two putative EF hands, extending from amino acids 36-103, which  
419 form the bulk of the dynein binding domain (Fig. 1 B, D; 4 C). Sequence alignment of the  
420 KASH5 EF hands with CRACR2a, Rab45, FIP3 and ninein revealed that KASH5, like FIP3 and  
421 ninein, lacks some of the key consensus calcium-binding amino acids (at positions named  
422 X,Y,Z,-X,-Y,-Z), and that these changes were consistent across species (Fig. 9 A). EF hand 1 is  
423 particularly divergent, with only the residue in position X (Grabarek, 2006) matching the  
424 consensus, and with the key position -Z being a glutamine or histidine instead of a  
425 glutamate residue. While EF hand 2 has consensus amino acids in position X, other residues  
426 either do not conform or vary between species. For example, in non-rodent KASH5 EF hand

427 2, there is aspartate in place of glutamate at -Z, which can result in magnesium binding  
428 (Grabarek, 2006), as suggested for FIP3 (Lee et al., 2020).

429

430 This analysis suggested that KASH5 might not be calcium regulated. To determine if the  
431 KASH5 and Rab11-FIP3 interaction with dynein in cells required calcium or not, we  
432 expressed GFP-tagged KASH5 with myc-SUN2 in HeLaM cells, or GFP-Rab11-FIP3 in Vero  
433 cells, and labelled for endogenous LIC1. In control DMSO-treated cells there was robust  
434 recruitment of dynein to KASH5 at the nuclear envelope, and to Rab11-FIP3-positive  
435 recycling endosomes (Fig. S6). This recruitment was not affected by treating cells with the  
436 cell permeable calcium chelator, BAPTA-AM, for 2 hours to deplete intracellular calcium  
437 (Fig. S6). This demonstrates that the KASH5-dynein interaction does not require calcium and  
438 confirms that the Rab11-FIP3-dynein interaction in cells is calcium-independent, as reported  
439 for in vitro assays (Lee et al., 2020).

440

441 We wanted to test the importance of KASH5's EF hands in the dynein interaction, even if  
442 calcium was not required. The *fue* mutation in the zebrafish KASH5 homologue, futile cycle  
443 (*fue*) (Lindeman and Pelegri, 2012), gives zygotes are defective in pronuclear migration and  
444 mitotic spindle assembly (Dekens et al., 2003; Lindeman and Pelegri, 2012). The  
445 corresponding mutation in human KASH5 changes a valine to glutamic acid in EF hand 1  
446 (V54E: Fig. 9 A). We generated KASH5-EF-*fue* constructs to establish how this mutation  
447 affected KASH5-dynein interactions. We also mutated the amino acids in positions X and Y  
448 of both EF hands to alanine (KASH5-EF-AA: D44A; Q46A; D81A; N83A: Fig. 9 A), based on  
449 similar mutations in CRACR2a which ablate its function (Srikanth et al., 2016; Wang et al.,  
450 2019). Lastly, we made two mutants where some KASH5 residues were replaced by those  
451 found in CRACR2a (Fig. 9 A). In KASH5-EF-mod1, four CRACR2a amino acid substitutions  
452 were made: Q46E; Q55D; P87Y and K88L. In KASH5-EF-mod2, nine amino acids in EF hands 1  
453 and 2 and part of the exiting helix were changed to the CRACR2a sequences.

454

455 To test the effects of these mutations on KASH5 function, we harnessed the dominant  
456 negative effect of expressing cytosolic KASH5, which causes Golgi fragmentation and  
457 peripheral lysosome distribution (Fig. 5 and 6). In this assay, any mutant that prevents  
458 KASH5 from interacting with dynein would have no effect on organelle morphology when

459 expressed, as seen with GFP alone (Fig. 9 B). Overexpression of GFP-KASH5ΔK or GFP-  
460 KASH5ΔK-mod1 in HeLaM cells resulted in complete fragmentation of the Golgi apparatus,  
461 and peripheral lysosomes (Fig. 9 C, E, arrows). In contrast, GFP-KASHΔK-EF-*fue* (Fig. 9D),  
462 GFP-KASHΔK-EF-AA (Fig. 9 F) or GFP-KASHΔK-EF-mod2 (Fig. 9 G) had no effect on Golgi  
463 positioning or lysosome distribution, implying that these EF hand mutants were unable to  
464 sequester dynein.

465

466 To validate these findings biochemically, we used GFP trap beads to isolate KASH5DK WT or  
467 EF hand mutants from HeLaM cells, and then used antibodies directed against endogenous  
468 IC and dynactin p150 to reveal which KASH5 constructs could form a stable complex with  
469 dynein and dynactin. Unmodified GFP-KASH5ΔK co-precipitated with dynein and dynactin,  
470 as did KASH5-mod1 (Fig. 9 H). However, the dynein and dynactin interaction was lost for the  
471 KASH5-EF-*fue*, EF-AA, or EF-mod2 mutants. Taken together, these findings show that the  
472 KASH5 EF hand is critical for its function with dynein and dynactin, although the interaction  
473 is not calcium-dependent.

474

475

## 476 **Discussion**

477 Infertility will affect approximately 1 in 7 couples trying to conceive and has extraordinarily  
478 detrimental effects on those affected. Despite this, surprisingly little is known about the  
479 multitude of molecular and genetic causes of infertility in both males and females. This is  
480 largely due to the complexity of meiosis, pronuclear migration, and a lack of samples to  
481 study from sterile populations. Cytoplasmic dynein-1 is responsible for generating the  
482 mechanical force required for the dynamic chromosome movements in meiotic prophase I,  
483 which are essential for both meiotic progression and to maintain genetic integrity. KASH5,  
484 the mammalian LINC complex component that spans the nuclear envelope, along with  
485 SUN1/2, to link dynein to telomeres, is essential for synapsis and meiotic progression (Horn  
486 et al., 2013; Morimoto et al., 2012). Here, we identify KASH5 as a novel activating adaptor  
487 for dynein, the first trans-membrane protein with this role. We have mapped an important  
488 dynein-KASH5 interaction domain and shown this to be the region (LIC1 residues 388-458)  
489 containing the alpha-helix that mediates dynein's interaction with a plethora of other cargo  
490 adaptor proteins (Celestino et al., 2019; Lee et al., 2020; Lee et al., 2018). As such, KASH5



491 competes with established dynein adaptors—BICD2 and FIP3—for dynein binding.  
492 Expression of a cytosolic truncation of KASH5 inhibits dynein interphase function (Fig. 7), as  
493 seen for other dynein adaptor constructs that cannot bind cargo (Hoogenraad et al., 2001;  
494 Hoogenraad et al., 2003; Horgan et al., 2010a; Horgan et al., 2010b; Splinter et al., 2012).  
495 Our *in vitro* assays (Fig. 8) confirm that KASH5 is an activating dynein adaptor (McKenney et  
496 al., 2014; Schlager et al., 2014a; Schlager et al., 2014b) as KASH5, in the presence of LIS1 and  
497 dynactin, promotes motility of purified dynein molecules (Fig. 8).  
498  
499 *In vivo*, however, KASH5-dynein-dynactin complexes will not be acting individually. It is  
500 estimated that there are ~80 LINC complexes per telomere (Spindler et al., 2019), providing  
501 an upper limit to the number of points where dynein motors can engage with the  
502 cytoplasmic face of the nuclear envelope. If KASH5 can bind more than one dynein motor  
503 per dynactin (Grotjahn et al., 2018; Urnavicius et al., 2018), then there could be 160 dyneins  
504 per telomere. It is obvious that considerable force must be exerted to move chromosomes  
505 around within the nucleoplasm to promote synapsis, and this could be provided by such an  
506 ensemble of dyneins. Importantly, we find that KASH5 recruits LIS1 as well as dynein and  
507 dynactin, and that LIS1 is needed for dynactin recruitment to KASH5. LIS1 is crucial for  
508 dynein function where high force is needed (Chapman et al., 2019; Markus et al., 2020;  
509 Pandey and Smith, 2011; Reddy et al., 2016; Yi et al., 2011), and has recently been shown to  
510 increase force generation of dynein-dynactin complexes *in vitro* by promoting the  
511 recruitment of two dynein motors per dynactin (Elshenawy et al., 2020; Htet et al., 2020;  
512 Markus et al., 2020).  
513  
514 LIS1 is thought to promote adaptor binding by opening the dynein phi complex to allow  
515 easier assembly of the dynein/dynactin/adaptor complex (Elshenawy et al., 2020; Gillies et  
516 al., 2022; Htet et al., 2020; Marzo et al., 2020; Qiu et al., 2019). Indeed, in cells, LIS1  
517 enhances dynein and dynactin recruitment to a wide range of cellular cargoes (Cockell et al.,  
518 2004; Dix et al., 2013; Dzhindzhev et al., 2005; Lam et al., 2010; Siller et al., 2005; Sitaram et  
519 al., 2012; Splinter et al., 2012; Wang et al., 2013). Our data suggest that LIS1 is essential for  
520 recruiting dynactin to KASH5 (Fig. S1). Surprisingly, however, LIS1 depletion had much less  
521 effect on dynein recruitment. We also found that interfering with dynein IC-dynactin p150  
522 interactions either by IC2 depletion or by over-expression of p150 CC1, did not prevent

523 dynein recruitment to KASH5. Based on these data, we propose that the first step in KASH5  
524 adaptor complex assembly is an interaction between the LIC helix 1 and the adaptor. The  
525 subsequent binding of LIS1 then opens the Phi complex. The third step involves recruitment  
526 of the dynactin complex initiated by the IC-p150 interaction, followed by the formation of  
527 extensive contacts between the rest of the dynactin complex and the adaptor (Chowdhury  
528 et al., 2015; Grotjahn et al., 2018; Lau et al., 2021; Lee et al., 2020; Urnavicius et al., 2018;  
529 Urnavicius et al., 2015; Zhang et al., 2017). An interesting question is whether dynein's  
530 conformation (phi or open) affects its ability to bind adaptors, or subsequently recruit  
531 dynactin. If so, then LIS1 binding may regulate adaptor complex assembly *per se*. This KASH5  
532 pathway contrasts with the association of dynein with the nuclear envelope at late  
533 G2/prophase, where the recruitment of dynein and dynactin are interdependent  
534 (Raaijmakers et al., 2013). The mechanism of dynein-dynactin-adaptor assembly may  
535 therefore depend on the adaptor and cellular context. While LIS1 does not remain in motile  
536 complexes with dynein and dynactin *in vitro* (Elshenawy et al., 2020; Htet et al., 2020), it  
537 appears to be a stable component of at least some DDA complexes *in vivo* because it is  
538 recruited to KASH5 at the nuclear envelope. It is also found along with dynein and dynactin  
539 in KASH5 (Fig. 1; (Horn et al., 2013)) and BICD2 pull-downs (Splinter et al., 2012). It is also  
540 required for dynein-dynactin recruitment to the nuclear envelope in late G2/prophase  
541 (Raaijmakers et al., 2013). Understanding fully the *in vivo* role of LIS1 in dynein-dynactin-  
542 adaptor function is a key challenge for the future.

543

544 KASH5 interacts with LICs via its N-terminal EF-hand domain, like the activating adaptors  
545 FIP3, CRACR2a, Rab45 and ninein (Celestino et al., 2019; Lee et al., 2020; Reck-Peterson et  
546 al., 2018; Wang et al., 2019). EF-hands are known for their regulation by calcium, and  
547 CRACR2a-dynein interactions are calcium-dependent (Wang et al., 2019). However, recent  
548 work has revealed that not all EF hand adaptors bind calcium, and calcium binding does not  
549 necessarily mean that the cellular function of the EF hand is regulated by calcium levels (Lee  
550 et al., 2020; Wang et al., 2019). Similarly, neither KASH5-dynein nor FIP3-dynein interactions  
551 were affected by depleting cells of calcium (Fig. S6), and the KASH5 EF-hands lack key  
552 residues known to be essential for calcium binding (Fig. 9 A). However, the structure of the  
553 KASH5 EF-hand is clearly vital, since mutating the X and Y positions of both EF-hands to  
554 alanine ablated KASH5-dynein interactions (Fig. 9). Similar adverse effects on dynein-KASH5

555 complex formation following mutation of other residues in KASH5 EF-hands have been  
556 reported in a recent preprint (Agrawal et al., 2022). Importantly, our studies suggest why  
557 the *fue* mutation in the EF-hand (Lindeman and Pelegri, 2012) is detrimental in zebrafish  
558 development (Dekens et al., 2003; Lindeman and Pelegri, 2012), since replicating this  
559 mutation in KASH5 also interferes with its ability to bind dynein. Interestingly, zebrafish *fue*  
560 mutants are defective in pronuclear migration, despite a normal astral microtubule network  
561 (Dekens et al., 2003). Similarly, Zyg12, the *C. elegans* LINC complex KASH-domain protein  
562 that binds dynein LIC via a Hook domain, is needed for both pronuclear migration (Malone  
563 et al., 2003; Minn et al., 2009) and meiotic synapsis (Sato et al., 2009). Whether KASH5 plays  
564 a role in mammalian pro-nuclear migration remains to be determined.

565

566 As well as characterising KASH5 as a novel dynein activating adaptor, this study also  
567 provides insight into LIC function in cells. RNAi depletion suggested that either LIC can  
568 recruit dynein to KASH5 in cells (Fig. 3), and we have confirmed this using pull-downs with  
569 GFP-LIC1 (Figs. 4, 9) and by reconstituting KASH5-activated motility of recombinant dynein  
570 containing only LIC2 (Fig. 8). Similarly, we find that LICs 1 and 2 act redundantly for  
571 recruitment of dynein to RILP, and in the positioning of the Golgi apparatus and recycling,  
572 early and late endosomes in cells. We also show that the helix 1-containing region is  
573 essential for all these roles. This is in keeping with roles for Hooks (Christensen et al., 2021)  
574 and BicD2 (Hoogenraad et al., 2001; Hoogenraad et al., 2003; Splinter et al., 2012) at the  
575 Golgi apparatus, and Hooks (Christensen et al., 2021; Guo et al., 2016; Olenick et al., 2019;  
576 Villari et al., 2020), FIP3 (Horgan et al., 2010a; Horgan et al., 2010b) and RILP (Johansson et  
577 al., 2007; Jordens et al., 2001; Scherer et al., 2014; Tan et al., 2011) in endocytic organelle  
578 dynamics, since all of these adaptors can interact with both LICs (Celestino et al., 2019;  
579 Christensen et al., 2021; Lee et al., 2020; Lee et al., 2018; Schlager et al., 2014a; Schroeder  
580 et al., 2014; Schroeder and Vale, 2016; Urnavicius et al., 2018), although BicD2 may  
581 preferentially bind LIC1 in vivo (Goncalves et al., 2019). It is important to remember,  
582 however, that as yet there is no molecular explanation for why LIC1 is needed for motility of  
583 SNX8-labelled endosomal tubules whereas LIC2-dynein moves SNX1 and SNX4 tubules (Hunt  
584 et al., 2013).

585

586 Other isoform-specific roles for LICs have been described (see introduction), particularly in  
587 mitosis, where it has been proposed that LIC phosphorylation, coupled with Pin1 binding,  
588 may help control which adaptors bind to LIC1 and LIC2 during mitosis (Kumari et al., 2021a;  
589 Kumari et al., 2021b). LIC phosphorylation, notably in the region just upstream of helix 1,  
590 also plays a key role in switching dynein from interphase to mitotic cargos (Addinall et al.,  
591 2001; Dwivedi et al., 2019; Kumari et al., 2021a; Niclas et al., 1996). This may explain why  
592 KASH5 or BICD2N expression had little or no effect on mitotic spindle morphology (Fig. S5),  
593 even though they disrupt dynein's interphase functions. Phosphorylation of the adaptors  
594 themselves could potentially play a part in cell cycle control as well, since mitotic  
595 phosphorylation sites have been identified in, or close to, LIC binding domains in Hooks 1-3,  
596 BICD2 and FIP3 (Collins et al., 2012; Dephoure et al., 2008; Olsen et al., 2010; Wortzel et al.,  
597 2021). We can speculate that KASH5-LIC interactions, while vital in the prolonged prophase  
598 of meiosis I, would not be required, or could be detrimental, once cells enter pro-  
599 metaphase and throughout meiosis II. In support of this idea, we do not see accumulation of  
600 KASH5-containing membranes at mitotic spindle poles in our HeLa cell model. Cell cycle  
601 control of KASH5-LIC interactions will be a key area for future work.

602

603 Altogether, we have shown that KASH5 is a novel trans-membrane member of the dynein  
604 activating adaptor protein class, mapped its interaction with dynein LICs, and demonstrated  
605 that the KASH5 EF hands are critical for this process. This work also sheds light on order in  
606 which dynein-dynactin-adaptor complexes assemble in cells, and the involvement of LIS1 in  
607 this process.

## 608 **Materials and Methods**

### 609 **Antibodies and constructs**

610 The following mouse antibodies were used: dynein IC (IC74, MAB1618, Millipore;  
611 RRID:AB\_2246059); EEA1 (Clone 14, BD Biosciences; RRID:AB\_397830); LAMP1 (Clone H4A3,  
612 Developmental Studies Hybridoma Bank, RRID:AB\_2296838; or Abcam, RRID:AB\_470708);  
613 LIS1 (Sigma-Aldrich L7391; RRID:AB\_260418); dynactin p150 (BD Transduction Laboratories  
614 610473; RRID:AB\_397845); GFP (Roche 11814460001; RRID:AB\_390913); Myc-tag 9B11 (Cell  
615 signalling Technology 2276; RRID:AB\_331783); GM130 (BD Transduction Laboratories  
616 610822; RRID:AB\_398141); transferrin receptor (Clone MEM-189, MA1-19300,  
617 ThermoFisher/Zymed; RRID:AB\_2536952); and  $\alpha$ -tubulin DM1A (Sigma-Aldrich T9026;  
618 RRID:AB\_477593). The following rabbit antibodies were used: HA-tag (Sigma-Aldrich H6908;  
619 RRID:AB\_260070); LAMP1 (Cell Signalling D2D11, monoclonal; RRID:AB\_2687579); EEA1  
620 (Cell Signalling Technology C45B10, monoclonal; RRID:AB\_2096811); LIC1 (Cambridge  
621 Bioscience HPA035013, polyclonal; RRID:AB\_10600807); LIC2 (Abcam ab178702,  
622 polyclonal); Nde1 (Proteintech, 10233-1-AP, polyclonal; RRID:AB\_2149877). For Fig. 5 A,  
623 chicken anti-LIC1 and rabbit anti-LIC2 (Tan et al., 2011) were kindly provided by Prof. R.  
624 Vallee, Columbia University Medical Centre, USA. Secondary antibodies: Licor IRDye  
625 secondary antibodies (800CW or 680RD); Alexa Fluor 488, Alexa Fluor 594, Cy3, or Cy5  
626 labelled donkey anti-mouse, -rabbit and -sheep (Jackson Immunoresearch).

627

### 628 **Constructs**

629 The following KASH5 constructs in pcDNA 4T/O have been previously described (Horn et al.,  
630 2013): GFP-KASH5; GFP-KASH5 $\Delta$ K; GFP-KASH5 $\Delta$ ND $\Delta$ K; GFP-KASH5 $\Delta$ CD $\Delta$ K; GFP-KASH5ND, as  
631 has a myc-SUN2 construct in pcDNA3.1(-). EF-hand mutants were made using HiFi assembly  
632 (New England Biolabs) by linearising GFP-KASH5 $\Delta$ K using Q5 polymerase with primers  
633 5'-GTCATGCGTGACTGGATTGCTG-3' and 5'-CGTGGAGTTGAGTATTTGCTCCTC-3' and inserting  
634 synthetic G-block sequences (Integrated DNA Technologies) encoding KASH5 bps 97-319  
635 with the appropriate mutations (see Fig. 9). HA-KASH5 $\Delta$ K was made by amplifying the  
636 KASH5 $\Delta$ K sequence using forward primer 5'-GCGCGGATCCGACCTGCCCGAGGGCCC-3' and  
637 reverse primer 5'-GCGCGAATTCTTATGGATGTCGAGTGACTCTGAGC-3', digesting with BamH1  
638 and EcoRI then ligating into pcDNA3.1 containing the HA tag sequence. For generating a  
639 stable cell line, full length GFP-KASH5 was inserted into the doxycyclin-inducible lentiviral

640 vector pTRIPZ (Open Biosystem, Singapore) after amplification using primers 5'-  
641 GCGCCTCGAGGACCTGCCCCGAGGGCCCGGT-3' and 5'-  
642 GCGCACGCGTTCACACTGGAGGGGGCTGGAGG-3' followed by digestion with XhoI and MluI.  
643 Full length nesprin2 $\alpha$ 2 was amplified from a HeLa cDNA library and inserted into pcDNA3.1  
644 downstream of GFP using XhoI and AflIII digestion to give GFP-N2 $\alpha$ 2. A version lacking the  
645 transmembrane and KASH domain was generated in the same vector to give GFP-N2 $\alpha$ 2 $\Delta$ K.  
646  
647 Silently-mutated siRNA resistant full length hLIC1-mKate, hLIC2-mKate and hLIC2-GFP have  
648 been previously described (Jones et al., 2014). RNAi-resistant full length LIC1 and LIC2 and  
649 LIC1 truncations were generated by PCR and restriction digest cloning into pEGFP-C3  
650 (Clontech) and used for rescue experiments. GFP-LIC1-CT2 encodes amino acids 1-456 of  
651 human LIC1 with the addition of the amino acid sequence ADPPDLN after the LIC1 C-  
652 terminus. GFP-LIC1-CT3 encodes amino acids 1-387 followed by ADPPDLN. N-terminally  
653 Myc-tagged versions of full length human LIC1, LIC1-CT2 and LIC1-CT3 were generated using  
654 the forward primer 5'-CAGCTGGTACCGCGCCGTGGGGCGAGTC-3'. The reverse primers  
655 were 5'-TCGAATCTAGACTAAGAAGCTTCTCTTCCGTAGGAGATG-3' (full length LIC1), 5'-  
656 TCGAATCTAGACTAAGAGCCAGTCTTTTTACTCAACAAAC-3' (LIC1-CT2) and  
657 TCGAATCTAGACTATGGTGGTTGCTTTGCTAAAAGGGAC (LIC1-CT3), with no additional C-  
658 terminal amino acids. PCR products were inserted into pcDNA-3.1 downstream of a myc-tag  
659 sequence using KpnI and XbaI digestion.  
660  
661 Vectors encoding mCherry-chicken p50 and RFP-CC1 have been previously described  
662 (Wozniak et al., 2009). To generate GFP-BICD2N, the DNA sequence encoding amino acids 2-  
663 402 of mouse BICD2 was amplified using forward primer, 5'-  
664 GCGCGAATTCGTGCGCGCCGTGCGGAGGAG-3'; reverse primer, 5'-  
665 GCGCGGATCCTCACAGGCGCCGAGGGCACT-3', then cloned into pEGFP-C1 (Clontech) using  
666 EcoRI and BamHI. Other constructs were generous gifts from the following colleagues:  
667 pMDG2.1-VSV-G and p8.91-Gag-Pol vectors (Apolonia et al., 2015; Zufferey et al., 1997), Dr  
668 M. Malim (King's College London, UK); GFP-Rab11-FIP3 and GFP-Rab11-FIP3 I737E, (Wilson  
669 et al., 2005), Prof. G. Gould (University of Glasgow, UK); pEGFP-C1 containing hRILP (Colucci  
670 et al., 2005), Prof. Cecilia Bucci (University of Salento, Italy); pCB6-HA-RILP, Dr Mark Dodding  
671 (University of Bristol, UK).

672

### 673 **Cell lines and transfection**

674 HeLa and hTERT-RPE cells were obtained from ATCC; Vero cells were purchased from  
675 European Collection of Authenticated Cell Cultures. HeLaM cells were kindly provided by Dr  
676 Andrew Peden, University of Sheffield, UK. Mycoplasma testing was routinely performed by  
677 DAPI staining.

678

679 HeLa, HeLaM, HEK293T and Vero cells were maintained in DMEM supplemented with 10%  
680 FBS at 8.0% CO<sub>2</sub> and 37°C. To generate cells stably expressing human GFP-KASH5, HeLa cells  
681 were transfected with pTRIPZ-GFP-KASH5, pMDG2.1-VSV-G and p8.91-GAG-POL in a ratio of  
682 4:1:2 to a total of 10 µg of DNA using Lipofectamine 2000 (ThermoFisher) as per the  
683 manufacturer's instructions overnight. Virus was then collected and passed through a 0.45  
684 µm filter before addition to cells for 4 hours. Transduced cells were selected for with fresh  
685 media containing puromycin (3µg/ml). Induction of GFP-KASH5 expression was induced with  
686 doxycycline (500ng/ml) for 16 hours. Transient transfection of HeLaM and Vero cells on #1.5  
687 coverslips was achieved using JetPEI (PolyPlus transfection), using half the manufacturer's  
688 recommended amounts of total DNA and JetPEI. Expression levels were carefully titrated for  
689 each plasmid, in some cases using dilution with carrier DNA (pBluescript SK-II) (Flores-  
690 Rodriguez et al., 2011), to avoid over-expression artefacts. For biochemical analysis, cells  
691 were transfected in 10 cm dishes using either JetPEI or PEI (Sigma 408727). PEI was  
692 dissolved at 1 mg/ml in 150 mM NaCl by incubation at 50°C, sterile filtered and stored in  
693 aliquots at -80°C. Per dish, 16 µg of total DNA was diluted in 200 µl Opti-MEM (Gibco  
694 319850), 48 µl of PEI was added to another 200 µl Opti-MEM, then after 5 min the PEI was  
695 added to the DNA mix and incubated for 30 min at room temperature before adding to the  
696 cells.

697

### 698 **Short interfering RNA (siRNA) methods**

699 For depletion of target genes, siRNA transfections used INTERFERin (PolyPlus transfection).  
700 siRNAs targeting the ORF of human LIC1 and LIC2 were obtained from Eurofins MWG  
701 Operon. Oligonucleotides were applied to HeLaM cells at a final concentration of 5-20 nM  
702 (for HeLaM) or 20 nM (for GFP-KASH5 HeLas) per target for 72 hours before analysis by  
703 immunoblot and immunofluorescence. The following sequences were used, synthesised by

704 Eurofins MWG with dTdT overhangs: LIC1, 5'-AGAUGACAGUGUAGUUGUA-3'; LIC2, 5'-  
705 ACCUCGACUUGUUGUAUAA-3' (Jones et al., 2014; Palmer et al., 2009); LIS1, 5'-  
706 GAACAAGCGAUGCAUGAAG-3' (Lam et al., 2010; Tsai et al., 2005). For IC2, a SMARTpool  
707 (Thermo Scientific Dharmacon) was used consisting of a mixture of four siRNAs: 5'-  
708 GUAAAGCUUUGGACAACUA-3'; 5'-GAUGUUAUGUGGUCACCUA-3'; 5'-  
709 GCAUUUCUGUGGAGGGUAA-3'; 5'-GUGGUUAGUUGUUUGGAUU-3'. Control RNAi  
710 experiments were performed either using siGENOME lamin A/C Control (ThermoFisher  
711 Scientific: Fig. 5 A-C, 6 A, B) or ON-TARGET-plus Non-targeting siRNA #1 (Thermo Scientific  
712 Dharmacon).

713

714 For LIC rescue experiments analysed by immunofluorescence, cells were transfected with  
715 scrambled or LIC1 and LIC2 siRNAs for 48 h using INTERFERin (PolyPlus transfection), and  
716 then transfected in fresh media with siRNA-resistant GFP-LIC-FL, GFP-LIC1-CT2 or GFP-LIC1-  
717 CT3 using PEI or JetPEI (Fig. 4 C) with 72 hours total knock-down. In Fig. 3 E, LIC1 and 2-  
718 depleted cells were transfected after 48 hours with the indicated constructs using FuGENE6  
719 and left for a further 24 hours.

720

## 721 Immunoblotting

722 For validating siRNA knock-down efficiency, lysates were collected 72 hours post siRNA  
723 addition in RIPA lysis buffer (Sigma-Aldrich R0278) supplemented with cOmplete ULTRA  
724 protease inhibitor (Roche 5892791001) and PhosSTOP (Roche PHOSS-RO) phosphatase  
725 inhibitor. A total of 20 µg of protein was loaded per well diluted in denaturing SDS loading  
726 buffer, and protein samples were separated using 12% polyacrylamide gels before being  
727 transferred to PVDF membranes. Membranes were blocked in 1x alpha-casein buffer  
728 (Sigma-Aldrich B6429) diluted in tris-buffered saline (TBS: 20 mM Tris/HCl, pH 7.7, 150 mM  
729 NaCl) for 1 hour at room temperature. Primary antibodies were diluted in 1x alpha-casein  
730 diluted in TBS supplemented with 0.01% Tween-20 (TBST) and incubated at 4°C overnight.  
731 Membranes were washed three times in TBST and incubated with Licor IRDye secondary  
732 antibodies (800CW or 680RD) diluted 1:10,000 in 1x alpha-casein in TBST for 1 hour at room  
733 temperature. Blots were washed three times in TBST and once in water before imaging on a  
734 Licor Odyssey or Odyssey CLx using Image Studio software.

735



### 736 **GFP-Trap immunoprecipitation**

737 For LIC truncation experiments, HeLaM cells were depleted of endogenous LIC1 and LIC2  
738 and transiently transfected as described above. Cells were washed with ice cold PBS and  
739 lysed in IP lysis buffer (50 mM Tris, pH 7.5, 10 mM NaCl, 2.5 mM MgCl<sub>2</sub>, 1 mM DTT, 0.01%  
740 digitonin [Calbiochem 300410] and protease inhibitors, 10 µg/ml aprotinin [Sigma A6103],  
741 leupeptin [Calbiochem 108976] and pepstatin [Alfa Aesar J60237]) before centrifugation at  
742 17,000 rpm for 30 mins at 4°C in a microcentrifuge. A tenth of the supernatant was taken as  
743 an input sample, and the remaining supernatant was rotated at 4°C for 2 hours with  
744 ChromoTek GFP-Trap® magnetic agarose beads pre-washed in IP wash buffer (50 mM Tris,  
745 pH 7.5, 10 mM NaCl, 1 mM DTT and protease inhibitors). Beads were isolated and washed  
746 three times in IP wash buffer and proteins eluted by boiling at 95°C in SDS-PAGE sample  
747 buffer before analysis by SDS-PAGE and immunoblotting.

### 749 **BAPTA-AM treatment**

750 HeLaM cells were grown on uncoated #1.5 glass coverslips and Vero cells were grown on  
751 coverslips coated with 1µg/ml Fibronectin (Sigma F0895). Cells were treated with either 10  
752 µM BAPTA-AM (abcam ab120503) or DMSO vehicle control for 2 hours before fixation and  
753 immunofluorescence labelling.

### 755 **Immunofluorescence**

756 HeLaM or Vero cells were grown on #1.5 coverslips at appropriate density. For EEA1  
757 antibody labelling cells were fixed for 20 mins in 3% formaldehyde in PBS at RT. After  
758 washing, unreacted formaldehyde was quenched with glycine (0.1 M) and permeabilised in  
759 0.1% Triton X-100 in PBS for 10 mins before PBS wash prior to antibody labelling. For mitotic  
760 spindle imaging, cells were fixed using formaldehyde/glutaraldehyde in a microtubule-  
761 stabilising buffer containing 1% Triton-X100, as previously described in detail (Jones et al.,  
762 2014). For all other antibody labelling, cells were fixed in methanol for 10 minutes at -20°C  
763 and washed in PBS. Secondary antibodies labelled with Alexa Fluor 488, Alexa Fluor 594,  
764 Cy3, or Cy5 were used along with 1 µg/ml DAPI, and samples were mounted in ProLong Gold  
765 (Invitrogen). For LIS1 antibody labelling (Baffet et al., 2015), coverslips were washed once in  
766 PBS then incubated for 1 min in PHEM buffer (60 mM PIPES, 25 mM HEPES, 10 mM EGTA,  
767 2mM MgCl<sub>2</sub>, pH 6.9) containing 0.5% Triton X-100. Cells were then transferred to PHEM

768 buffer supplemented with 3.7% paraformaldehyde for 20 minutes. This was followed by  
769 incubation in 0.2% Triton X-100 in PBS for 5 minutes. Coverslips were rinsed in PBS and  
770 quenched with glycine before labelling.

771

## 772 **Imaging and analysis**

773 Fixed HeLaM (Fig. 4; 5 E; 6 C, D; 7 B, C and 9) and Vero cells (Fig. S5 B) were imaged using an  
774 Olympus BX60 or BX50 microscope (Olympus Keymed) with a Plan apochromat 60X 1.4 N.A.  
775 oil immersion objective, COOLED light source (COOLED Ltd) or 100W Hg lamp, CoolSNAP ES  
776 CCD camera (Teledyne Photometrics) and MetaVue software (Molecular Devices).

777 Subsequent image analysis was performed using MetaVue and ImageJ software. The  
778 imaging in Fig. 1-3, 5 A, 7 A and S4 A was performed on a IX71 microscope (Olympus) which  
779 was equipped for optical sectioning by a DeltaVision CORE system (GE Healthcare) with z-  
780 spacing fixed at 0.2  $\mu\text{m}$ . Plan Apochromat 60X 1.4 N.A. or UPlanFI 100X 1.35 N.A. oil  
781 immersion objective lenses (Olympus) were used with a CoolSNAP HQ CCD camera  
782 (Photometrics). Deconvolution was completed using SoftWorX (Applied Precision) and  
783 images are displayed as z-projections.

784

785 Line scans were generated using Image J using the plot profile tool, with the lines starting in  
786 the cytoplasm. Data was exported and plotted as graphs in GraphPad Prism. ImageJ was  
787 used to generate inverted greyscale images, merge channels and draw cell outlines, using  
788 contrast-adjusted images as a guide, where needed. Some images were prepared and  
789 annotated using Adobe Photoshop. For phenotype scoring, each experiment was performed  
790 at least three times, and the number of cells manually scored are given in the Figure  
791 legends. Examples of the Golgi apparatus, early endosome and lysosome phenotypes are  
792 shown in Fig. S3. For dynein recruitment to KASH5 in Fig. 3 D and Fig. S2 D, cells were scored  
793 in a binary fashion as to whether dynein or dynactin could be seen at the nuclear envelope.  
794 For these data, statistical tests were not deemed appropriate as there was no variation in  
795 some control conditions, with all cells recruiting dynein/dynactin to KASH5. For other  
796 datasets, the statistical tests used are given in the figure legends. All analysis and graph  
797 preparation of statistics throughout this project was performed in GraphPad Prism 6  
798 (GraphPad Software). For experiments where one condition was compared to a control an  
799 unpaired t-test was used. For experiments where multiple conditions were compared to one

800 control mean a one- or two-way ANOVA with Dunnett's post-hoc test were used. The p  
801 values are represented using the following method:  $p \leq 0.05 = *$ ,  $p \leq 0.01 = **$ ,  $p \leq 0.001 = ***$  and  
802  $p \leq 0.0001 = ****$ . Figures were assembled using Adobe Illustrator (Adobe) or Affinity  
803 Designer (Serif Europe Ltd).

804

### 805 **Recombinant KASH5 protein expression and purification**

806 Constructs of human KASH5 (amino acid residues: 1-407, 1-460 and 1-507) were cloned into  
807 pMAT11 vector (Peranen et al., 1996) for expression with N-terminal TEV-cleavable His<sub>6</sub>-  
808 MBP tag. KASH5 constructs were expressed in BL21 (DE3) cells (Novagen), in 2xYT media,  
809 induced with 0.5 mM IPTG for 16 hr at 25°C. Bacterial pellets were harvested, resuspended  
810 in 20mM Tris pH 8.0, 500 mM KCl and lysed using a TS Cell Disruptor (Constant Systems) at  
811 172 MPa. Cellular debris were later removed by centrifugation at 40,000 g. KASH5 fusion  
812 proteins were purified through consecutive Ni-NTA (Qiagen), amylose (NEB), and HiTrap Q  
813 HP (Cytiva) ion exchange chromatography. The N-terminal His<sub>6</sub>-MBP tag was cleaved using  
814 TEV protease and the cleaved samples were further purified through HiTrap Q HP (Cytiva)  
815 ion exchange chromatography and size exclusion chromatography (HiLoad 16/600 Superdex  
816 200, Cytiva) in 20 mM HEPES pH 7.5, 150 mM KCl, 2 mM DTT. Purified KASH5 protein  
817 samples were spin concentrated using Amicon® Ultra centrifugal filter device (10,000  
818 NMWL), flash-frozen in liquid nitrogen and stored at -80°C. Purified KASH5 proteins were  
819 analysed using SDS-PAGE and visualised with Coomassie staining. Protein concentrations  
820 were determined using Cary 60 UV spectrophotometer (Agilent) with extinction coefficients  
821 and molecular weights calculated by ProtParam (<http://web.expasy.org/protparam/>).

822

### 823 **Multi-angle light scattering coupled with size exclusion chromatography (SEC-MALS)**

824 The absolute molar masses of KASH5 protein samples were determined by multi-angle light  
825 scattering coupled with size exclusion chromatography (SEC-MALS). KASH5 protein samples  
826 at  $> 1.5 \text{ mg ml}^{-1}$  were loaded onto a Superdex™ 200 Increase 10/300 GL size exclusion  
827 chromatography column (Cytiva) in 20 mM Tris pH 8.0, 150 mM KCl, 2 mM DTT, at  
828  $0.5 \text{ ml min}^{-1}$ , in line with a DAWN® HELEOS™ II MALS detector (Wyatt Technology) and an  
829 Optilab® T-rEX™ differential refractometer (Wyatt Technology). Differential refractive index  
830 and light scattering data were collected and analysed using ASTRA® 6 software (Wyatt  
831 Technology). Molecular weights and estimated errors were calculated across eluted peaks

832 by extrapolation from Zimm plots using a  $dn/dc$  value of  $0.1850 \text{ ml g}^{-1}$ . Bovine serum  
833 albumin (ThermoFisher) was used as the calibration standard.

834

### 835 **Protein purification**

836 Full length human cytoplasmic dynein-1 (Schlager et al., 2014a) and human LIS1 (Baumbach  
837 et al., 2017) were expressed using the *Sf9*/baculovirus system and purified as previously  
838 described (Baumbach et al., 2017; Schlager et al., 2014a). Pellets from 1 L of *Sf9* cell culture  
839 were suspended in 50 ml lysis buffer (50 mM HEPES pH 7.2, 100 mM NaCl, 1 mM DTT, 0.1  
840 mM Mg.ATP, 10% Glycerol), supplemented with one cOmplete tablet (Roche) and 1mM  
841 PMSF. Cells were lysed using a Dounce homogeniser at 4°C, then lysate clarified for 45 mins  
842 at  $500,000 \times g$ . The supernatant was incubated with 1.5 ml pre-equilibrated IgG beads  
843 (Cytiva) for 3 h. Beads were washed with 200 ml lysis buffer. For dynein, beads were then  
844 transferred to a 2 ml tube, adding 10  $\mu\text{M}$  SNAP-Cell TMR-Star dye (New England Biolabs)  
845 and incubating for 1 h at 4°C. Beads for both constructs were then washed with 100 ml TEV  
846 buffer (50 mM Tris-HCl pH 7.4, 148 mM K-acetate, 2 mM Mg-acetate, 1 mM EGTA, 10%  
847 Glycerol, 0.1 mM Mg.ATP, 1 mM DTT), then transferred again to a 2 ml tube, adding 400  $\mu\text{g}$   
848 TEV protease and incubating overnight at 4°C. Sample was then concentrated and gel  
849 filtered using a G4000<sub>SWXL</sub> 7.8/300 column (TOSOH Bioscience) into GF150 buffer (25 mM  
850 HEPES pH 7.2, 150 mM KCl, 1 mM MgCl<sub>2</sub>, 5 mM DTT, 0.1 mM Mg.ATP) for dynein, or TEV  
851 buffer for Lis1. Peak fractions were concentrated and snap-frozen in liquid nitrogen.

852

853 Dynactin was purified from frozen porcine brains as previously described (Urnavicius et al.,  
854 2015). Porcine brains were blended with 300 ml homogenisation buffer (35 mM PIPES pH  
855 7.2, 5 mM MgSO<sub>4</sub>, 1 M KCl, 200  $\mu\text{M}$  EGTA, 100  $\mu\text{M}$  EDTA, 1 mM DTT) supplemented with  
856 four cOmplete tablets and 1mM PMSF until just thawed. The lysate was then clarified in two  
857 steps: 15 mins at  $38,400 \times g$  at 4°C, then 50 mins at  $235,000 \times g$  at 4°C. All subsequent steps  
858 were carried out at 4°C The supernatant was then filtered through a GF filter then a 0.45  $\mu\text{m}$   
859 filter, then loaded onto an SP Sepharose column (Cytiva), equilibrated with SP buffer A (35  
860 mM PIPES pH 7.2, 5 mM MgSO<sub>4</sub>, 1 mM EGTA, 0.5 mM EDTA, 1 mM DTT, 0.1 mM Mg.ATP).  
861 The resin was then washed until white using 99.5% SP buffer A/0.5% SP buffer B (35 mM  
862 PIPES pH 7.2, 5 mM MgSO<sub>4</sub>, 1 M KCl, 1 mM EGTA, 0.5 mM EDTA, 1 mM DTT, 0.1 mM  
863 Mg.ATP), then dynactin was eluted using a gradient from 0.5-25% (% SP buffer B). Dynactin-

864 containing fractions were then filtered through a 0.22  $\mu\text{m}$  filter, then loaded onto a Mono Q  
865 HR 16/60 column (Cytiva), pre-equilibrated with Mono Q buffer A (35 mM PIPES pH 7.2, 5  
866 mM  $\text{MgSO}_4$ , 200  $\mu\text{M}$  EGTA, 100  $\mu\text{M}$  EDTA, 1 mM DTT). This column was washed with 10 CV  
867 Mono Q buffer A, then dynactin eluted using a 15-35% gradient (% Mono Q buffer B, 35 mM  
868 PIPES pH 7.2, 5 mM  $\text{MgSO}_4$ , 1 M KCl, 200  $\mu\text{M}$  EGTA, 100  $\mu\text{M}$  EDTA, 1 mM DTT). Peak  
869 fractions were concentrated and gel filtered using a G4000<sub>SW</sub> 21.5/600 column (TOSOH  
870 Bioscience) into GF150 buffer, with the peak concentrated and snap-frozen in liquid  
871 nitrogen.

872

873 Strep-tagged human Hook3 (1-522) (Urnavicius et al., 2018) was purified using the  
874 Sf9/baculovirus system as previously described (Urnavicius et al., 2018). A pellet from 500  
875 ml of Sf9 culture was thawed using 50 ml Strep-tag lysis buffer (30 mM HEPES pH 7.2, 50  
876 mM K-Acetate, 2 mM Mg-Acetate, 1 mM EGTA, 10% Glycerol, 1 mM DTT) plus one  
877 cComplete tablet and 1 mM PMSF. Cells were then lysed using a Dounce homogeniser, with  
878 the lysate clarified for 20 minutes at 50,000  $\times g$  at 4°C. Supernatant was filtered using a GF  
879 filter, then flown onto a StrepTrap HP 1 ml column (Cytiva) at 4°C. Washed using 40 CV  
880 Strep-tag lysis buffer, then eluted with 3 mM desthiobiotin. Peak fractions were  
881 concentrated and gel filtered using a Superose 6 10/300 Increase column (Cytiva) into  
882 GF150 buffer. The monodisperse peak was concentrated and snap-frozen in liquid nitrogen.

883

#### 884 ***in vitro* TIRF motility assays**

885 *in vitro* TIRF assays were carried out as previously (Urnavicius et al., 2018). Microtubules  
886 were typically prepared the day before the assay. Microtubules were made by mixing 1  $\mu\text{l}$  of  
887 HiLyte Fluor 488 tubulin (2 mg/ml, Cytoskeleton), 2  $\mu\text{l}$  biotinylated tubulin (2 mg/ml,  
888 Cytoskeleton) and 7  $\mu\text{l}$  unlabelled pig tubulin (Schlager et al., 2014a) (6 mg/ml) in BRB80  
889 buffer (80 mM PIPES pH 6.8, 1 mM  $\text{MgCl}_2$ , 1 mM EGTA, 1 mM DTT). 10  $\mu\text{l}$  of polymerization  
890 buffer (2 $\times$  BRB80 buffer, 20% (v/v) DMSO, 2 mM Mg.GTP) was added, then the solution was  
891 incubated at 37°C for 1 h for microtubule polymerization. The sample was diluted with 100  
892  $\mu\text{l}$  of MT buffer (BRB80 supplemented with 40  $\mu\text{M}$  paclitaxel), then centrifuged at 21,000  $\times g$   
893 for 9 minutes at room temperature to remove soluble tubulin. The resulting pellet was  
894 gently resuspended in 100  $\mu\text{l}$  of MT buffer, then centrifuged again as above. 50  $\mu\text{l}$  MT buffer  
895 was then added, with the microtubule solution then stored in a light-proof container. Before

896 usage, and every 5 hours during data collection, microtubule solution was spun again at  
897 21,000 x *g* for 9 minutes, with the pellet resuspended in the equivalent amount of MT  
898 buffer.

899

900 Assay chambers were prepared by applying two strips of double-sided tape on a glass slide,  
901 creating a channel, then placing a piranha-solution-cleaned coverslip on top. The coverslip  
902 was then functionalized using PLL-PEG-Biotin (SuSOS), washed with 50  $\mu$ l of TIRF buffer (30  
903 mM HEPES pH 7.2, 5 MgSO<sub>4</sub>, 1 mM EGTA, 2 mM DTT), then incubated with streptavidin (1  
904 mg/ml, New England Biolabs). The chamber was again washed with TIRF buffer, then  
905 incubated with 10  $\mu$ l of a fresh dilution of microtubules (2  $\mu$ l of microtubules diluted into 10  
906  $\mu$ l TIRF-Casein buffer (TIRF buffer supplemented with 50 mM KCl and 1 mg/ml casein)) for 1  
907 min. Chambers were then blocked with 50  $\mu$ l blocking buffer.

908

909 Complexes were prepared mixing 1.5  $\mu$ l of each component at the following concentrations:  
910 dynein at 0.3  $\mu$ M, dynactin at 0.3  $\mu$ M, adaptor at 6  $\mu$ M, Lis1 at 50  $\mu$ M. GF150 buffer was  
911 added to a final volume of 6  $\mu$ l. Complexes were incubated on ice for 15 minutes then  
912 diluted with TIRF-Casein buffer to a final buffer of 15  $\mu$ l. Four microliters of complex were  
913 added to 16  $\mu$ l of TIRF-Casein buffer supplemented with an oxygen scavenging system (0.2  
914 mg/ml catalase, Merck; 1.5 mg/ml glucose oxidase, Merck; 0.45% (w/v) glucose) 1% BME, 5  
915 mM Mg.ATP. This mix was flown into the chamber.

916

917 The sample was imaged immediately at 23°C using a TIRF microscope (Nikon Eclipse Ti  
918 inverted microscope equipped with a Nikon 100x TIRF oil immersion objective). For each  
919 sample, a microtubule image was acquired using a 488 nm laser. Following this a 500-frame  
920 movie acquired (200 ms exposure, 4.1 fps) using a 561 nm laser. To analyse the data, ImageJ  
921 was used to generate kymographs from the tiff movie stacks. These kymographs were  
922 blinded, then events of similar length were picked to analyse velocity and number of  
923 processive events/ $\mu$ m microtubule/s, using criteria outlined previously (Schlager et al.,  
924 2014a; Urnavicius et al., 2018). Velocity was calculated using pixel size of 105 nm and frame  
925 rate of 235 ms/frame. Three replicates were taken for each sample, with velocities and  
926 number of processive events plotted using GraphPad Prism 7, using ANOVA with Tukey's  
927 multiple comparison to test significance.

928

## 929 **Supplementary material**

930 Fig. S1. demonstrates the effect of IC2 and LIS1 depletion on dynein and dynactin  
931 recruitment to KASH5. It also provides an illustration of the meiotic LINC complex and the  
932 role of dynein in meiotic prophase I. Fig. S2 shows immunoblot analysis demonstrating  
933 depletion of targets by RNAi. Fig. S3 depicts Golgi apparatus, early endosome, and lysosome  
934 phenotype categories used for the scoring shown in Figs. 5 and 6. Fig. S4 demonstrates that  
935 LICs act redundantly to recruit dynein and dynactin to RILP-positive late endosomes, and  
936 that dynein recruitment requires helix 1. Fig. S5 shows that the dominant negative  
937 overexpression of KASH5 or BICD2N does not cause a major mitotic spindle assembly defect.  
938 Fig. S6 depicts the effect of BAPTA-AM treatment on dynein recruitment to KASH5 and  
939 Rab11-FIP3. Table S1 documents the full statistical analysis of the effects of LIC1 and LIC2  
940 depletion on Golgi apparatus morphology shown in Fig. 5C.

941

## 942 **Acknowledgements**

943 The work in V. Allan's laboratory was funded by the Biotechnology and Biological Sciences  
944 Research Council (BB/N006933/1 and a Ph.D. studentship to E. Granger), the Medical  
945 Research Council (Ph.D. studentship to C. Villemant), and the University of Manchester. A.  
946 Salter was funded by the University of Manchester-A\*STAR Research Attachment  
947 Programme (ARAP). We thank Mr Quentin Roebuck for excellent technical assistance. The  
948 Bioimaging Facility microscopes used in this study were purchased with grants from BBSRC,  
949 Wellcome and the University of Manchester Strategic Fund. We would like to thank Drs  
950 Peter March and Graham Wright for their help with microscopy in Manchester and  
951 Singapore, respectively. The work in B. Burke's laboratory was funded by the Singapore  
952 Biomedical Research Council and the Singapore Agency for Science Technology and  
953 Research, A\*STAR. Funding for Singapore microscope? We are grateful to Dr Alessandra  
954 Calvi for generating the nesprin2 $\alpha$  construct. O. Davies is funded by a Wellcome Senior  
955 Research Fellowship (Grant Number 219413/Z/19/Z). C. Lau is funded by grants from the  
956 Wellcome Trust (WT210711) and the Medical Research Council, UK (MC\_UP\_A025\_1011),  
957 awarded to Dr. Andrew Carter. For the purpose of open access, the author has applied a CC  
958 BY public copyright licence to any Author Accepted Manuscript version arising from this  
959 submission.

960

961 The authors declare no competing financial interests.

962

963 **Author contributions**

964 Conceptualization: V. Allan, B. Burke. Funding acquisition: V. Allan, B. Burke. Designed and

965 performed experiments, and analysed data: A. Salter, K. Garner, V. Allan, C. Villemant, E.

966 Granger, M. Gurusaran, C. Lau, O. Davies. Generated molecular reagents: G. McNee, C.

967 Villemant, A. Salter, V. Allan, E. Granger. Purified proteins: C. Lau, M. Gurusaran.

968 Supervision: V. Allan, B. Burke, P. Woodman, O. Davies. Visualization/data presentation: A.

969 Salter, K. Garner, V. Allan, C. Villemant, E. Granger, M. Gurusaran, C. Lau. Writing the initial

970 draft: A. Salter, K. Garner, V. Allan. Review & editing: all authors.

971



972 **Figure legends**

973

974 **Figure 1. Recruitment of dynein, dynactin and LIS1 to KASH5 in HeLa cells.**

975 **(A)** A stable HeLa cell line inducibly expressing GFP-KASH5 (green) was labelled with  
976 antibodies against dynein IC and LIC1, dynactin p150 and p50, LIS1 and Nde1 (magenta) and  
977 imaged on a DeltaVision microscope. Images are z-projections of deconvolved image stacks.  
978 The bottom panel shows the transient expression of GFP-N2 $\alpha$ 2 in green and labelling with  
979 anti-LIC1 in magenta, with undeconvolved wide-field images. Arrowheads point out the  
980 location of centrosomes, full arrows show creases in the nuclear envelope and asterisks  
981 mark cytoplasmic accumulations of GFP-KASH5. Thin white lines on colour merge images  
982 show where a line scan plot was performed, shown on the right. Scale bars = 10  $\mu$ m. **(B)**  
983 Schematic showing KASH5 and the constructs used. For some experiments, the GFP was  
984 replaced with an HA tag. **(C)** Dynein, dynactin and LIS1 are recruited to KASH5 as shown by  
985 GFP-Trap pull-downs. HeLaM cells were transiently transfected with GFP-KASH5 $\Delta$ K or GFP-  
986 N2 $\alpha$ 2 $\Delta$ K. The pull-downs and inputs (1.5% of total lysate) were probed with antibodies  
987 against GFP, p150, IC, LIC1, LIC2, LIS1, BICD2 and  $\alpha$ -tubulin. Molecular weight markers are  
988 shown. **(D)** The KASH5 N-terminal EF-hand domain is sufficient to recruit dynein. Lysates of  
989 HeLaM cells expressing GFP, GFP-KASH5 $\Delta$ K (GFP-K5 $\Delta$ K) or GFP-KASH5 N terminus (GFP-  
990 K5ND) were isolated by GFP-trap and probed for LIC1 by immunoblotting. The input is 15%  
991 of the GFP-trap sample.

992

993 **Figure 2. Dynein and LIS1 recruitment to KASH5 does not require interaction between**  
994 **dynein IC and dynactin p150.**

995 **(A)** HeLa cells stably expressing GFP-KASH5 (green) were depleted of IC2 using 20 nM siRNA  
996 for 72 hours and then processed for immunofluorescence with antibodies against LIC1,  
997 dynactin p150 and LIS1 (magenta). White lines on colour merge images show where a line  
998 scan plot was performed, shown on the right. **(B)** HeLa cells were transiently transfected  
999 with GFP-KASH5, RFP-CC1 and myc-SUN2 (CC1 and SUN2: not shown. Cells expressing CC1  
1000 are marked with asterisks). Cells were fixed and labelled with antibodies against dynein IC  
1001 and LIC1, dynactin p50 and p150, and LIS1 (magenta in merges). Green lines on the GFP-  
1002 KASH5 images indicate line scan locations, shown on the right. Images were taken on a

1003 DeltaVision microscope and z-stack projections of deconvolved images are shown. Scale  
1004 bars = 10  $\mu$ m.

1005

1006 **Figure 3. Dynein is recruited to KASH5 via either LIC1 or 2.**

1007 **(A-D)** HeLa cells stably expressing GFP-KASH5 (green) were depleted of LIC1 **(A)**, LIC2 **(B)**, or  
1008 both LIC1 and 2 **(C)** using 10 nM of each siRNA for 72 hours, then fixed and labelled with  
1009 antibodies against IC, dynactin p150 or LIS1 (magenta). Thin white lines show where a line  
1010 scan plot was performed on LIC1&2 depleted cells, shown on the right. Images were taken  
1011 on a DeltaVision microscope and z-stack projections of deconvolved images are shown.  
1012 Scale bars = 10  $\mu$ m. **(D)** LIC depleted cells were scored in a binary fashion for recruitment of  
1013 IC, p150 or LIS1 to KASH5. The mean and standard deviation of each condition is shown. The  
1014 experiment was repeated three times, with 300 cells scored for each condition in each  
1015 experiment. **(E)** HeLaM cells were depleted with siRNA against both LICs together (10 nM  
1016 each), or with control siRNAs. 48 hours into the knockdown, cells were transfected with  
1017 either GFP-KASH5 $\Delta$ K or GFP-N2 $\alpha$ 2 $\Delta$ K. The following day cells were lysed and a GFP trap was  
1018 performed. Input and pull-downs were immunoblotted with antibodies against GFP, p150,  
1019 LIC1, LIC2, IC and  $\alpha$ -tubulin. The input was 1.5% of the total cell lysate. Molecular weight  
1020 markers are shown on the right.

1021

1022 **Figure 4. KASH5-LIC1 interactions require LIC1 helix 1.**

1023 **(A)** Schematic of LIC1 showing the N terminal GTPase-like domain that is highly conserved  
1024 between LIC1 and LIC2, and a less well conserved C terminal domain containing two alpha-  
1025 helices termed Helix 1 (440-456) and Helix 2 (493-502). Truncated versions of LIC1 were  
1026 generated that lacked Helix 2 (LIC1 CT2) or both Helix 1 and Helix 2 (LIC1 CT3). **(B)** HeLaM  
1027 cells were depleted of LIC1 and 2 using 5 nM of each siRNA for 48 hours. GFP-tagged LIC  
1028 truncation constructs were co-transfected with full-length HA-tagged KASH5 (and myc-  
1029 SUN2: not shown) for a further 24 hours, then fixed and labelled with antibodies to HA  
1030 (magenta) and imaged by wide-field microscopy. Scale bars = 10  $\mu$ m. **(C)** HeLaM cells were  
1031 depleted of both LICs by siRNAs for 48 hours, then co-transfected with Myc-tagged LIC1  
1032 constructs and GFP-KASH5ND or GFP as a control, and incubated for a further 24 hours. Cell  
1033 lysates were incubated with GFP-trap beads then analysed by SDS-PAGE and

1034 immunoblotting with antibodies to GFP, myc and IC (IC74) to detect native dynein. The  
1035 input is 15% of the GFP-trap sample.

1036

1037 **Figure 5. LICs 1 and 2 act redundantly in Golgi apparatus positioning, with helix 1 being**  
1038 **essential.**

1039 **(A-C)** HeLaM cells were depleted of LIC1, LIC2 or both LICs using 5 nM siRNA for each  
1040 subunit, then analysed by immunoblotting of lysates with antibodies to LIC1 and 2 (Tan et  
1041 al., 2011) **(A)**, or fixed and labelled with antibodies to GM130 and imaged on a DeltaVision  
1042 microscope to reveal the Golgi apparatus **(B)**. Z-projections of deconvolved images stacks  
1043 are shown. **(C)** Golgi morphology was scored manually as shown in Fig. S3 for 100 cells per  
1044 condition, in 3 independent experiments. Statistical analysis was performed using two-way  
1045 ANOVA with Tukey's test (see Table S1 for complete results): comparisons vs. control  
1046 samples are shown on the graph ( $p \leq 0.01 = **$ ,  $p \leq 0.0001 = ****$ ). **(D, E)** HeLaM cells were  
1047 depleted of both LICs then transfected with RNAi-resistant LIC1-mKate or LIC2-mKate **(D)** or  
1048 GFP-LIC1-FL, GFP-LIC1-CT2, GFP-LIC1-CT3 and GFP constructs **(E)**. GM130 labelling was used  
1049 to reveal Golgi apparatus morphology (wide-field images: asterisks mark cells expressing the  
1050 constructs). Golgi morphology was scored for ~100 cells per experimental condition in three  
1051 independent experiments **(E)**. All scale bars = 10  $\mu$ m.

1052

1053 **Figure 6. LICs 1 and 2 act redundantly in endocytic organelle positioning, with helix 1 being**  
1054 **essential.**

1055 **(A)** HeLaM cells were depleted of Lamin A/C or LIC 1 and 2 using 5 nM of each siRNA duplex  
1056 and stained for organelle markers (EEA1, early endosomes; LAMP1, lysosomes; Tfr,  
1057 recycling endosomes). **(B)** LIC-depleted cells were transfected with siRNA-resistant LIC1-  
1058 mKate or LIC2-GFP and antibody labelled. The boxed region in the LAMP1 image is shown at  
1059 two different focal planes. Asterisks mark transfected cells. **(C, D)** LIC depleted cells were  
1060 transfected with GFP-LIC1 FL, CT2, CT3 or GFP. Asterisks mark transfected cells. Control  
1061 knockdown cells were not transfected. Cells were labelled with anti-EEA1 **(C)** or anti-LAMP1  
1062 **(D)**. All images are wide-field. Scale bars = 10  $\mu$ m. Early endosome and lysosome position  
1063 phenotypes were scored as outlined in Fig. S3, with ~100 cells per condition, repeated in 3  
1064 independent experiments.

1065

1066

1067 **Figure 7. KASH5 has properties of a dynein adaptor.**

1068 **(A)** HeLaM cells transiently expressing GFP-KASH5 $\Delta$ K or GFP-KASH5 $\Delta$ N $\Delta$ K (which lacks the  
1069 dynein binding domain) were labelled with GM130 or LAMP1 antibodies (z-stack projections  
1070 of deconvolved images shown). Cells were scored for phenotypes associated with dynein  
1071 inhibition: Golgi apparatus scattering, peripheral clustering of lysosomes and enlarged  
1072 lysosomes. Manual scoring of 100 cells per condition was repeated in three independent  
1073 experiments, with mean and S.D. shown. An unpaired t-test was performed comparing GFP-  
1074 KASH5 $\Delta$ K- and GFP-KASH5 $\Delta$ N $\Delta$ K- expressing cells for each phenotype. \*\*\*\* =  $p \leq 0.0001$ , \*\*\*  
1075 =  $p \leq 0.001$ , \*\* =  $p \leq 0.01$ . **(B, C)** Full length HA-KASH5 **(B)** or HA-RILP **(C)** were expressed alone  
1076 (top panel, control) or with dominant negative GFP-BICD2N (middle panel), or dominant  
1077 negative GFP-Rab11-FIP3-I73E (bottom panel) in HeLaM cells. Endogenous dynein was  
1078 visualised along with HA-KASH5 or HA-RILP using antibodies to LIC1 and HA (wide-field  
1079 imaging, scale bar = 10  $\mu$ m). Thin black and white (left panels) or red lines (LIC1 panels)  
1080 show where line scan plots were performed (right).

1081

1082 **Figure 8. KASH5 is an activating adaptor for dynein motility in vitro.**

1083 **(A)** SDS-PAGE and Coomassie blue staining of purified bacterially-expressed KASH5<sub>1-406</sub>. **(B)**  
1084 SEC-MALS analysis of KASH5<sub>1-460</sub> demonstrating a molecular weight of 101 kDa (predicted  
1085 dimer molecular weight is 103 kDa). **(C)** Purified baculovirus-expressed recombinant dynein,  
1086 LIS1 and porcine brain dynactin were combined with and without KASH5<sub>1-460</sub> and motility of  
1087 individual 6-carboxytetramethylrhodamine-labelled dynein molecules was visualised using  
1088 TIRF microscopy. The activating adaptor Hook3<sub>1-522</sub> was used as a positive control. **(D)** The  
1089 number of processive events per  $\mu$ m microtubule per minute was determined from  
1090 kymographs in a blinded fashion for all three conditions in three technical replicates, with  
1091 the mean  $\pm$  S.D. plotted. The total number of movements analysed were 2066 for Hook3,  
1092 339 for KASH5 and 34 for the no addition control. Significance was determined using ANOVA  
1093 with Tukey's multiple comparison (ns = not significant, \* =  $p \leq 0.05$ , \*\*\*\* =  $p \leq 0.0001$ ). **(E)** The  
1094 mean velocity of processive dynein movements from the KASH5<sub>1-406</sub> and Hook3<sub>1-522</sub> data are  
1095 plotted ( $\pm$  S.D., n=3 replicates).

1096

1097 **Figure 9. KASH5's EF hand is critical for dynein and dynactin complex assembly.**

1098 **(A)** Top: Sequence comparison between human KASH5 and other dynein adaptors  
1099 containing EF-hands, and between KASH5 proteins from different species. The EF-hand  
1100 consensus sequence is shown, along with position nomenclature (Grabarek, 2006). Bottom:  
1101 mutations generated in KASH5 EF-hands (altered amino acids shown in red), along with  
1102 published mutations in the calcium-dependent dynein adaptor CRACR2a (Wang et al., 2019).  
1103 KASH5 mutant dynein-binding activity is indicated by + or - symbols. **(B-G)** GFP-tagged  
1104 KASH5 $\Delta$ K, GFP-KASH $\Delta$ K EF-hand mutants, or GFP were expressed in HeLaM cells. Cells were  
1105 then fixed and labelled with antibodies to GFP (shown in magenta), GM130 (yellow) and  
1106 LAMP1 (cyan) to test if the expressed protein disrupted endogenous dynein function.  
1107 Arrows in merged panels indicate peripheral clusters of lysosomes. Wide-field imaging; scale  
1108 bar = 10  $\mu$ m. **(H)** GFP-trap immunoprecipitates from cells expressing the GFP-hKASH5 $\Delta$ K EF  
1109 hand mutants, or GFP-hKASH5 $\Delta$ K probed with antibodies to GFP, dynein IC and dynactin  
1110 p150.

1111

1112 **Supplementary Figure 1. Effect of IC2 and LIS1 depletion on dynein and dynactin**  
1113 **recruitment to KASH5.**

1114 **(A)** Illustration depicting how the meiotic LINC complex connects telomeres inside the  
1115 nucleus to cytoplasmic dynein in the cytoplasm. Dynein movement begins to drag the  
1116 telomeres towards the centrosome (yellow dots) in leptotene of prophase I, leading to the  
1117 formation of the chromosome 'bouquet' in zygotene. This movement allows pairing of  
1118 homologous chromosomes and the formation of the synaptonemal complex. INM, inner  
1119 nuclear membrane; ONM, outer nuclear membrane. **(B)** HeLa cells stably expressing GFP-  
1120 KASH5 (green) were depleted of IC2 using 20 nM siRNA for 72 hours and then processed for  
1121 immunofluorescence with antibodies against LIC1, dynactin p150 and LIS1. Cells were  
1122 scored in a binary fashion for recruitment IC, LIC1 or p150 to KASH5. The mean and standard  
1123 deviation is shown for three independent repeats in which 300 cells were scored for each  
1124 condition. **(C-F)** HeLa cells stably expressing inducible GFP-KASH5 were depleted of LIS1  
1125 using 20 nM siRNA, induced to express GFP-KASH5 and then fixed and labelled. **(C)** Cells  
1126 were scored in a binary fashion to determine if cells showed recruitment IC, LIC1 or p150 to  
1127 KASH5. The mean and standard deviation is shown for four independent repeats in which  
1128 300 cells were scored for each condition. Statistical tests were determined as not being  
1129 appropriate for the data in B or C, as there is no variation in some control conditions.

1130 Immunofluorescence images showing GFP-KASH5 in green and antibodies against dynein  
1131 LIC1 **(D)**, IC **(E)** and dynactin p150 **(F)** in magenta. Images were taken on a DeltaVision  
1132 microscope followed by deconvolution. Images are Z-stack projections. Thin white lines on  
1133 colour images are site of line scans which are shown on the right. Scale bar represents 10  
1134  $\mu\text{m}$ .

1135

1136 **Supplementary Figure 2. Immunoblot analysis demonstrating depletion of targets by**  
1137 **RNAi.**

1138 **(A)** HeLa cells stably expressing inducible GFP-KASH5 were depleted of various dynein  
1139 subunits or LIS1 using 20 nM siRNAs against the following targets: Control (Sc), LIC1, LIC2,  
1140 LIC1&2, IC2 and LIS1. Representative western blots of cell lysates of knockdown cells are  
1141 shown. Blots were probed with antibodies against GFP, p150, IC, LIC1, LIC2, LIS1 and  $\alpha$ -  
1142 tubulin followed by fluorescently-labelled secondary antibodies. Molecular weight markers  
1143 are shown on the right of the blots. The efficiency of knockdowns was analysed by  
1144 quantification of blots using Image Studio software, with correction for protein loading  
1145 using the anti-tubulin signal. Experiments were repeated four times alongside  
1146 immunofluorescence experiments. Error bars represent standard deviations. **(B)**  
1147 Immunoblotting of HeLaM cells depleted with 5 nM each of LIC1 and LIC2 duplexes, or 20  
1148 nM control duplexes, for 72 hours. Blots were probed with antibodies to dynein LIC1, LIC2,  
1149 IC (IC74) and dynactin p150.

1150

1151 **Supplementary Figure 3. Depiction of Golgi apparatus, early endosome, and lysosome**  
1152 **phenotype categories.**

1153 HeLaM cells were treated with 5 nM LIC1 plus 5 nM LIC2 for 72 hours in total. Cells were  
1154 fixed after 72 hours and processed for immunofluorescence with antibodies to GM130  
1155 (Golgi apparatus), EEA1 (early endosomes) or LAMP1 (lysosomes) and example images of  
1156 each phenotype collected. A schematic drawing of each category is shown, with  
1157 representative cells for that category indicated by asterisks in the immunofluorescence  
1158 panel.

1159

1160 **Supplementary Figure 4. LICs act redundantly to recruit dynein and dynactin to RILP-**  
1161 **positive late endosomes, and recruitment requires helix 1.**

1162 **(A-D)** Cells were depleted of LICs individually or together for 48 hours using a total of 20 nM  
1163 siRNA then transfected with GFP-RILP and fixed 1 day later and labelled for IC **(A)** or  
1164 dynactin p150 **(B)**. Control cells (not siRNA treated) were transfected with GFP-RILP.  
1165 DeltaVision deconvolved images are shown as z-stack projections. Scale bar = 10  $\mu$ m. The  
1166 percentage of cells with GFP-RILP structures labelled with IC **(C)** or p150 **(D)** was scored ( $\pm$   
1167 S.D.). At least 100 cells were scored in each of three independent experiments. \*\*\* =  
1168  $P < 0.001$ , \*\*\*\* =  $P < 0.0001$ , one-way ANOVA with Dunnett's post-hoc test. **(E)** HeLaM cells  
1169 were co-transfected with HA-RILP and GFP-LIC1 full length, CT2 or CT3. Wide-field images  
1170 are shown; scale bar = 10  $\mu$ m.

1171

1172 **Supplementary Figure 5. The dominant negative overexpression of KASH5 or BICD2N does**  
1173 **not cause a major mitotic spindle assembly defect.**

1174 HeLaM cells were transfected with **(A)** GFP-KASH5 $\Delta$ N $\Delta$ K, **(B)** GFP-KASH5 $\Delta$ K, **(C)** GFP-BICD2-N  
1175 or **(D)** mcherry-P50. They were fixed using a protocol to maintain mitotic cells on the  
1176 coverslips (fix-perm: see methods) and then labelled with antibodies against  $\alpha$ -tubulin and  
1177 pericentrin. Images were taken on a DeltaVision microscope followed by deconvolution. Z-  
1178 stack projections are shown. Scale bar is 10  $\mu$ m. **(E)** Mitotic HeLaM cells that were  
1179 untransfected or transiently expressing the indicated construct were scored depending on  
1180 whether the spindle was bipolar or disrupted. The experiment was repeated three times  
1181 and 100 cells scored in each condition, and the mean and S.D. are shown. \* =  $p \leq 0.05$ , \*\*\* =  
1182  $p \leq 0.001$ , one-way ANOVA with Dunnett's post-hoc test.

1183

1184 **Supplementary Figure 6. Effect of BAPTA-AM treatment on dynein recruitment to KASH5**  
1185 **and Rab11-FIP3.**

1186 Following transient transfection of HeLa M cells with GFP-KASH5-FL **(A)** or Vero cells with  
1187 GFP-Rab11-FIP3 **(B)**, cells were treated with either DMSO vehicle control or 10  $\mu$ M BAPTA-  
1188 AM for 2 hours at 37°C. Cells were fixed and labelled with antibodies to endogenous LIC1  
1189 and epitope tags. Wide-field images, with boxed regions shown as enlargements in **(B)**.  
1190 Scale bar represents 10  $\mu$ m.

1191

1192 **Table S1. Statistical analysis of the effects of LIC1 and LIC2 depletion on Golgi apparatus**  
1193 **morphology.**

1194 The data presented graphically in Figure 5C were analysed by Two-way ANOVA with Tukey's  
1195 test. P values: \*\*  $\leq 0.01$ , \*\*\*\*  $\leq 0.0001$ . Analysis of 100 cells per condition, in each of 3  
1196 independent experiments.



1197 **References**

- 1198 Addinall, S., P. Mayr, S. Doyle, J. Sheehan, P. Woodman, and V. Allan. 2001. Phosphorylation  
1199 by cdc2-cyclinB1 kinase releases cytoplasmic dynein from membranes. *J. Biol. Chem.*  
1200 276:15939-15944.
- 1201 Agrawal, R., J.P. Gillies, J. Zang, J. Zhang, S. Garrott, H. Shibuya, J. Nandakumar, and M.E.  
1202 DeSantis. 2022. The KASH5 protein involved in meiotic chromosomal movements is a  
1203 novel dynein activating adaptor. *bioRxiv*. doi.org/10.1101/2022.03.11.483947:Posted  
1204 March 12, 2022.
- 1205 Apolonia, L., R. Schulz, T. Curk, P. Rocha, C.M. Swanson, T. Schaller, J. Ule, and M.H. Malim.  
1206 2015. Promiscuous RNA binding ensures effective encapsidation of APOBEC3 proteins  
1207 by HIV-1. *PLoS Pathog.* 11:e1004609.
- 1208 Baffet, A.D., D.J. Hu, and R.B. Vallee. 2015. Cdk1 Activates Pre-mitotic Nuclear Envelope  
1209 Dynein Recruitment and Apical Nuclear Migration in Neural Stem Cells. *Dev Cell.*  
1210 33:703-716.
- 1211 Baumbach, J., A. Murthy, M.A. McClintock, C.I. Dix, R. Zalyte, H.T. Hoang, and S.L. Bullock.  
1212 2017. Lissencephaly-1 is a context-dependent regulator of the human dynein complex.  
1213 *Elife.* 6.
- 1214 Belyy, V., M.A. Schlager, H. Foster, A.E. Reimer, A.P. Carter, and A. Yildiz. 2016. The  
1215 mammalian dynein-dynactin complex is a strong opponent to kinesin in a tug-of-war  
1216 competition. *Nat Cell Biol.* 18:1018-1024.
- 1217 Bentebbal, S.A., B.R. Meqbel, A. Salter, V. Allan, B. Burke, and H.F. Horn. 2021. A human  
1218 infertility-associated KASH5 variant promotes mitochondrial localization. *Sci Rep.*  
1219 11:10133.
- 1220 Bielli, A., P.-O. Thörnqvist, A. Hendrick, R. Finn, K. Fitzgerald, and M. McCaffrey. 2001. The  
1221 small GTPase Rab4A interacts with the central region of cytoplasmic dynein light  
1222 intermediate chain-1. *Biochem. Biophys. Res. Comm.* 281:1141-1153.
- 1223 Bone, C.R., and D.A. Starr. 2016. Nuclear migration events throughout development. *J Cell Sci.*  
1224 129:1951-1961.
- 1225 Burke, B. 2018. LINC complexes as regulators of meiosis. *Curr Opin Cell Biol.* 52:22-29.
- 1226 Canty, J.T., and A. Yildiz. 2020. Activation and Regulation of Cytoplasmic Dynein. *Trends*  
1227 *Biochem Sci.* 45:440-453.

- 1228 Celestino, R., M.A. Henen, J.B. Gama, C. Carvalho, M. McCabe, D.J. Barbosa, A. Born, P.J.  
1229 Nichols, A.X. Carvalho, R. Gassmann, and B. Vogeli. 2019. A transient helix in the  
1230 disordered region of dynein light intermediate chain links the motor to structurally  
1231 diverse adaptors for cargo transport. *PLoS Biol.* 17:e3000100.
- 1232 Chapman, D.E., B.J.N. Reddy, B. Huy, M.J. Bovyn, S.J.S. Cruz, Z.M. Al-Shammari, H. Han, W.  
1233 Wang, D.S. Smith, and S.P. Gross. 2019. Regulation of in vivo dynein force production  
1234 by CDK5 and 14-3-3epsilon and KIAA0528. *Nat Commun.* 10:228.
- 1235 Chikashige, Y., C. Tsutsumi, M. Yamane, K. Okamasa, T. Haraguchi, and Y. Hiraoka. 2006.  
1236 Meiotic proteins bqt1 and bqt2 tether telomeres to form the bouquet arrangement  
1237 of chromosomes. *Cell.* 125:59-69.
- 1238 Chowdhury, S., S.A. Ketcham, T.A. Schroer, and G.C. Lander. 2015. Structural organization of  
1239 the dynein-dynactin complex bound to microtubules. *Nat. Struct. Mol. Biol.* 22:345-  
1240 347.
- 1241 Christensen, J.R., A.A. Kendrick, J.B. Truong, A. Aguilar-Maldonado, V. Adani, M.  
1242 Dzieciatkowska, and S.L. Reck-Peterson. 2021. Cytoplasmic dynein-1 cargo diversity is  
1243 mediated by the combinatorial assembly of FTS-Hook-FHIP complexes. *Elife.* 10.
- 1244 Cockell, M.M., K. Baumer, and P. Gonczy. 2004. *lis-1* is required for dynein-dependent cell  
1245 division processes in *C. elegans* embryos. *J Cell Sci.* 117:4571-4582.
- 1246 Collins, L.L., G. Simon, J. Matheson, C. Wu, M.C. Miller, T. Otani, X. Yu, S. Hayashi, R. Prekeris,  
1247 and G.W. Gould. 2012. Rab11-FIP3 is a cell cycle-regulated phosphoprotein. *BMC Cell*  
1248 *Biol.* 13:4.
- 1249 Colucci, A.M., M.C. Campana, M. Bellopede, and C. Bucci. 2005. The Rab-interacting lysosomal  
1250 protein, a Rab7 and Rab34 effector, is capable of self-interaction. *Biochemical and*  
1251 *biophysical research communications.* 334:128-133.
- 1252 Dekens, M.P.S., F.J. Pelegri, H.-M. Maischein, and C. Nüsslein-Volhard. 2003. The maternal-  
1253 effect gene *futile cycle* is essential for pronuclear congression and mitotic spindle  
1254 assembly in the zebrafish zygote. *Development.* 130:3907-3916.
- 1255 Dephoure, N., C. Zhou, J. Villen, S.A. Beausoleil, C.E. Bakalarski, S.J. Elledge, and S.P. Gygi.  
1256 2008. A quantitative atlas of mitotic phosphorylation. *Proc Natl Acad Sci U S A.*  
1257 105:10762-10767.
- 1258 Ding, X., R. Xu, J. Yu, T. Xu, Y. Zhuang, and M. Han. 2007. SUN1 is required for telomere  
1259 attachment to nuclear envelope and gametogenesis in mice. *Dev Cell.* 12:863-872.

- 1260 Dix, C., H. Soundararajan, N. Dzhindzhev, F. Begum, B. Suter, H. Ohkura, E. Stephens, and S.  
1261 Bullock. 2013. Lissencephaly-1 promotes the recruitment of dynein and dynactin to  
1262 transported mRNAs. *J. Cell Biol.* 202:479-494.
- 1263 Driskell, O., A. Mironov, V. Allan, and P. Woodman. 2007. Dynein is required for receptor  
1264 sorting and the morphogenesis of early endosomes. *Nat Cell Biol.* 9:113-120.
- 1265 Dunce, J.M., A.E. Milburn, M. Gurusaran, I. da Cruz, L.T. Sen, R. Benavente, and O.R. Davies.  
1266 2018. Structural basis of meiotic telomere attachment to the nuclear envelope by  
1267 MAJIN-TERB2-TERB1. *Nat Commun.* 9:5355.
- 1268 Dwivedi, D., A. Kumari, S. Rathi, S.V.S. Mylavarapu, and M. Sharma. 2019. The dynein adaptor  
1269 Hook2 plays essential roles in mitotic progression and cytokinesis. *J Cell Biol.* 218:871-  
1270 894.
- 1271 Dzhindzhev, N.S., S.L. Rogers, R.D. Vale, and H. Ohkura. 2005. Distinct mechanisms govern the  
1272 localisation of Drosophila CLIP-190 to unattached kinetochores and microtubule plus-  
1273 ends. *J Cell Sci.* 118:3781-3790.
- 1274 Elshenawy, M.M., J.T. Canty, L. Oster, L.S. Ferro, Z. Zhou, S.C. Blanchard, and A. Yildiz. 2019.  
1275 Cargo adaptors regulate stepping and force generation of mammalian dynein-  
1276 dynactin. *Nat Chem Biol.* 15:1093-1101.
- 1277 Elshenawy, M.M., E. Kusakci, S. Volz, J. Baumbach, S.L. Bullock, and A. Yildiz. 2020. Lis1  
1278 activates dynein motility by modulating its pairing with dynactin. *Nat Cell Biol.* 22:570-  
1279 578.
- 1280 Even, I., S. Reidenbach, T. Schlechter, N. Berns, R. Herold, W. Roth, D. Kronic, V. Riechmann,  
1281 and I. Hofmann. 2019. DLIC1, but not DLIC2, is upregulated in colon cancer and this  
1282 contributes to proliferative overgrowth and migratory characteristics of cancer cells.  
1283 *FEBS J.* 286:803-820.
- 1284 Feng, Q., A.M. Gicking, and W.O. Hancock. 2020. Dynactin p150 promotes processive motility  
1285 of DDB complexes by minimizing diffusional behavior of dynein. *Mol Biol Cell.* 31:782-  
1286 792.
- 1287 Fenton, A.R., T.A. Jongens, and E.L.F. Holzbaur. 2021. Mitochondrial adaptor TRAK2 activates  
1288 and functionally links opposing kinesin and dynein motors. *Nat Commun.* 12:4578.
- 1289 Flores-Rodriguez, N., S. Rogers, D. Kenwright, T. Waigh, P. Woodman, and V. Allan. 2011.  
1290 Roles of dynein and dynactin in early endosome dynamics revealed using automated  
1291 tracking and global analysis. *PLoS ONE.* 6:e24479.

- 1292 Gama, J.B., C. Pereira, P.A. Simoes, R. Celestino, R.M. Reis, D.J. Barbosa, H.R. Pires, C.  
1293 Carvalho, J. Amorim, A.X. Carvalho, D.K. Cheerambathur, and R. Gassmann. 2017.  
1294 Molecular mechanism of dynein recruitment to kinetochores by the Rod-Zw10-Zwilch  
1295 complex and Spindly. *J Cell Biol.* 216:943-960.
- 1296 Gill, S.R., T.A. Schroer, I. Szilak, E.R. Steuer, and M.P. Sheetz. 1991. Dynactin, a conserved,  
1297 ubiquitously expressed component of an activator of vesicle motility mediated by  
1298 cytoplasmic dynein. *J. Cell Biol.* 115:1639-1650.
- 1299 Gillies, J.P., J.M. Reimer, E.P. Karasmanis, I. Lahiri, Z.M. Htet, A.E. Leschziner, and S.L. Reck-  
1300 Peterson. 2022. Structural Basis for Cytoplasmic Dynein-1 Regulation by Lis1. *eLife*. *In*  
1301 *press*:In press.
- 1302 Goncalves, J.C., T.J. Dantas, and R.B. Vallee. 2019. Distinct roles for dynein light intermediate  
1303 chains in neurogenesis, migration, and terminal somal translocation. *J Cell Biol.*  
1304 218:808-819.
- 1305 Gönczy, P., S. Pichler, M. Kirkham, and A. Hyman. 1999. Cytoplasmic dynein is required for  
1306 distinct aspects of MTOC positioning, including centrosome separation, in the one cell  
1307 stage *Caenorhabditis elegans* embryo. *J. Cell Biol.* 147:135-150.
- 1308 Grabarek, Z. 2006. Structural basis for diversity of the EF-hand calcium-binding proteins. *J Mol*  
1309 *Biol.* 359:509-525.
- 1310 Granger, E., G. McNee, V. Allan, and P. Woodman. 2014. The role of the cytoskeleton and  
1311 molecular motors in endosomal dynamics. *Semin Cell Dev Biol.* 31:20-29.
- 1312 Grotjahn, D.A., S. Chowdhury, Y. Xu, R.J. McKenney, T.A. Schroer, and G.C. Lander. 2018. Cryo-  
1313 electron tomography reveals that dynactin recruits a team of dyneins for processive  
1314 motility. *Nat Struct Mol Biol.* 25:203-207.
- 1315 Guo, X., G.G. Farias, R. Mattera, and J.S. Bonifacino. 2016. Rab5 and its effector FHF contribute  
1316 to neuronal polarity through dynein-dependent retrieval of somatodendritic proteins  
1317 from the axon. *Proc Natl Acad Sci U S A.* 113:E5318-5327.
- 1318 Gutierrez, P.A., B.E. Ackermann, M. Vershinin, and R.J. McKenney. 2017. Differential effects  
1319 of the dynein-regulatory factor Lissencephaly-1 on processive dynein-dynactin  
1320 motility. *J Biol Chem.* 292:12245-12255.
- 1321 Hamer, G., H. Wang, E. Bolcun-Filas, H.J. Cooke, R. Benavente, and C. Hoog. 2008. Progression  
1322 of meiotic recombination requires structural maturation of the central element of the  
1323 synaptonemal complex. *J Cell Sci.* 121:2445-2451.

- 1324 Hirotsune, S., M. Fleck, M. Gambello, G. Bix, A. Chen, G. Clark, D. Ledbetter, C. McBain, and  
1325 A. Wynshaw-Boris. 1998. Graded reduction of Pafah1b1 (Lis1) activity results in  
1326 neuronal migration defects and early embryonic lethality. *Nat. Genet.* 19:333-339.
- 1327 Hoogenraad, C., A. Akhmanova, S. Howell, B. Dortland, C. de Zeeuw, R. Willemsen, P. Visser,  
1328 F. Grosveld, and N. Galjart. 2001. Mammalian Golgi-associated Bicaudal-D2 functions  
1329 in the dynein-dynactin pathway by interacting with these complexes. *EMBO J.*  
1330 20:4041-4054.
- 1331 Hoogenraad, C., P. Wulf, N. Schiefermeier, T. Stepanova, N. Galjart, J. Small, F. Grosveld, C. de  
1332 Zeeuw, and A. Akhmanova. 2003. Bicaudal D induces selective dynein-mediated  
1333 microtubule minus end-directed transport. *EMBO J.* 22:6004-6015.
- 1334 Horgan, C.P., S.R. Hanscom, R.S. Jolly, C.E. Futter, and M.W. McCaffrey. 2010a. Rab11-FIP3  
1335 binds dynein light intermediate chain 2 and its overexpression fragments the Golgi  
1336 complex. *Biochemical and biophysical research communications.* 394:387-392.
- 1337 Horgan, C.P., S.R. Hanscom, R.S. Jolly, C.E. Futter, and M.W. McCaffrey. 2010b. Rab11-FIP3  
1338 links the Rab11 GTPase and cytoplasmic dynein to mediate transport to the  
1339 endosomal-recycling compartment. *J Cell Sci.* 123:181-191.
- 1340 Horgan, C.P., S.R. Hanscom, and M.W. McCaffrey. 2011. Dynein LIC1 localises to the mitotic  
1341 spindle and midbody and LIC2 localises to spindle poles during cell division. *Cell Biol.*  
1342 *Int.* doi:10.1042/CBI20100284.
- 1343 Horn, H., D.I. Kim, G. Wright, E. Wong, C. Stewart, B. Burke, and K. Roux. 2013. A mammalian  
1344 KASH domain protein coupling meiotic chromosomes to the cytoskeleton. *J. Cell Biol.*  
1345 202:1023-1039.
- 1346 Htet, Z.M., J.P. Gillies, R.W. Baker, A.E. Leschziner, M.E. DeSantis, and S.L. Reck-Peterson.  
1347 2020. LIS1 promotes the formation of activated cytoplasmic dynein-1 complexes. *Nat*  
1348 *Cell Biol.* 22:518-525.
- 1349 Hunt, S., A. Townley, C. Danson, P.J. Cullen, and D.J. Stephens. 2013. Microtubule motors  
1350 mediate endosomal sorting by maintaining functional domain organization. *J. Cell Sci.*  
1351 126:2493-2501.
- 1352 Jha, R., J. Roostalu, N.I. Cade, M. Trokter, and T. Surrey. 2017. Combinatorial regulation of the  
1353 balance between dynein microtubule end accumulation and initiation of directed  
1354 motility. *EMBO J.* 36:3387-3404.

- 1355 Johansson, M., N. Rocha, W. Zwart, I. Jordens, L. Janssen, C. Kuijl, V. Olkkonen, and J. Neefjes.  
1356 2007. Activation of endosomal dynein motors by stepwise assembly of Rab7-RILP-  
1357 p150Glued, ORP1L and the receptor bIII spectrin. *J. Cell Biol.* 176:459-471.
- 1358 Jones, L., C. Villemant, T. Starborg, A. Salter, G. Goddard, P. Ruane, P. Woodman, N.  
1359 Papalopulu, S. Woolner, and V. Allan. 2014. Dynein light intermediate chains maintain  
1360 spindle bipolarity by functioning in centriole cohesion. *J. Cell Biol.* 207:499-516.
- 1361 Jordens, I., M. Fernandez-Borja, M. Marsman, S. Dusseljee, L. Janssen, J. Calafat, H. Janssen,  
1362 R. Wubbolts, and J. Neefjes. 2001. The Rab7 effector protein RILP controls lysosomal  
1363 transport by inducing the recruitment of dynein-dynactin motors. *Curr. Biol.* 11:1680-  
1364 1685.
- 1365 Karki, S., and E.L.F. Holzbaur. 1995. Affinity chromatography demonstrates a direct binding  
1366 between cytoplasmic dynein and the dynactin complex. *J. Biol. Chem.* 270:28806-  
1367 28811.
- 1368 King, S., C. Brown, K. Maier, N. Quintyne, and T. Schroer. 2003. Analysis of the dynein-dynactin  
1369 interaction in vitro and in vivo. *Mol. Biol. Cell.* 14:5089-5097.
- 1370 Koszul, R., K.P. Kim, M. Prentiss, N. Kleckner, and S. Kameoka. 2008. Meiotic chromosomes  
1371 move by linkage to dynamic actin cables with transduction of force through the  
1372 nuclear envelope. *Cell.* 133:1188-1201.
- 1373 Kumari, A., C. Kumar, R. Pergu, M. Kumar, S.P. Mahale, N. Wasnik, and S.V.S. Mylavarapu.  
1374 2021a. Phosphorylation and Pin1 binding to the LIC1 subunit selectively regulate  
1375 mitotic dynein functions. *J Cell Biol.* 220.
- 1376 Kumari, A., C. Kumar, N. Wasnik, and S.V.S. Mylavarapu. 2021b. Dynein light intermediate  
1377 chains as pivotal determinants of dynein multifunctionality. *J Cell Sci.* 134.
- 1378 Lam, C., M.A. Vergnolle, L. Thorpe, P. Woodman, and V. Allan. 2010. Functional interplay  
1379 between LIS1, NDE1 and NDEL1 in dynein-dependent organelle positioning. *J Cell Sci.*  
1380 123:202-212.
- 1381 Lau, C.K., F.J. O'Reilly, B. Santhanam, S.E. Lacey, J. Rappsilber, and A.P. Carter. 2021. Cryo-EM  
1382 reveals the complex architecture of dynactin's shoulder region and pointed end.  
1383 *EMBO J.* 40:e106164.
- 1384 Lee, C.Y., H.F. Horn, C.L. Stewart, B. Burke, E. Bolcun-Filas, J.C. Schimenti, M.E. Dresser, and  
1385 R.J. Pezza. 2015. Mechanism and regulation of rapid telomere prophase movements  
1386 in mouse meiotic chromosomes. *Cell Rep.* 11:551-563.

- 1387 Lee, I.G., S.E. Cason, S.S. Alqassim, E.L.F. Holzbaur, and R. Dominguez. 2020. A tunable LIC1-  
1388 adaptor interaction modulates dynein activity in a cargo-specific manner. *Nat*  
1389 *Commun.* 11:5695.
- 1390 Lee, I.G., M.A. Olenick, M. Boczkowska, C. Franzini-Armstrong, E.L.F. Holzbaur, and R.  
1391 Dominguez. 2018. A conserved interaction of the dynein light intermediate chain with  
1392 dynein-dynactin effectors necessary for processivity. *Nat Commun.* 9:986.
- 1393 Lee, Y.L., and B. Burke. 2018. LINC complexes and nuclear positioning. *Semin Cell Dev Biol.*  
1394 82:67-76.
- 1395 Lindeman, R.E., and F. Pelegri. 2012. Localized Products of futile cycle/ Irmp Promote  
1396 Centrosome-Nucleus Attachment in the Zebrafish Zygote. *Current Biology.* 22:843-  
1397 851.
- 1398 Link, J., M. Leubner, J. Schmitt, E. Gob, R. Benavente, K.T. Jeang, R. Xu, and M. Alsheimer.  
1399 2014. Analysis of meiosis in SUN1 deficient mice reveals a distinct role of SUN2 in  
1400 mammalian meiotic LINC complex formation and function. *PLoS Genet.* 10:e1004099.
- 1401 Liu, H., T. Huang, M. Li, M. Li, C. Zhang, J. Jiang, X. Yu, Y. Yin, F. Zhang, G. Lu, M.C. Luo, L.R.  
1402 Zhang, J. Li, K. Liu, and Z.J. Chen. 2019. SCRE serves as a unique synaptonemal complex  
1403 fastener and is essential for progression of meiosis prophase I in mice. *Nucleic Acids*  
1404 *Res.* 47:5670-5683.
- 1405 Mahale, S., M. Kumar, A. Sharma, A. Babu, S. Ranjan, C. Sachidanandan, and S.V.S.  
1406 Mylavarapu. 2016a. The Light Intermediate Chain 2 Subpopulation of Dynein  
1407 Regulates Mitotic Spindle Orientation. *Sci Rep.* 6:22.
- 1408 Mahale, S.P., A. Sharma, and S.V. Mylavarapu. 2016b. Dynein Light Intermediate Chain 2  
1409 Facilitates the Metaphase to Anaphase Transition by Inactivating the Spindle  
1410 Assembly Checkpoint. *PLoS One.* 11:e0159646.
- 1411 Malone, C., L. Misner, N. Le Bot, M.-C. Tsai, J. Campbell, J. Ahringer, and J. White. 2003. The  
1412 *C. elegans* hook protein, ZYG12, mediates the essential attachment between the  
1413 centrosome and nucleus. *Cell.* 115:825-836.
- 1414 Markus, S.M., M.G. Marzo, and R.J. McKenney. 2020. New insights into the mechanism of  
1415 dynein motor regulation by lissencephaly-1. *Elife.* 9.
- 1416 Marzo, M.G., J.M. Griswold, and S.M. Markus. 2020. Pac1/LIS1 stabilizes an uninhibited  
1417 conformation of dynein to coordinate its localization and activity. *Nat Cell Biol.* 22:559-  
1418 569.

- 1419 McKenney, R., H. W, M. Tanenbaum, G. Bhabha, and R.D. Vale. 2014. Activation of  
1420 cytoplasmic dynein motility by dynactin-cargo adaptor complexes. *Science*. 345:337-  
1421 341.
- 1422 Minn, I.L., M.M. Rolls, W. Hanna-Rose, and C.J. Malone. 2009. SUN-1 and ZYG-12, Mediators  
1423 of Centrosome–Nucleus Attachment, Are a Functional SUN/KASH Pair in. *Molecular*  
1424 *biology of the cell*. 20:4586-4595.
- 1425 Morimoto, A., H. Shibuya, X. Zhu, J. Kim, K.i. Ishiguro, M. Han, and Y. Watanabe. 2012. A  
1426 conserved KASH domain protein associates with telomeres, SUN1, and dynactin  
1427 during mammalian meiosis. *J. Cell Biol.* 198:165-172.
- 1428 Niclas, J., V.J. Allan, and R.D. Vale. 1996. Cell cycle regulation of dynein association with  
1429 membranes modulates microtubule-based organelle transport. *J. Cell Biol.* 133:585-  
1430 593.
- 1431 Olenick, M.A., R. Dominguez, and E.L.F. Holzbaur. 2019. Dynein activator Hook1 is required  
1432 for trafficking of BDNF-signaling endosomes in neurons. *J Cell Biol.* 218:220-233.
- 1433 Olenick, M.A., and E.L.F. Holzbaur. 2019. Dynein activators and adaptors at a glance. *J Cell Sci.*  
1434 132.
- 1435 Olsen, J.V., M. Vermeulen, A. Santamaria, C. Kumar, M.L. Miller, L.J. Jensen, F. Gnad, J. Cox,  
1436 T.S. Jensen, E.A. Nigg, S. Brunak, and M. Mann. 2010. Quantitative  
1437 phosphoproteomics reveals widespread full phosphorylation site occupancy during  
1438 mitosis. *Sci Signal.* 3:ra3.
- 1439 Palmer, K.J., H. Hughes, and D.J. Stephens. 2009. Specificity of Cytoplasmic Dynein Subunits  
1440 in Discrete Membrane Trafficking Steps. *Mol Biol Cell.* 20:2885-2899.
- 1441 Pandey, J., and D. Smith. 2011. A Cdk5-dependent switch regulates Lis1/Ndel1/dynein-driven  
1442 organelle transport in adult neurons. *J. Neurosci.* 31:17207-17219.
- 1443 Payne, C., V. Rawe, J. Ramalho-Santos, C. Simerly, and G. Schatten. 2003. Preferentially  
1444 localized dynein and perinuclear dynactin associate with nuclear pore complex  
1445 proteins to mediate genomic union during mammalian fertilization. *J. Cell Sci.*  
1446 116:4727-4738.
- 1447 Peranen, J., M. Rikkonen, M. Hyvonen, and L. Kaariainen. 1996. T7 vectors with modified T7lac  
1448 promoter for expression of proteins in *Escherichia coli*. *Anal Biochem.* 236:371-373.



- 1449 Pfister, K., E. Fisher, I. Gibbons, T. Hays, E. Holzbaur, J. McIntosh, M. Porter, T. Schroer, K.  
1450 Vaughan, G. Witman, S. King, and R. Vallee. 2005. Cytoplasmic dynein nomenclature.  
1451 *J. Cell Biol.* 171:411-413.
- 1452 Qiu, R., J. Zhang, and X. Xiang. 2019. LIS1 regulates cargo-adaptor-mediated activation of  
1453 dynein by overcoming its autoinhibition in vivo. *J Cell Biol.* 218:3630-3646.
- 1454 Quinyne, N., S. Gill, D. Eckley, C. Crego, D. Compton, and T. Schroer. 1999. Dynactin is  
1455 required for microtubule anchoring at centrosomes. *J. Cell Biol.* 147:321-334.
- 1456 Raaijmakers, J., M. Tannenbaum, and R. Medema. 2013. Systematic dissection of dynein  
1457 regulators in mitosis. *J. Cell Biol.* 201:201-215.
- 1458 Reck-Peterson, S.L., W.B. Redwine, R.D. Vale, and A.P. Carter. 2018. The cytoplasmic dynein  
1459 transport machinery and its many cargoes. *Nat Rev Mol Cell Biol.* 19:382-398.
- 1460 Reddy, B.J., M. Mattson, C.L. Wynne, O. Vadpey, A. Durra, D. Chapman, R.B. Vallee, and S.P.  
1461 Gross. 2016. Load-induced enhancement of Dynein force production by LIS1-NudE in  
1462 vivo and in vitro. *Nat Commun.* 7:12259.
- 1463 Redwine, W.B., M.E. DeSantis, I. Hollyer, Z.M. Htet, P.T. Tran, S.K. Swanson, L. Florens, M.P.  
1464 Washburn, and S.L. Reck-Peterson. 2017. The human cytoplasmic dynein interactome  
1465 reveals novel activators of motility. *Elife.* 6.
- 1466 Reiner, O., R. Carrozzo, Y. Shen, M. Wehnert, F. Faustinella, W. Dobyns, T. Caskey, and D.  
1467 Ledbetter. 1993. Isolation of a Miller-Dieker lissencephaly gene containing a G protein  
1468 b-subunit-like repeat. *Nature.* 364:717-721.
- 1469 Reinsch, S., and E. Karsenti. 1997. Movement of nuclei along microtubules in *Xenopus* egg  
1470 extracts. *Curr. Biol.* 7:211-214.
- 1471 Robinson, J., E. Wojcik, M. Sanders, M. McGrail, and T.S. Hays. 1999. Cytoplasmic dynein is  
1472 required for the nuclear attachment and migration of centrosomes during mitosis in  
1473 *Drosophila*. *J Cell Biol.* 146:597-608.
- 1474 Rog, O., and A. Dernburg. 2015. Direct Visualization Reveals Kinetics of Meiotic Chromosome  
1475 Synapsis. *Cell Rep.* 10:1639-1645.
- 1476 Sato, A., B. Isaac, C.M. Phillips, R. Rillo, P.M. Carlton, D.J. Wynne, R.A. Kasad, and A.F.  
1477 Dernburg. 2009. Cytoskeletal Forces Span the Nuclear Envelope to Coordinate Meiotic  
1478 Chromosome Pairing and Synapsis. *Cell.* 139:907-919.
- 1479 Scherer, J., J. Yi, and R. Vallee. 2014. PKA-dependent dynein switching from lysosomes to  
1480 adenovirus: a novel form of host-virus competition. *J Cell Biol.* 205:163-177.

- 1481 Schlager, M.A., H. Hoang, L. Urnavicius, S. Bullock, and A.P. Carter. 2014a. In vitro  
1482 reconstitution of a highly processive recombinant human dynein complex. *Embo J.*  
1483 33:1855-1868.
- 1484 Schlager, M.A., A. Serra-Marques, I. Grigoriev, L.F. Gumy, M. Esteves da Silva, P.S. Wulf, A.  
1485 Akhmanova, and C.C. Hoogenraad. 2014b. Bicaudal d family adaptor proteins control  
1486 the velocity of Dynein-based movements. *Cell Rep.* 8:1248-1256.
- 1487 Schmitt, J., R. Benavente, D. Hodzic, C. Hoog, C.L. Stewart, and M. Alsheimer. 2007.  
1488 Transmembrane protein Sun2 is involved in tethering mammalian meiotic telomeres  
1489 to the nuclear envelope. *Proc Natl Acad Sci U S A.* 104:7426-7431.
- 1490 Schmoranzner, J., J.P. Fawcett, M. Segura, S. Tan, R.B. Vallee, T. Pawson, and G.G. Gundersen.  
1491 2009. Par3 and Dynein Associate to Regulate Local Microtubule Dynamics and  
1492 Centrosome Orientation during Migration. *Curr Biol.* 19:1065-1074.
- 1493 Schroeder, C., J. Olstrem, N. Hertz, and R. Vale. 2014. A Ras-like domain in the light  
1494 intermediate chain bridges the dynein motor to a cargo-binding region. *eLife.*  
1495 3:e03351-03322.
- 1496 Schroeder, C.M., and R.D. Vale. 2016. Assembly and activation of dynein–dynactin by the  
1497 cargo adaptor protein Hook3. *J Cell Biol.* 214:309-318.
- 1498 Schroer, T.A., and M.P. Sheetz. 1991. Two activators of microtubule-based vesicle transport.  
1499 *J. Cell Biol.* 115:1309-1318.
- 1500 Sharma, A., S. Dagar, and S.V.S. Mylavarapu. 2020. Transgelin-2 and phosphoregulation of the  
1501 LIC2 subunit of dynein govern mitotic spindle orientation. *J Cell Sci.* 133.
- 1502 Shibuya, H., K. Ishiguro, and Y. Watanabe. 2014. The TRF1-binding protein TERB1 promotes  
1503 chromosome movement and telomere rigidity in meiosis. *Nat Cell Biol.* 16:145-156.
- 1504 Siller, K.H., M. Serr, R. Steward, T.S. Hays, and C.Q. Doe. 2005. Live imaging of *Drosophila* brain  
1505 neuroblasts reveals a role for Lis1/dynactin in spindle assembly and mitotic checkpoint  
1506 control. *Mol Biol Cell.* 16:5127-5140.
- 1507 Sitaram, P., M. Anderson, J. Jodoin, E. Lee, and L. Lee. 2012. Regulation of dynein localization  
1508 and centrosome positioning by Lis-1 and asunder during *Drosophila* spermatogenesis.  
1509 *Development.* 39:2945-2954.
- 1510 Sivaram, M.V., T.L. Wadzinski, S.D. Redick, T. Manna, and S.J. Doxsey. 2009. Dynein light  
1511 intermediate chain 1 is required for progress through the spindle assembly  
1512 checkpoint. *Embo J.* 28:902-914.

- 1513 Sladewski, T.E., N. Billington, M.Y. Ali, C.S. Bookwalter, H. Lu, E.B. Kremontsova, T.A. Schroer,  
1514 and K.M. Trybus. 2018. Recruitment of two dyneins to an mRNA-dependent Bicaudal  
1515 D transport complex. *Elife*. 7.
- 1516 Spindler, M.C., J. Redolfi, F. Helmpobst, P. Kollmannsberger, C. Stigloher, and R. Benavente.  
1517 2019. Electron tomography of mouse LINC complexes at meiotic telomere attachment  
1518 sites with and without microtubules. *Commun Biol*. 2:376.
- 1519 Splinter, D., D. Razafsky, M.A. Schlager, A. Serra-Marques, I. Grigoriev, J. Demmers, N. Keijzer,  
1520 K. Jiang, I. Poser, A. Hyman, C.C. Hoogenraad, S. King, and A. Akhmanova. 2012. BICD2,  
1521 dynactin and LIS1 cooperate in regulating dynein recruitment to cellular structures.  
1522 *Mol. Biol. Cell*. 23:4226-4241.
- 1523 Srikanth, S., K.D. Kim, Y. Gao, J.S. Woo, S. Ghosh, G. Calmettes, A. Paz, J. Abramson, M. Jiang,  
1524 and Y. Gwack. 2016. A large Rab GTPase encoded by CRACR2A is a component of  
1525 subsynaptic vesicles that transmit T cell activation signals. *Sci Signal*. 9:ra31.
- 1526 Starr, D.A. 2011. KASH and SUN proteins. *Curr Biol*. 21:R414-415.
- 1527 Starr, D.A., and M. Han. 2002. Role of ANC-1 in tethering nuclei to the actin cytoskeleton.  
1528 *Science*. 298:406-409.
- 1529 Tan, S., J. Scherer, and R. Vallee. 2011. Recruitment of dynein to late endosomes and  
1530 lysosomes through light intermediate chains. *Mol Biol Cell*. 22:467-477.
- 1531 Torisawa, T., M. Ichikawa, A. Furuta, K. Saito, K. Oiwa, H. Kojima, Y.Y. Toyoshima, and K.a.y.  
1532 Furuta. 2014. Autoinhibition and cooperative activation mechanisms of cytoplasmic  
1533 dynein. *Nature cell biology*. 16:1118-1124.
- 1534 Trelles-Sticken, E., C. Adelfalk, J. Loidl, and H. Scherthan. 2005. Meiotic telomere clustering  
1535 requires actin for its formation and cohesin for its resolution. *J Cell Biol*. 170:213-223.
- 1536 Tsai, J.W., Y. Chen, A.R. Kriegstein, and R.B. Vallee. 2005. LIS1 RNA interference blocks neural  
1537 stem cell division, morphogenesis, and motility at multiple stages. *J Cell Biol*. 170:935-  
1538 945.
- 1539 Tynan, S.H., M.A. Gee, and R.B. Vallee. 2000a. Distinct but overlapping sites within the  
1540 cytoplasmic dynein heavy chain for dimerization and for intermediate chain and light  
1541 intermediate chain binding. *J Biol Chem*. 275:32769-32774.
- 1542 Tynan, S.H., A. Purohit, S.J. Doxsey, and R.B. Vallee. 2000b. Light intermediate chain 1 defines  
1543 a functional subfraction of cytoplasmic dynein which binds to pericentrin. *J. Biol.*  
1544 *Chem*. 275:32763-32768.

- 1545 Urnavicius, L., C.K. Lau, M.M. Elshenawy, E. Morales-Rios, C. Motz, A. Yildiz, and A.P. Carter.  
1546 2018. Cryo-EM shows how dynactin recruits two dyneins for faster movement.  
1547 *Nature*. 554:202-206.
- 1548 Urnavicius, L., K. Zhang, A.G. Diamant, C. Motz, M.A. Schlager, M. Yu, N.A. Patel, C.V.  
1549 Robinson, and A.P. Carter. 2015. The structure of the dynactin complex and its  
1550 interaction with dynein. *Science*. 347:2630-2630.
- 1551 Vaughan, K.T., and R.B. Vallee. 1995. Cytoplasmic dynein binds dynactin through a direct  
1552 interaction between the intermediate chains and p150Glued. *J. Cell Biol.* 131:1507-  
1553 1516.
- 1554 Villari, G., C. Enrico Bena, M. Del Giudice, N. Gioelli, C. Sandri, C. Camillo, A. Fiorio Pla, C. Bosia,  
1555 and G. Serini. 2020. Distinct retrograde microtubule motor sets drive early and late  
1556 endosome transport. *EMBO J.* 39:e103661.
- 1557 Wang, S., S.A. Ketcham, A. Schon, B. Goodman, Y. Wang, J. Yates, 3rd, E. Freire, T.A. Schroer,  
1558 and Y. Zheng. 2013. Nudel/NudE and Lis1 promote dynein and dynactin interaction in  
1559 the context of spindle morphogenesis. *Mol Biol Cell.* 24:3522-3533.
- 1560 Wang, Y., W. Huynh, T.D. Skokan, W. Lu, A. Weiss, and R.D. Vale. 2019. CRACR2a is a calcium-  
1561 activated dynein adaptor protein that regulates endocytic traffic. *J Cell Biol.* 218:1619-  
1562 1633.
- 1563 Wilson, G.M., A.B. Fielding, G.C. Simon, X. Yu, P.D. Andrews, R.S. Hames, A.M. Frey, A.A.  
1564 Peden, G.W. Gould, and R. Prekeris. 2005. The FIP3-Rab11 protein complex regulates  
1565 recycling endosome targeting to the cleavage furrow during late cytokinesis. *Mol Biol*  
1566 *Cell.* 16:849-860.
- 1567 Wortzel, I., G. Maik-Rachline, S.S. Yadav, T. Hanoch, and R. Seger. 2021. Mitotic HOOK3  
1568 phosphorylation by ERK1c drives microtubule-dependent Golgi destabilization and  
1569 fragmentation. *iScience.* 24:102670.
- 1570 Wozniak, M., B. Bola, K. Brownhill, Y.-C. Yang, V. Levakova, and V. Allan. 2009. Role of kinesin-  
1571 1 and cytoplasmic dynein in endoplasmic reticulum movement in VERO cells. . *J. Cell*  
1572 *Sci.* 122:1979-1989.
- 1573 Wynne, D., O. Rog, P. Carlton, and A.F. Dernburg. 2012. Dynein-dependent processive  
1574 chromosome motions promote homologous pairing in *C. elegans* meiosis. *J. Cell Biol.*  
1575 196:47-64.

- 1576 Yi, J., K. Ori-McKenney, R. McKenny, M. Vershinin, S. Gross, and R. Vallee. 2011. High-  
1577 resolution imaging reveals indirect coordination of opposite motors and a role for LIS1  
1578 in high-load axonal transport. *J. Cell Bio.* 195:193-201.
- 1579 Zhang, K., H.E. Foster, A. Rondelet, S.E. Lacey, N. Bahi-Buisson, A.W. Bird, and A.P. Carter.  
1580 2017. Cryo-EM Reveals How Human Cytoplasmic Dynein Is Auto-inhibited and  
1581 Activated. *Cell.* 169:1303-1314 e1318.
- 1582 Zhang, Q., S.Y. Ji, K. Busayavalasa, J. Shao, and C. Yu. 2019. Meiosis I progression in  
1583 spermatogenesis requires a type of testis-specific 20S core proteasome. *Nat Commun.*  
1584 10:3387.
- 1585 Zufferey, R., D. Nagy, R.J. Mandel, L. Naldini, and D. Trono. 1997. Multiply attenuated lentiviral  
1586 vector achieves efficient gene delivery in vivo. *Nat Biotechnol.* 15:871-875.  
1587

## Garner et al. Figure 1

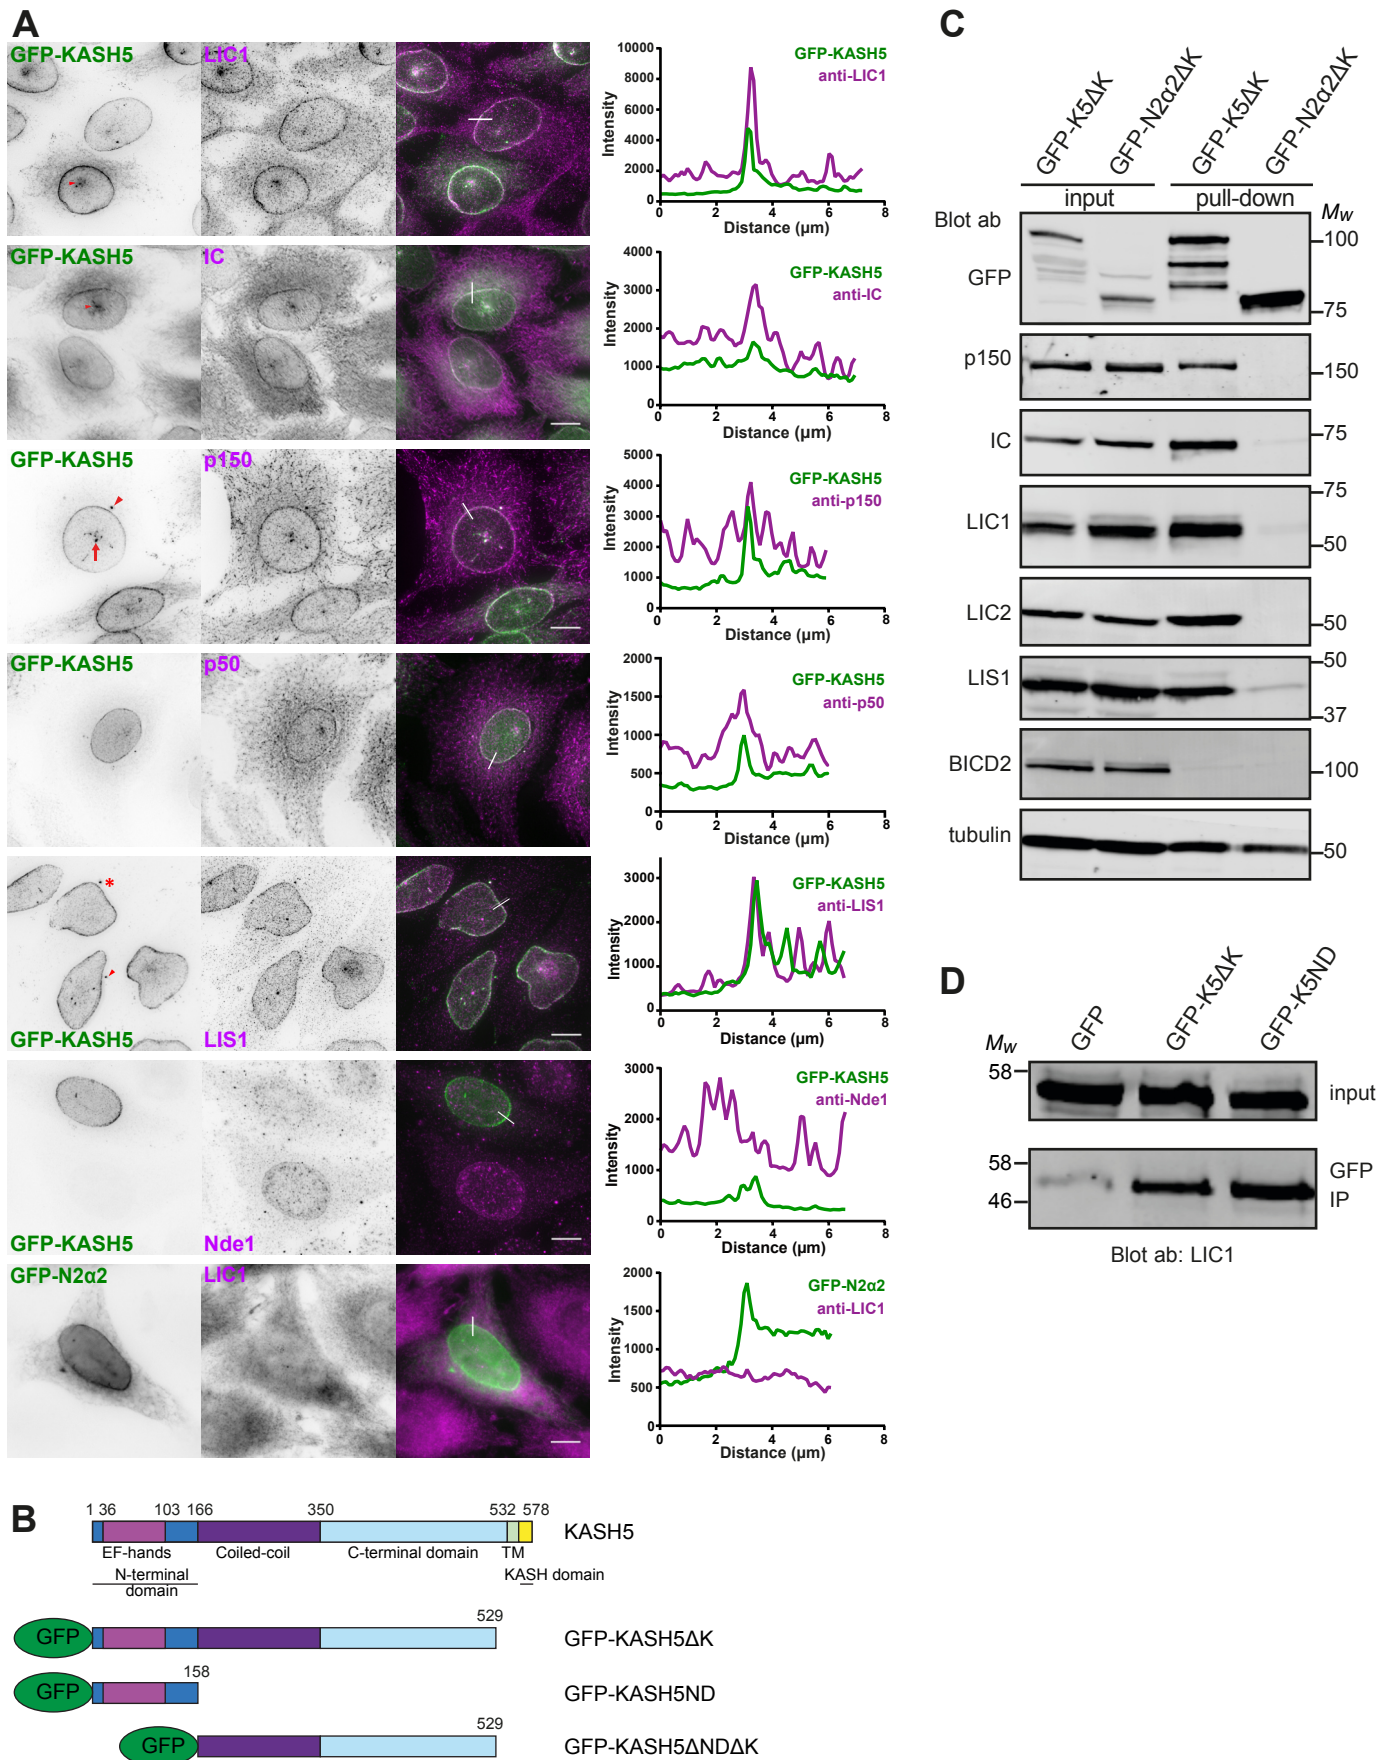

## Garner et al. Figure 2

### A IC2 siRNA

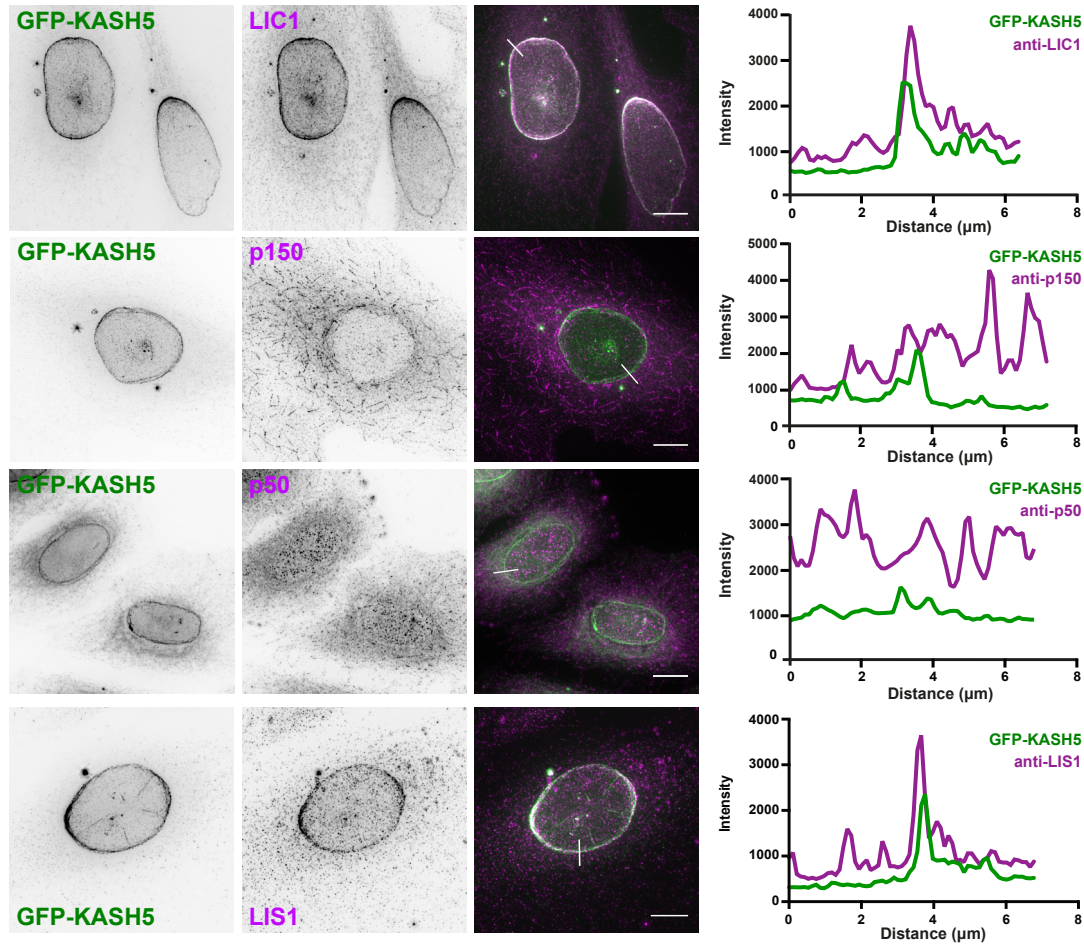

### B RFP-p150-CC1 expression

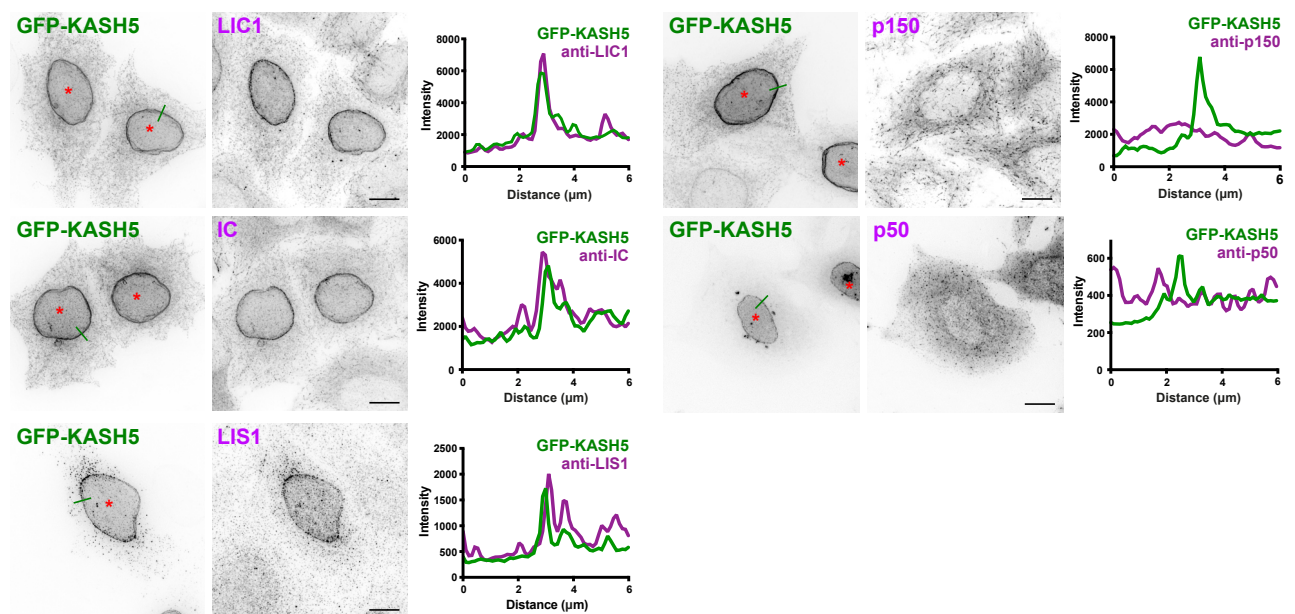

### Garner et al. Figure 3

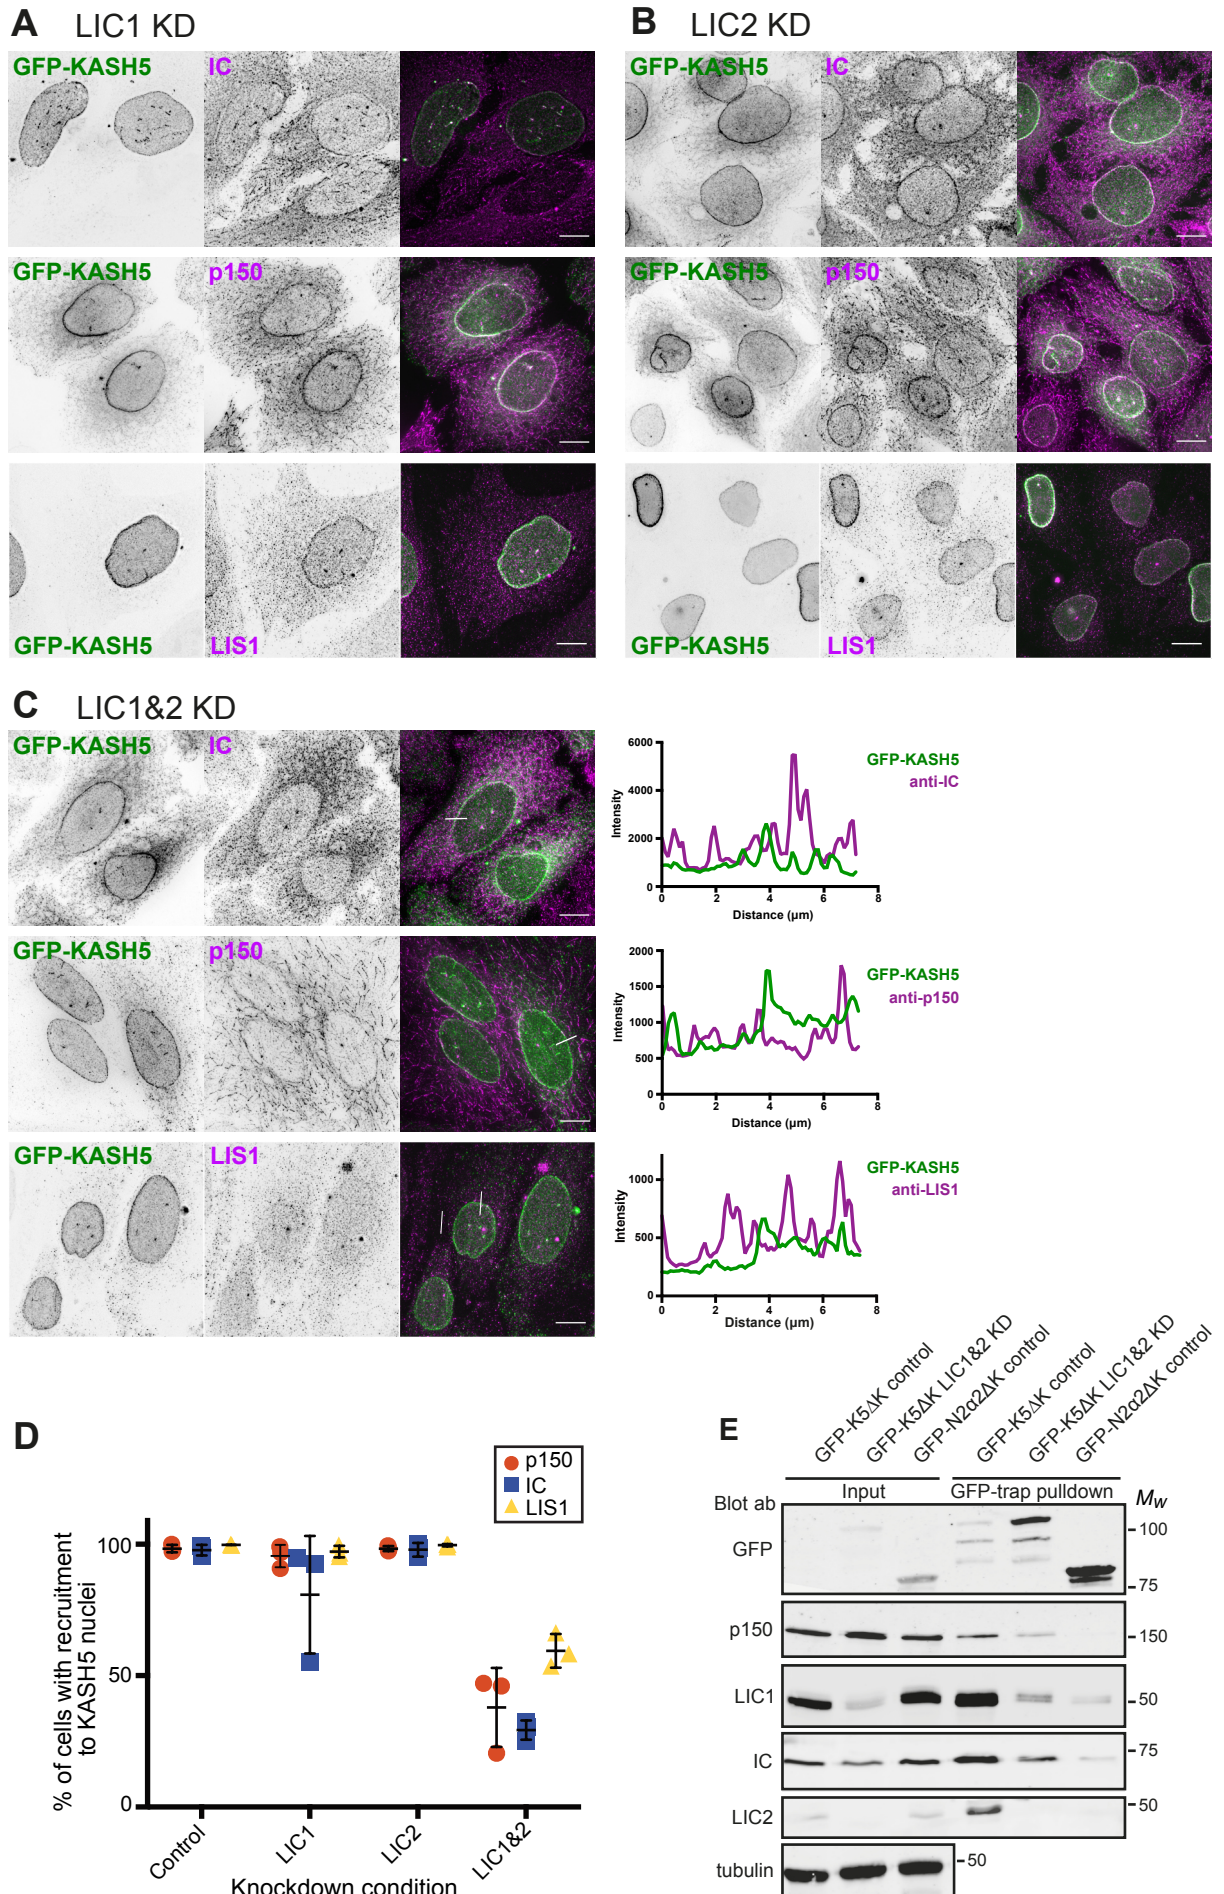



Figure 4, Garner et al.

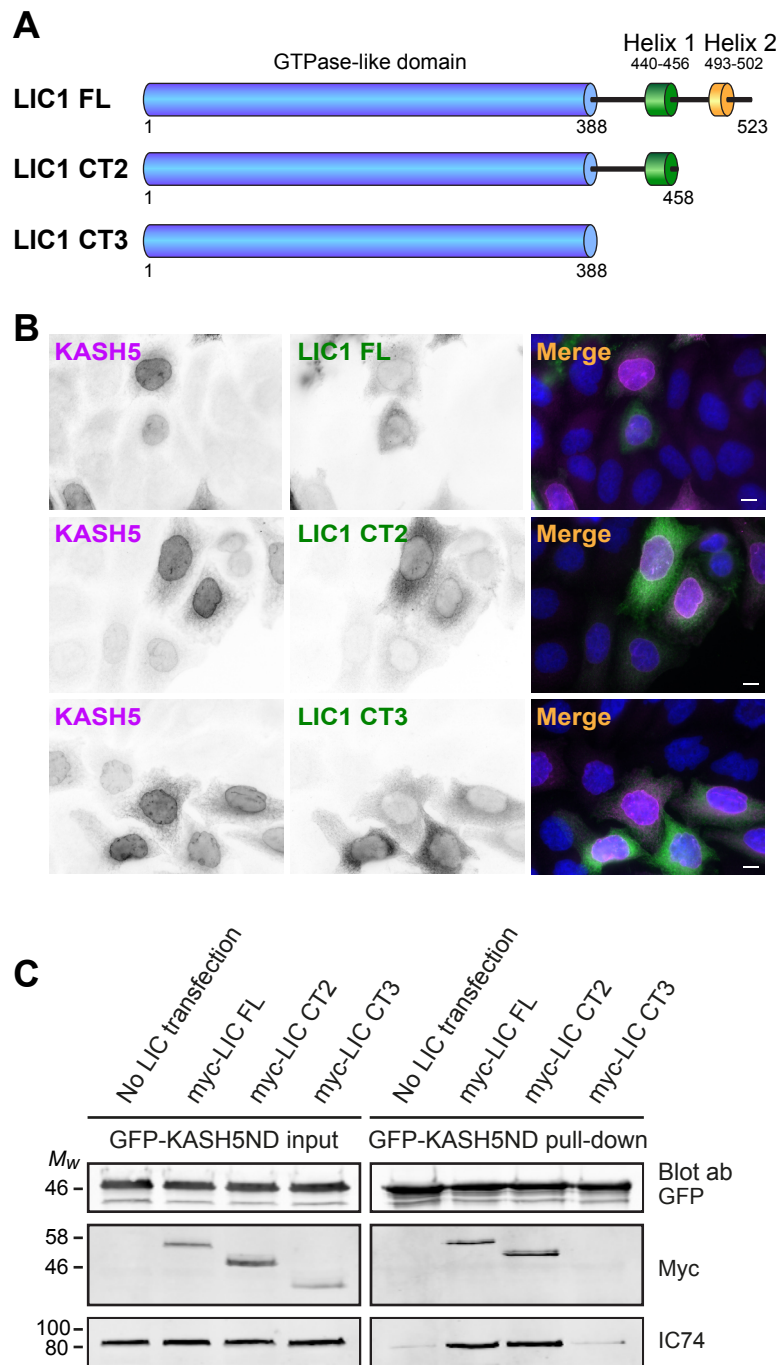

**Figure 5, Garner et al.**

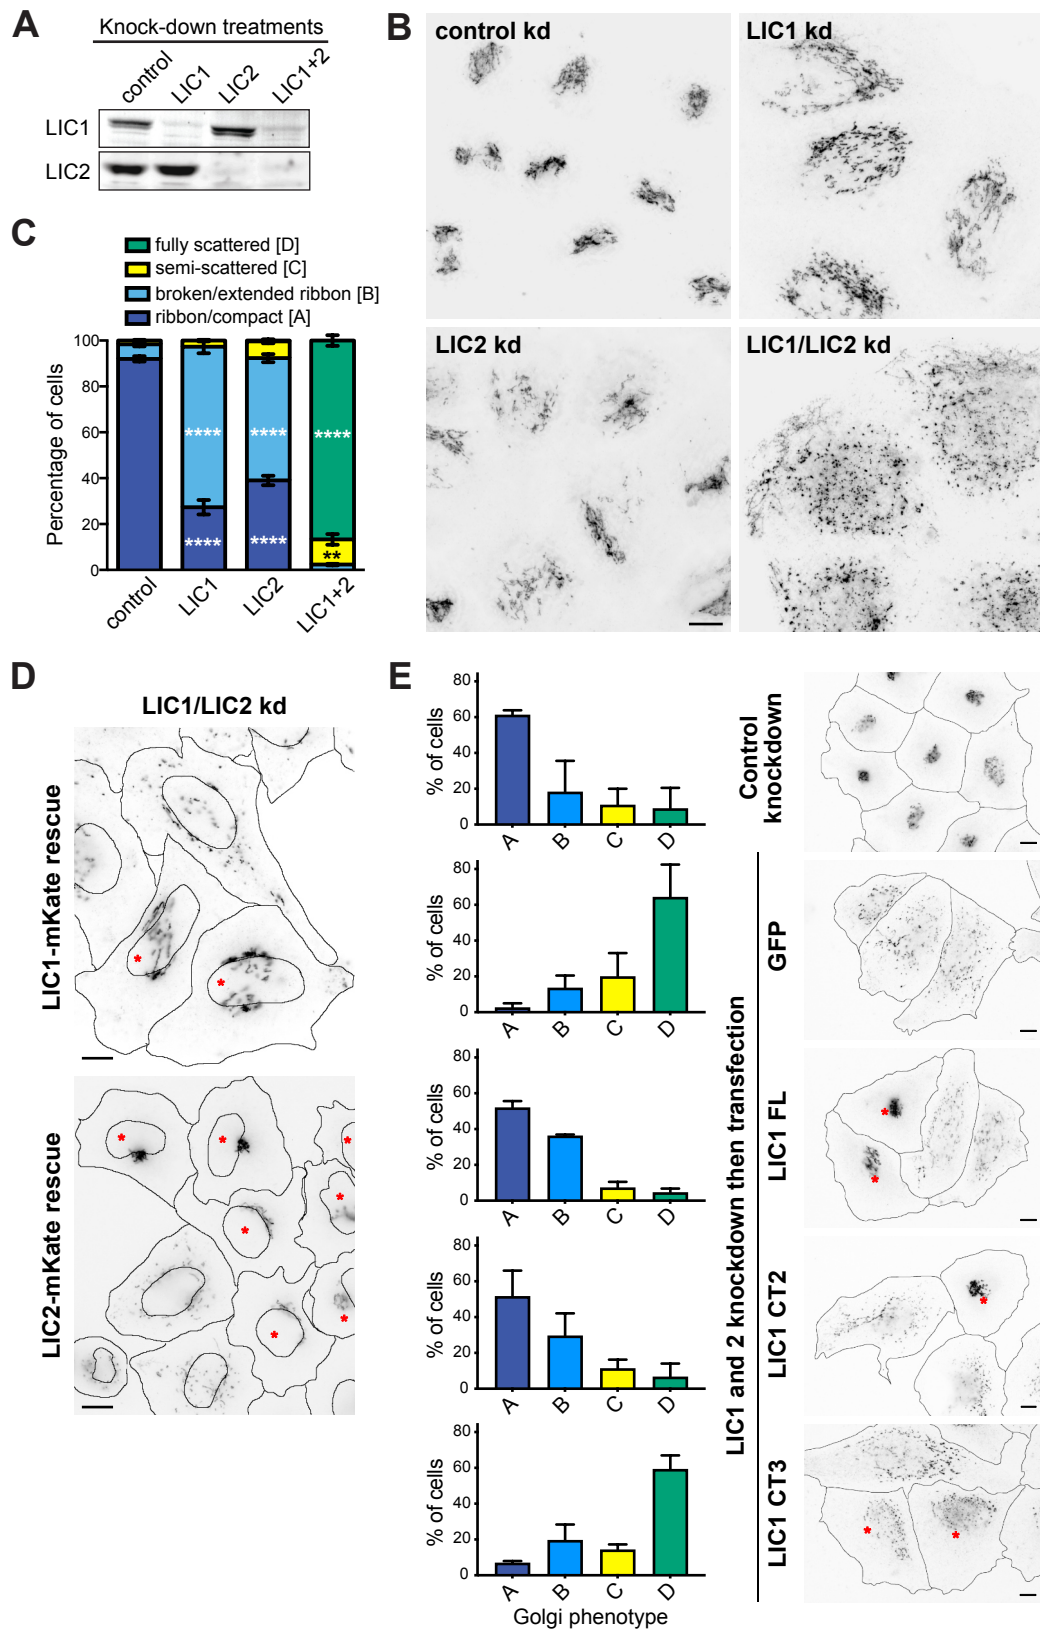

## Figure 6, Garner et al.

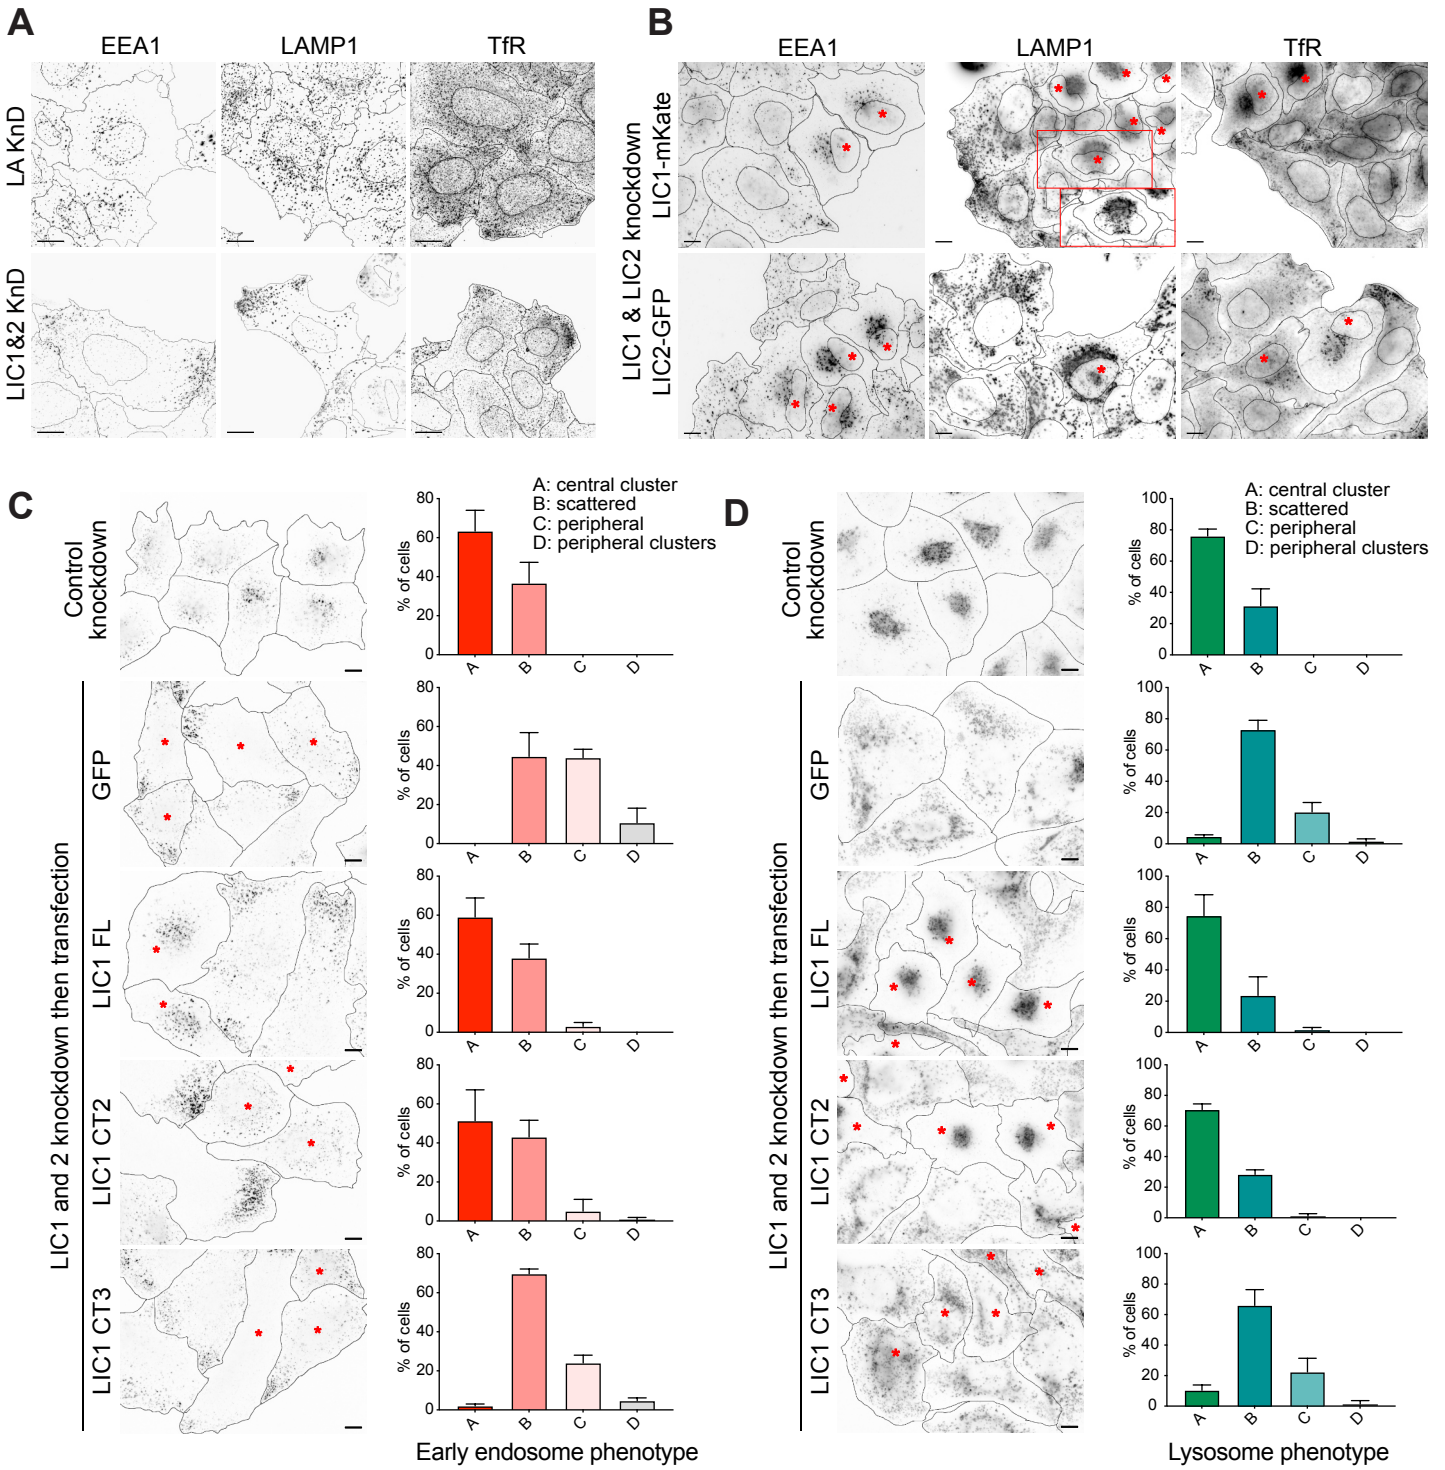

## Figure 7, Garner et al.

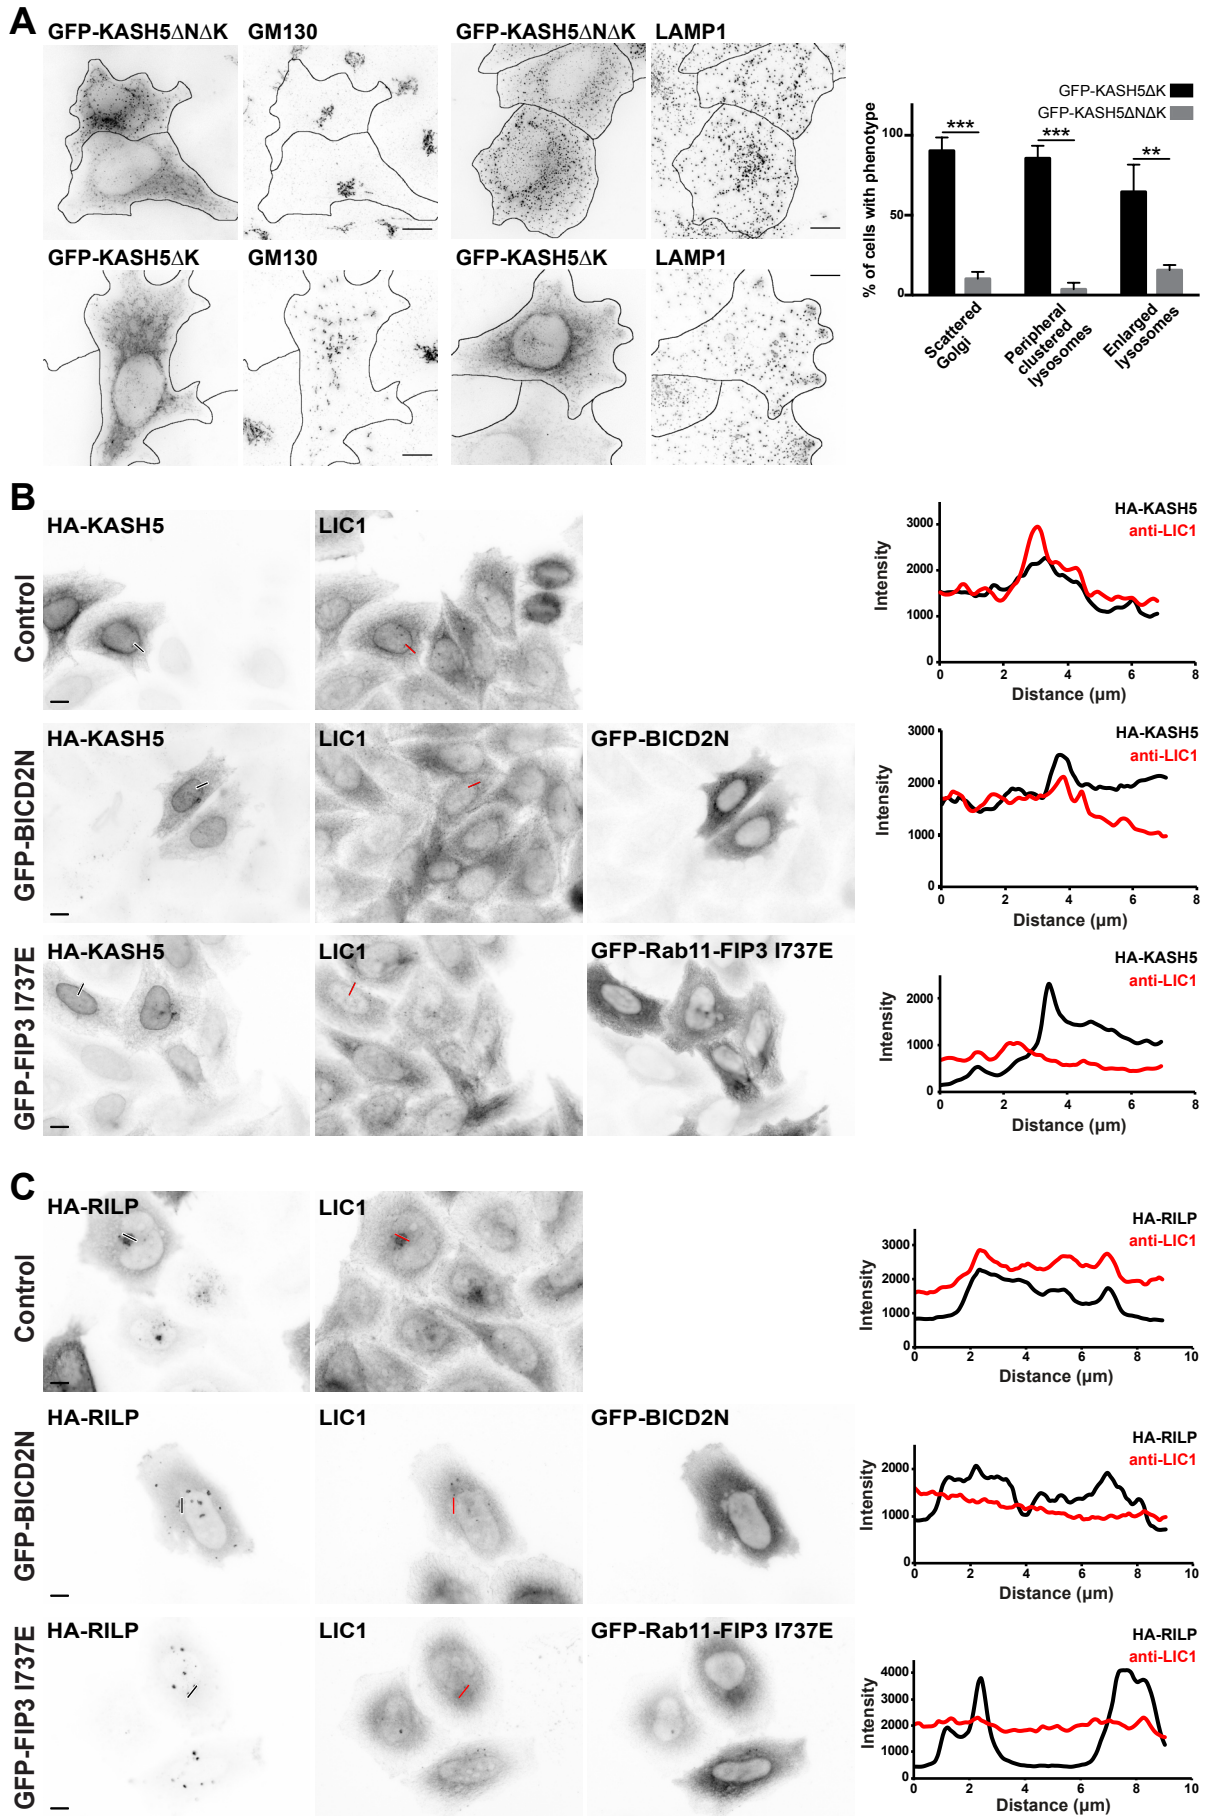

## Garner et al. Figure 8

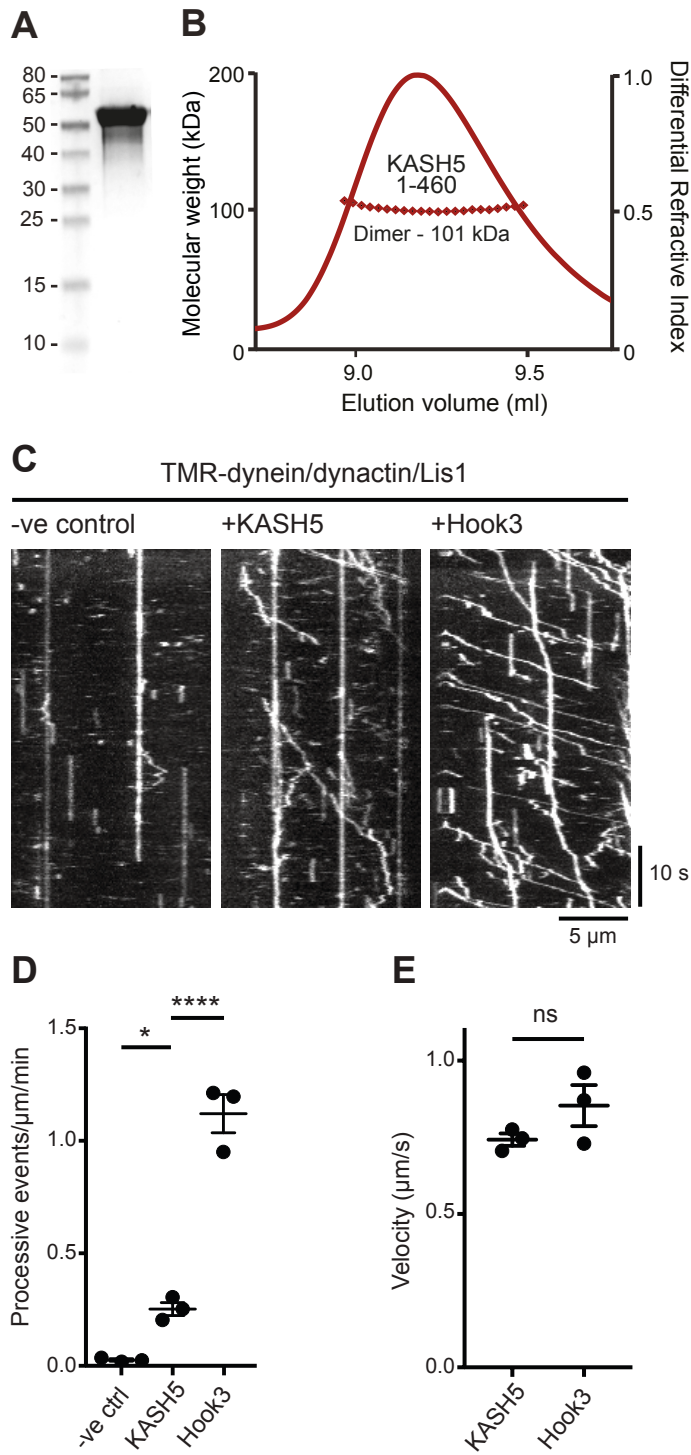

## Figure 9, Garner et al.

### A EF hand alignments

|                              | Incoming helix                                                                                                                                    | EF hand 1       | Exiting helix | Incoming helix | EF hand 2       | Exiting helix |
|------------------------------|---------------------------------------------------------------------------------------------------------------------------------------------------|-----------------|---------------|----------------|-----------------|---------------|
| CRACR2a (54-119)             | ---K A Q E F F Q T C D A E G K G F I A R K D M Q R L H K E L P L S L E E L E D V F D A --- L D A D G N G Y L T P O E F T T G F S H F F F S        |                 |               |                |                 |               |
| Rab45 (8-77)                 | E E L A R L R S V F A A C D A R S G R L E R E E F R A L C T E L R V R P A D A E A V F Q R --- L D A D R D G A I T F O E F A R G F L F S L R G     |                 |               |                |                 |               |
| FIP3 (202-269)               | E D G P R L R A V F D A L D G D G G F V R I E D F I Q F A T V Y G A --- E Q V K D L T K Y --- L D P S G L G V I S F E D F Y Q G I T A I R N G     |                 |               |                |                 |               |
| NIN (8-77)                   | Q H E A R L K L F D F D T T G T G S L G Q E E F I T D L C H M L S L --- E V A V P L Q Q T L --- L Q D N L L G R V H P D Q F K E A L I L L S R     |                 |               |                |                 |               |
| hKASH5 (31-104)              | L E E Q I L N S T F E A C D P Q R T G T V A V A Q V L A Y L E A V T G Q G P Q D A R L Q T L A N S L D P N G E G P K A T V D L D T F L V V M R D W |                 |               |                |                 |               |
| EFHand Consensus amino acids |                                                                                                                                                   | D D G D G I D E |               |                | D D G D G I D E |               |
| Position name                |                                                                                                                                                   | X Y Z -Y -X -Z  |               |                | X Y Z -Y -X -Z  |               |
| Mouse KASH5                  | L E E Q I L N S T F E A C D P H K T G T V V A H L A Y L E A V T G Q G P Q D V R L O T L A R S L D P Y G E G A G A V E L D T F L V V M R D W       |                 |               |                |                 |               |
| Rat KASH5                    | L E E Q I L N S T F E A C D P H K T G T V V A H L A Y L E A V T G Q G P Q D V R L O T L A R S L D P Y G E G A G A V E L D T F L V V M R D W       |                 |               |                |                 |               |
| Dog KASH5                    | L E E Q I L N S T F E A C D P H K T G T V V A H L A Y L E A V T G Q G P Q D V R L O T L A C N L D P N G E G P Q A V E L D T F L V V M R D W       |                 |               |                |                 |               |
| Human KASH5                  | L E E Q I L N S T F E A C D P H K T G T V A V A Q V L A Y L E A V T G Q G P Q D A R L Q T L A N S L D P N G E G P K A T V D L D T F L V V M R D W |                 |               |                |                 |               |
| Cow KASH5                    | L E E Q I L N S T F E A C D P H K T G T V A V T H L A Y L E A V T G Q G P Q D A R L O T L A C S L D P S G E G P Q A V E L D T F L V V M R D W     |                 |               |                |                 |               |

### EF hand mutations

|                    | Incoming helix                                                                                                                                    | EF hand 1 | Exiting helix | Incoming helix | EF hand 2 | Exiting helix | Dynein binding? |
|--------------------|---------------------------------------------------------------------------------------------------------------------------------------------------|-----------|---------------|----------------|-----------|---------------|-----------------|
| hKASH5wt (31-104)  | L E E Q I L N S T F E A C D P Q R T G T V A V A Q V L A Y L E A V T G Q G P Q D A R L Q T L A N S L D P N G E G P K A T V D L D T F L V V M R D W |           |               |                |           |               | +               |
| hKASH5- <i>fue</i> | L E E Q I L N S T F E A C D P Q R T G T V A E A Q V L A Y L E A V T G Q G P Q D A R L Q T L A N S L D P N G E G P K A T V D L D T F L V V M R D W |           |               |                |           |               | -               |
| hKASH5-EF-AA       | L E E Q I L N S T F E A C A P A R T G T V A V A Q V L A Y L E A V T G Q G P Q D A R L Q T L A N S L A P A G E G P K A T V D L D T F L V V M R D W |           |               |                |           |               | -               |
| hKASH5-EF-mod1     | L E E Q I L N S T F E A C D P E R T G T V A V A D V L A Y L E A V T G Q G P Q D A R L Q T L A N S L D P N G E G Y L A T V D L D T F L V V M R D W |           |               |                |           |               | +               |
| hKASH5-EF-mod2     | L E E Q I L N S T F E A C D A E G K G F T A R K D V L A Y L E A V T G Q G P Q D A R L Q T L A N S L D A D G N G Y L T P Q E L D T F L V V M R D W |           |               |                |           |               | +               |
| CRACR2a            | ---K A Q E F F Q T C D A E G K G F I A R K D M Q R L H K E L P L S L E E L E D V F D A --- L D A D G N G Y L T P O E F T T G F S H F F F S        |           |               |                |           |               |                 |
| CRACR2a F58D       | ---K A Q E F F Q T C D A E G K G D T A R K D M Q R L H K E L P L S L E E L E D V F D A --- L D A D G N G Y L T P O E F T T G F S H F F F S        |           |               |                |           |               |                 |
| CRACR2a (EFmut)    | ---K A Q E F F Q T C A A A G K G F I A R K D M Q R L H K E L P L S L E E L E D V F D A --- L A A A G N G Y L T P O E F T T G F S H F F F S        |           |               |                |           |               |                 |

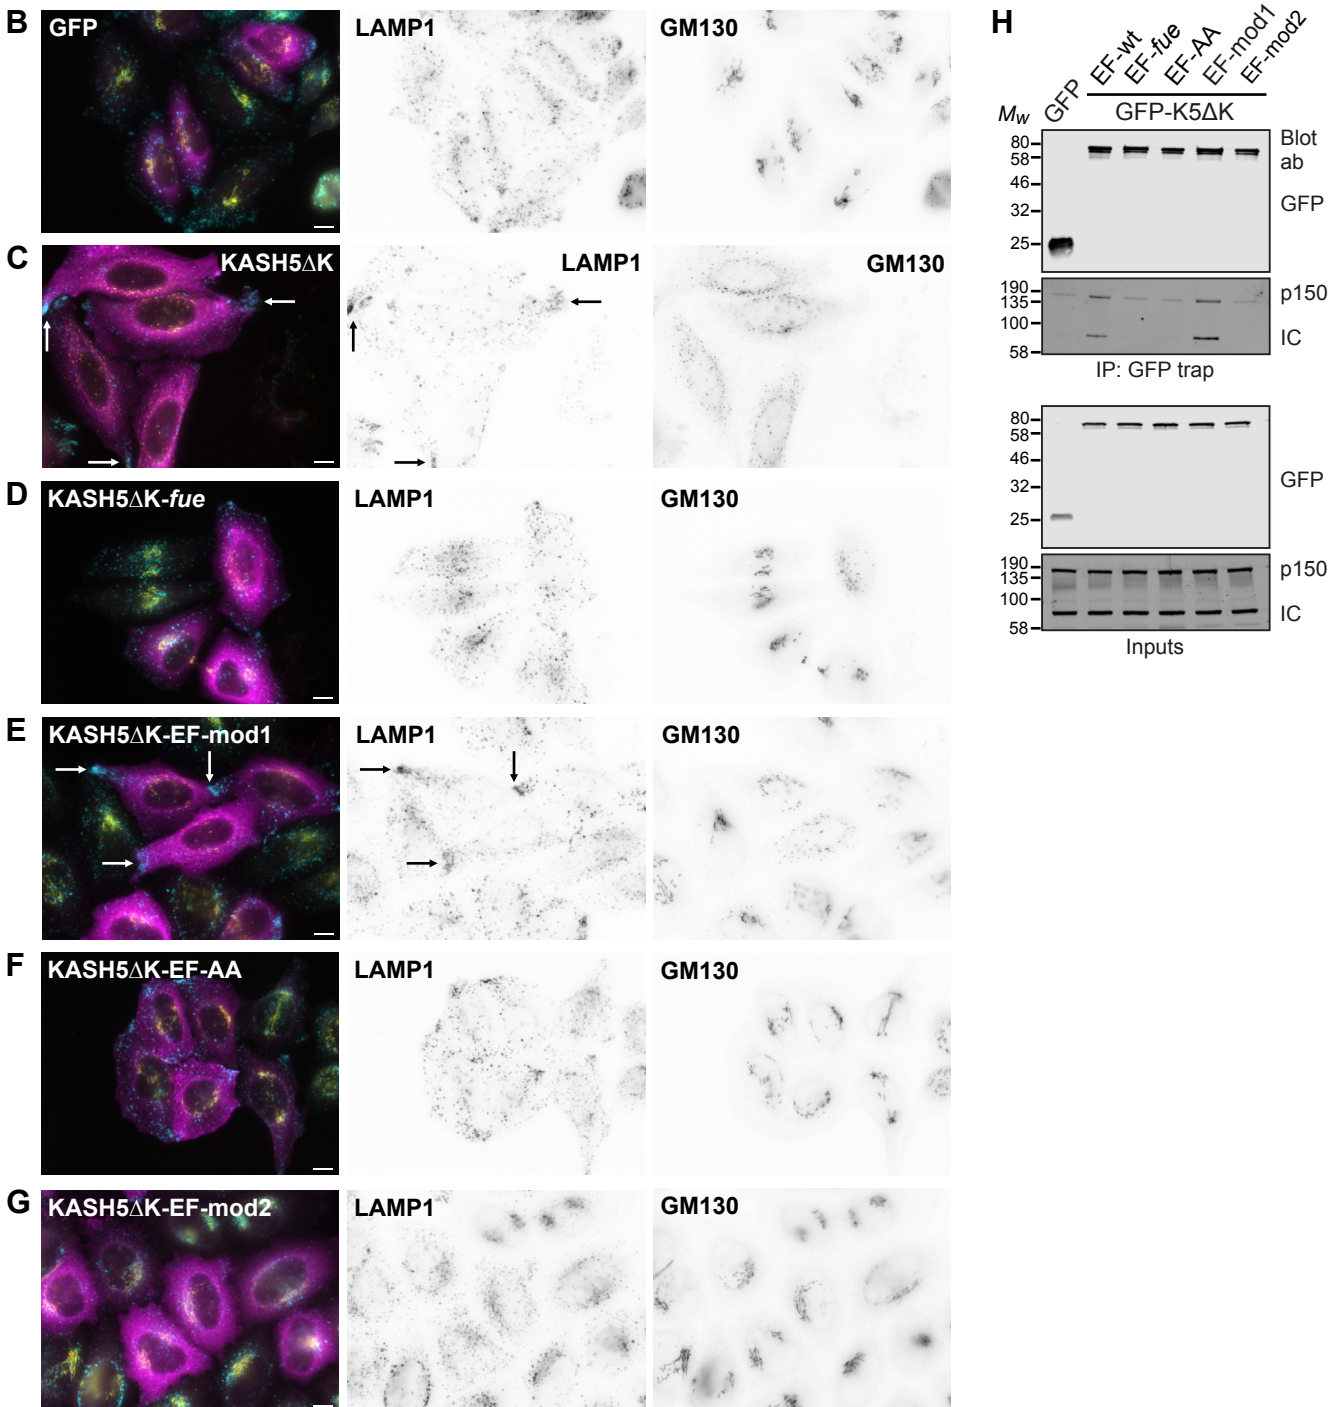

## Garner et al., Supplementary Figure 1

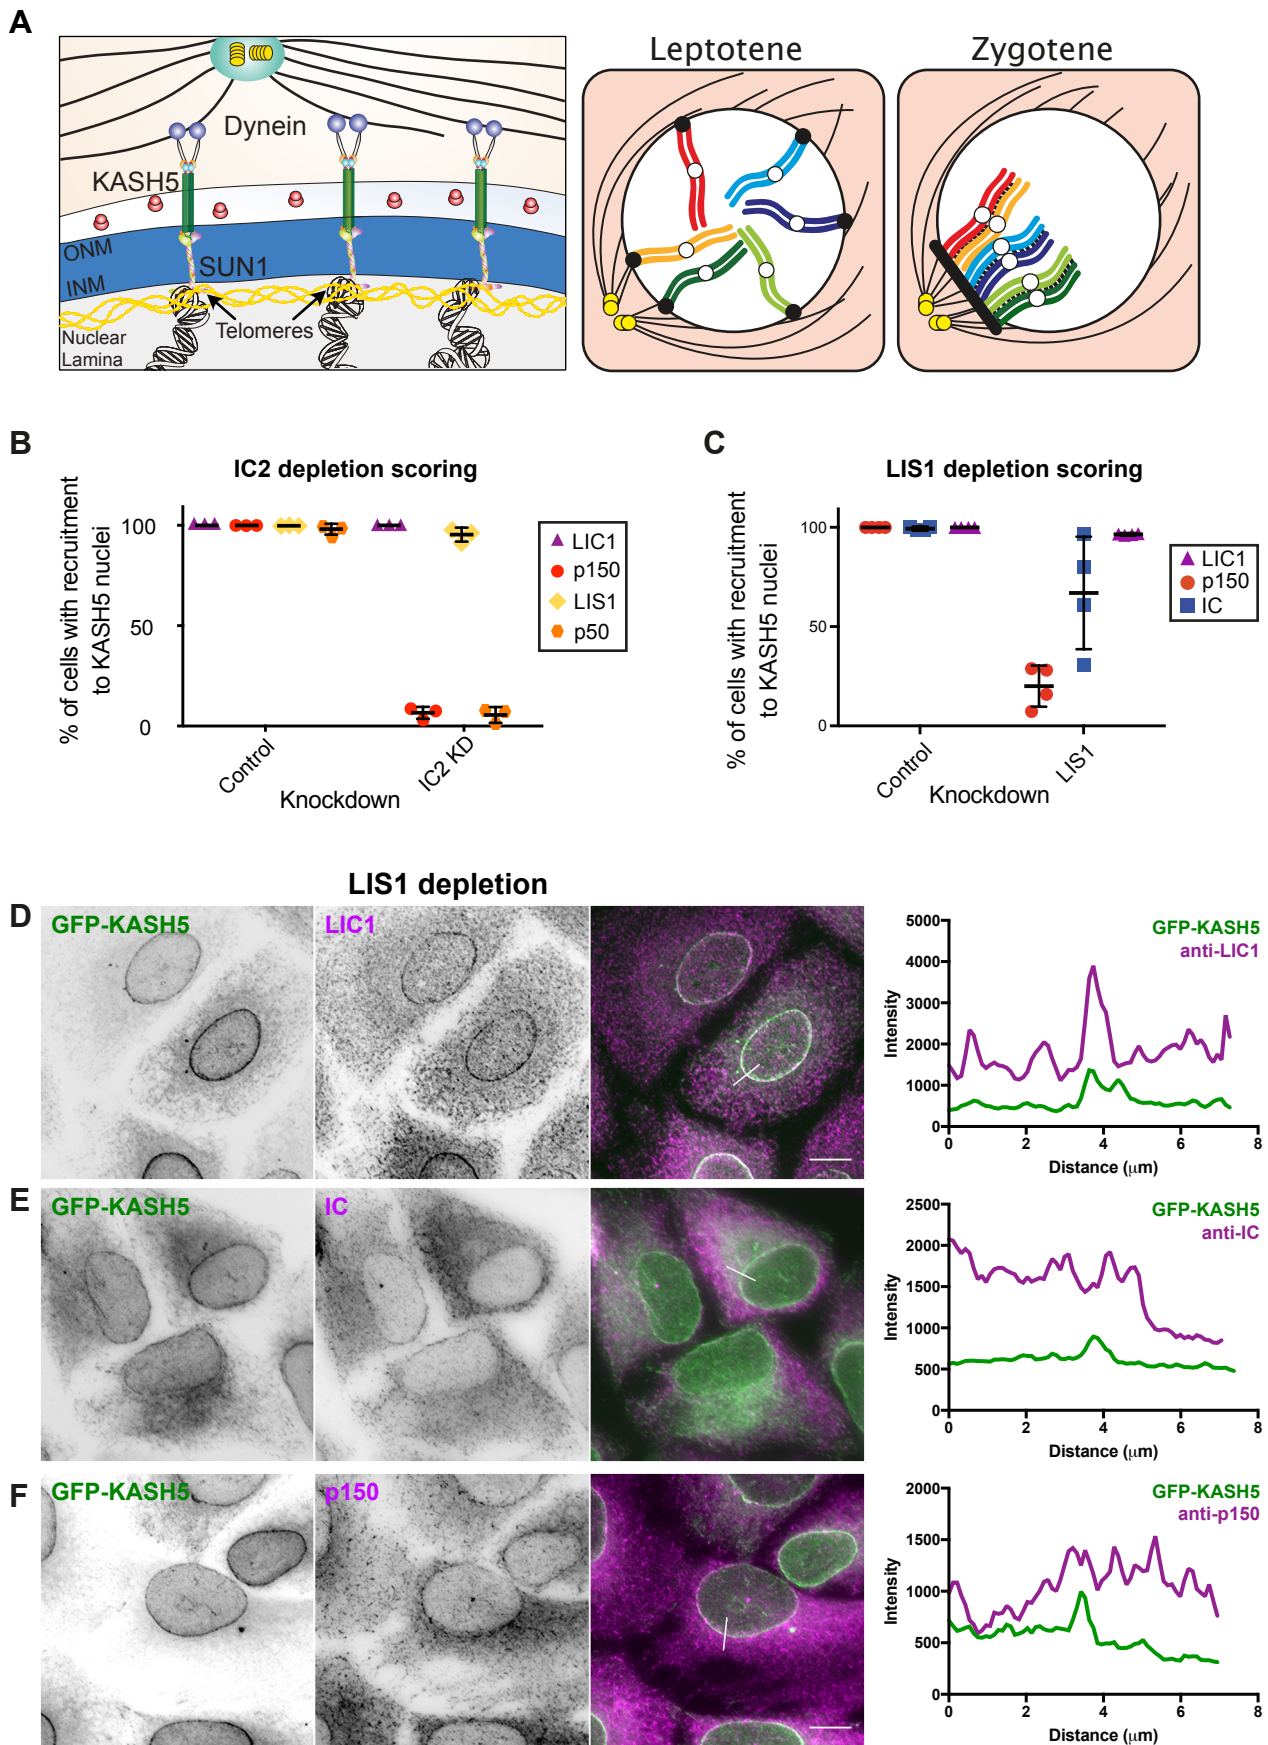

## Garner et al. Supplementary Figure 2

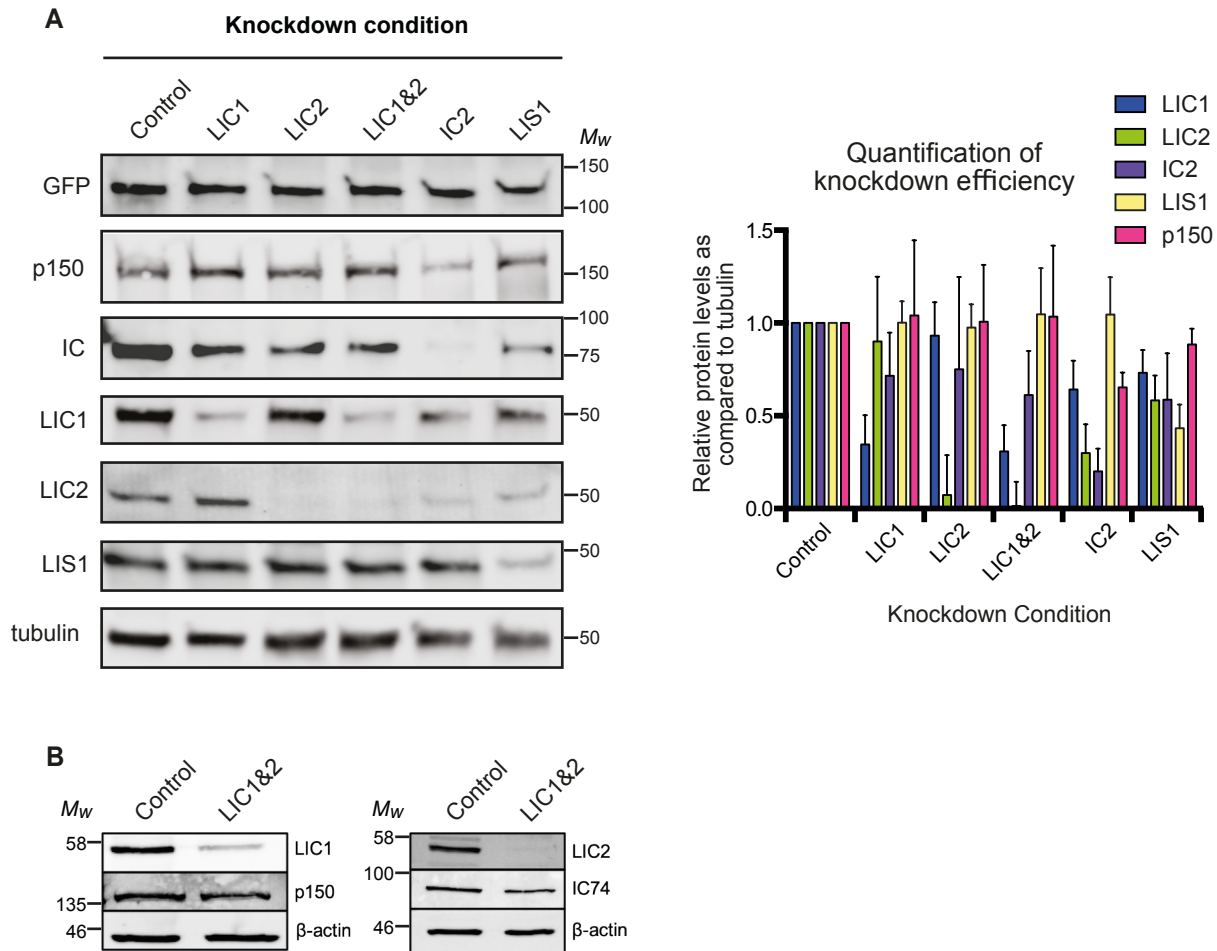



## Garner et al. Supplementary Figure 3

### Golgi apparatus phenotype scoring

B

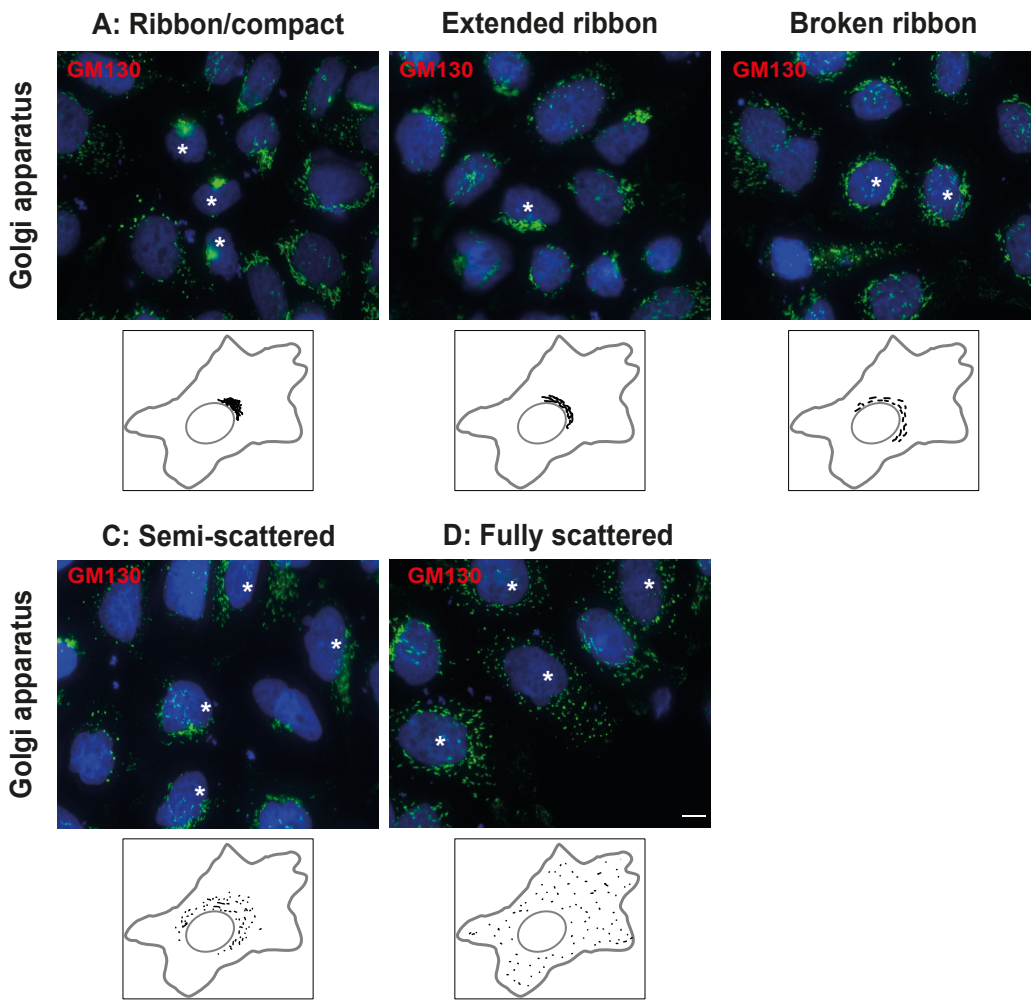

### Early endosome and lysosome phenotype scoring

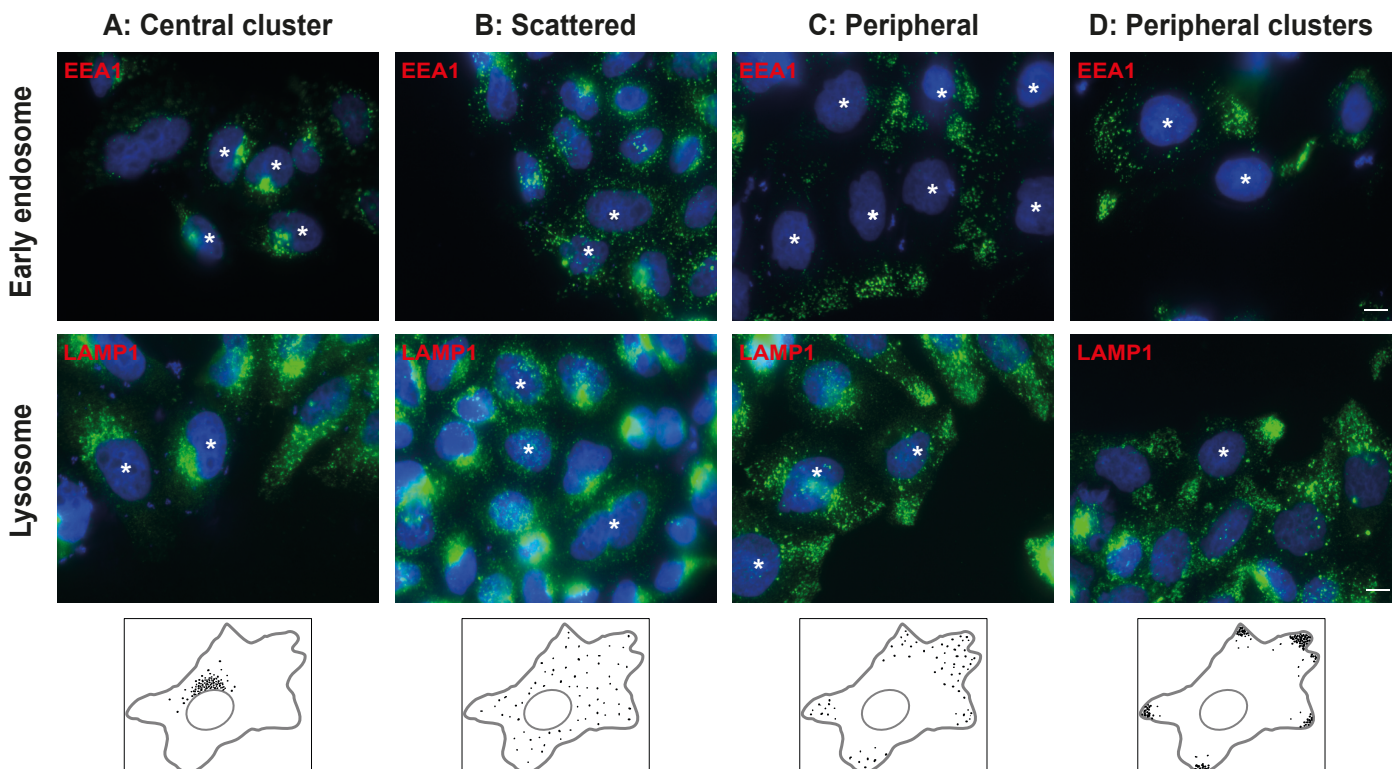

## Garner et al. Supplementary Figure 4

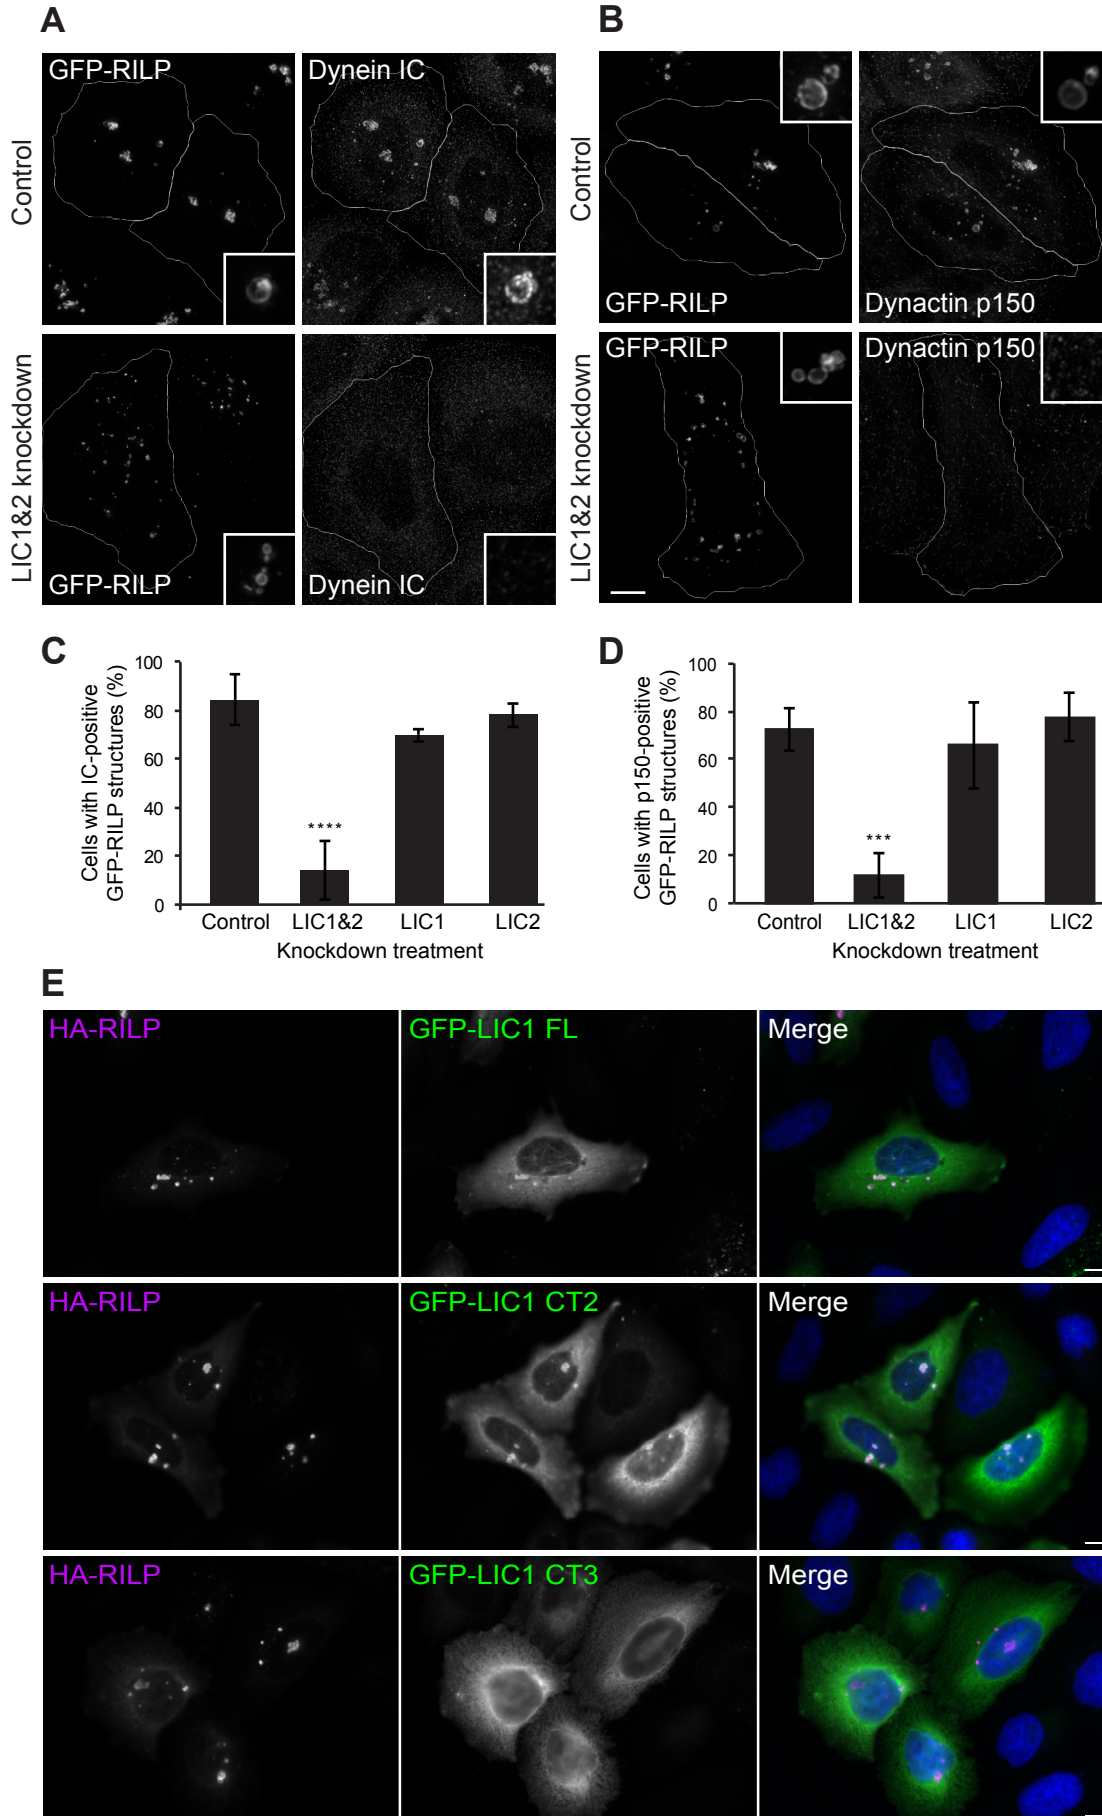

## Garner et al. Supplementary Figure 5

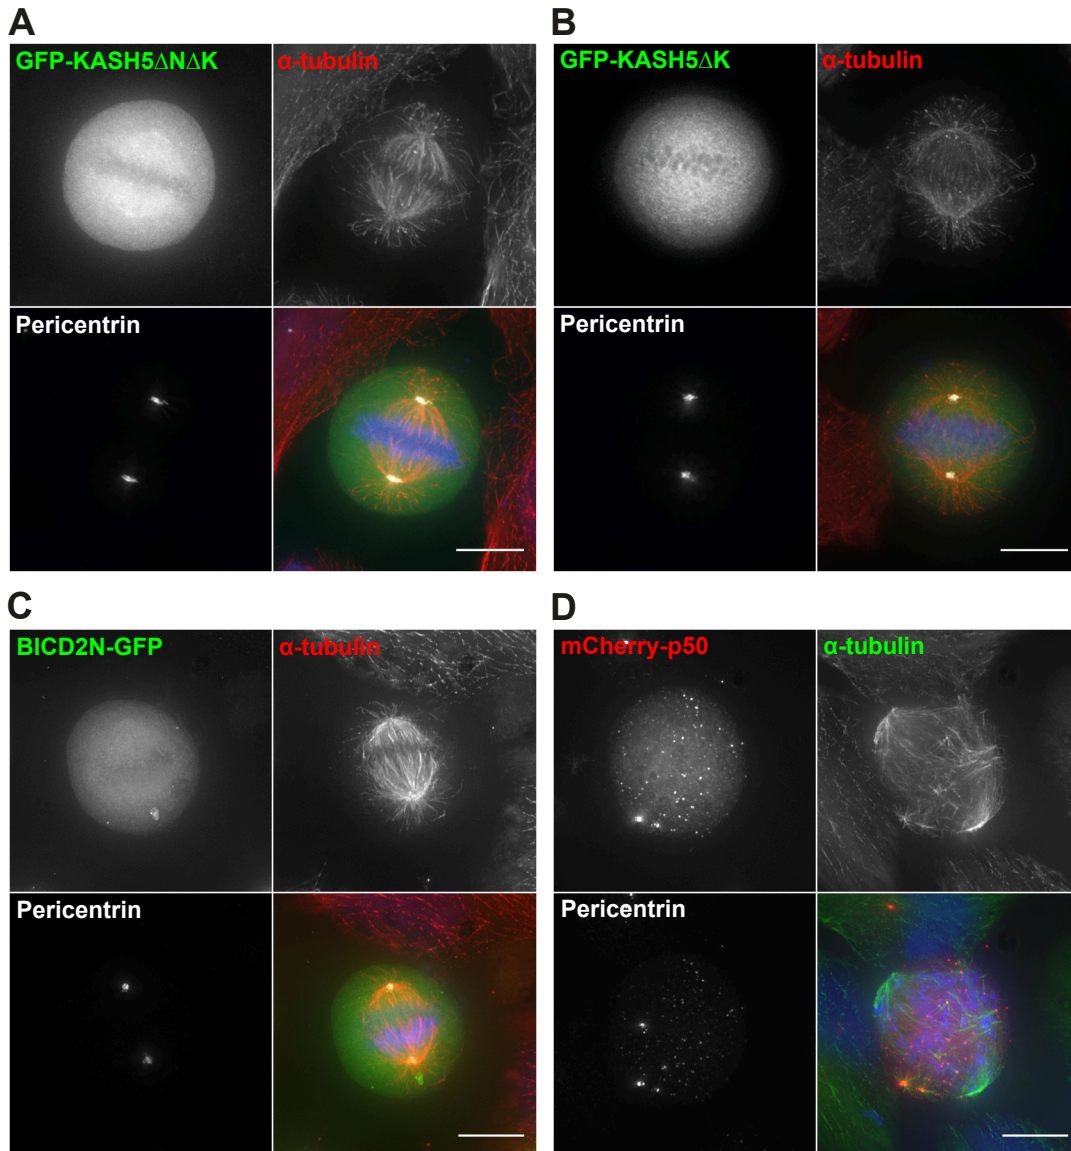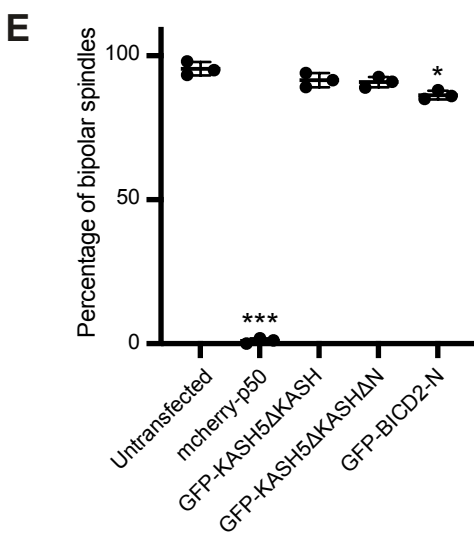

## Garner et al. Supplementary Figure 6

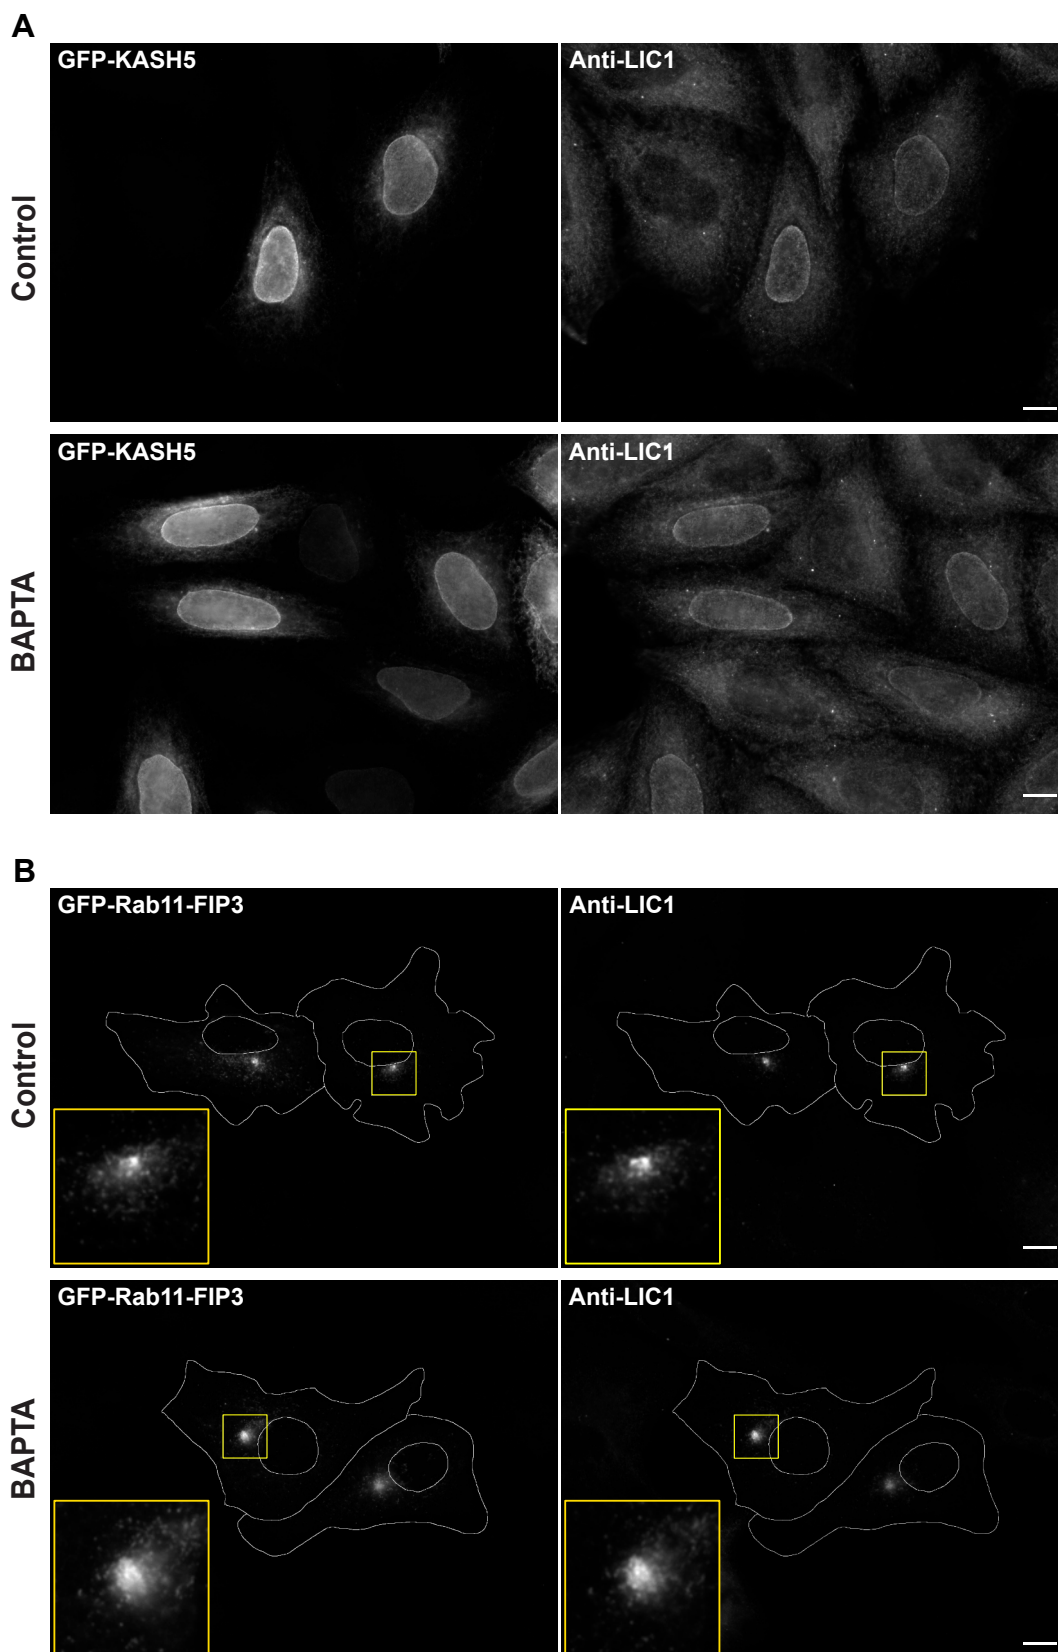

**Table S1. Statistical analysis of the effects of LIC1 and LIC2 depletion on Golgi apparatus morphology.**

The data presented graphically in Figure 5C were analysed by Two-way ANOVA with Tukey's test. P values are shown. Analysis of 100 cells per condition, in each of 3 independent experiments.

| Ribbon/compact     |          | Broken/extended ribbon |          | Semi-scattered     |        | Full scattered     |          |
|--------------------|----------|------------------------|----------|--------------------|--------|--------------------|----------|
| control vs. LIC1   | ≤ 0.0001 | control vs. LIC1       | ≤ 0.0001 | control vs. LIC1   | 0.9697 | control vs. LIC1   | >0.9999  |
| control vs. LIC2   | ≤ 0.0001 | control vs. LIC2       | ≤ 0.0001 | control vs. LIC2   | 0.0735 | control vs. LIC2   | 0.9988   |
| control vs. LIC1+2 | ≤ 0.0001 | control vs. LIC1+2     | 0.2971   | control vs. LIC1+2 | 0.0012 | control vs. LIC1+2 | ≤ 0.0001 |
| LIC1 vs. LIC2      | ≤ 0.0001 | LIC1 vs. LIC2          | ≤ 0.0001 | LIC1 vs. LIC2      | 0.1790 | LIC1 vs. LIC2      | 0.9988   |
| LIC1 vs. LIC1+2    | ≤ 0.0001 | LIC1 vs. LIC1+2        | ≤ 0.0001 | LIC1 vs. LIC1+2    | 0.0040 | LIC1 vs. LIC1+2    | ≤ 0.0001 |
| LIC2 vs. LIC1+2    | ≤ 0.0001 | LIC2 vs. LIC1+2        | ≤ 0.0001 | LIC2 vs. LIC1+2    | 0.3715 | LIC2 vs. LIC1+2    | ≤ 0.0001 |
